# Supplementary material
Source: publisher site journal article supplement (https://www.dovepress.com/article/568205)
Supplement: Supplementary file 1 [file 568205%20Revised%20Supplementary%20Materials.docx]

# Supplementary Material

Effect of exercise based on American College of Sports Medicine recommendations on glycemic management in patients with Type 1 diabetes: a systematic review and meta-analysis of randomized controlled trials

**Supplementary Table S1** Search strategies

| Database | # | Search terms |
| --- | --- | --- |
| PubMed | 1 | ((((((((((((((((((((((((((Diabetes Mellitus, Type 1[MeSH Terms]) OR (Diabetes Mellitus, Insulin-Dependent[Title/Abstract])) OR (Diabetes Mellitus, Insulin Dependent[Title/Abstract])) OR (Insulin-Dependent Diabetes Mellitus[Title/Abstract])) OR (Diabetes Mellitus, Juvenile-Onset[Title/Abstract])) OR (Diabetes Mellitus, Juvenile Onset[Title/Abstract])) OR (Juvenile-Onset Diabetes Mellitus[Title/Abstract])) OR (IDDM[Title/Abstract])) OR (Juvenile-Onset Diabetes[Title/Abstract])) OR (Diabetes, Juvenile-Onset[Title/Abstract])) OR (Juvenile Onset Diabetes[Title/Abstract])) OR (Diabetes Mellitus, Sudden-Onset[Title/Abstract])) OR (Diabetes Mellitus, Sudden Onset[Title/Abstract])) OR (Sudden-Onset Diabetes Mellitus[Title/Abstract])) OR (Type 1 Diabetes Mellitus[Title/Abstract])) OR (Diabetes Mellitus, Insulin-Dependent, 1[Title/Abstract])) OR (Insulin-Dependent Diabetes Mellitus 1[Title/Abstract])) OR (Insulin Dependent Diabetes Mellitus 1[Title/Abstract])) OR (Type 1 Diabetes[Title/Abstract])) OR (Diabetes, Type 1[Title/Abstract])) OR (Diabetes Mellitus, Type 1[Title/Abstract])) OR (Diabetes, Autoimmune[Title/Abstract])) OR (Autoimmune Diabetes[Title/Abstract])) OR (Diabetes Mellitus, Brittle[Title/Abstract])) OR (Brittle Diabetes Mellitus[Title/Abstract])) OR (Diabetes Mellitus, Ketosis-Prone[Title/Abstract])) OR (Diabetes Mellitus, Ketosis Prone[Title/Abstract]) OR (Ketosis-Prone Diabetes Mellitus[Title/Abstract]) |
|  | 2 | (((((((((((((((((((Exercise*[Title/Abstract]) OR (Physical Activit*[Title/Abstract])) OR (Activit*, Physical[Title/Abstract])) OR (Exercise*, Physical[Title/Abstract]) ) OR (Physical Exercise*[Title/Abstract])) OR (Acute Exercise*[Title/Abstract])) OR (Exercise*, Acute[Title/Abstract])) OR (Exercise*, Isometric[Title/Abstract])) OR (Isometric Exercise*[Title/Abstract])) OR (Exercise*, Aerobic[Title/Abstract])) OR (Aerobic Exercise*[Title/Abstract]))) OR (Exercise Training*[Title/Abstract])) OR (Training*, Exercise[Title/Abstract]) OR (Tai Chi[Title/Abstract])) OR (Yoga[Title/Abstract])) OR (Wuqinxi[Title/Abstract])) OR (Baduanjin[Title/Abstract])) OR (Yijinjing[Title/Abstract])) OR (Kickboxing[Title/Abstract])) OR (Pilates[Title/Abstract]) |
|  | 3 | (((Blood Glucose[MeSH Terms]) OR (Blood Sugar[Title/Abstract])) OR (Sugar, Blood[Title/Abstract])) OR (Glucose, Blood[Title/Abstract]) OR (HbA1c[Title/Abstract]) OR (glycated hemoglobin[Title/Abstract]) |
|  | 4 | ((((Randomized controlled trial[Publication Type]) OR (controlled clinical trial[Publication Type])) OR (Clinical Trials, Randomized) OR (Trials, Randomized Clinical) OR (Controlled Clinical Trials, Randomized) OR (randomized[Title/Abstract])) OR (placebo[Title/Abstract])) OR (randomly[Title/Abstract]) |
|  | 5 | #1 AND #2 AND #3 AND #4 |
| Cochrane | 1 | (Diabetes Mellitus, Type 1):ti,ab,kw OR (Diabetes Mellitus, Insulin-Dependent):ti,ab,kw OR (Diabetes Mellitus, Insulin Dependent):ti,ab,kw OR (Insulin-Dependent Diabetes Mellitus):ti,ab,kw OR (Diabetes Mellitus, Juvenile-Onset):ti,ab,kw |
|  | 2 | (Diabetes Mellitus, Juvenile Onset):ti,ab,kw OR (Juvenile-Onset Diabetes Mellitus):ti,ab,kw OR (IDDM):ti,ab,kw OR (Juvenile-Onset Diabetes):ti,ab,kw OR (Diabetes, Juvenile-Onset):ti,ab,kw |
|  | 3 | (Juvenile Onset Diabetes):ti,ab,kw OR (Diabetes Mellitus, Sudden-Onset):ti,ab,kw OR (Diabetes Mellitus, Sudden Onset):ti,ab,kw OR (Sudden-Onset Diabetes Mellitus):ti,ab,kw OR (Type 1 Diabetes Mellitus):ti,ab,kw |
|  | 4 | (Diabetes Mellitus, Insulin-Dependent, 1):ti,ab,kw OR (Insulin-Dependent Diabetes Mellitus 1):ti,ab,kw OR (Insulin Dependent Diabetes Mellitus 1):ti,ab,kw OR (Type 1 Diabetes):ti,ab,kw OR (Diabetes, Type 1):ti,ab,kw |
|  | 5 | (Diabetes, Autoimmune):ti,ab,kw OR (Autoimmune Diabetes):ti,ab,kw OR (Diabetes Mellitus, Brittle):ti,ab,kw OR (Brittle Diabetes Mellitus):ti,ab,kw |
|  | 6 | (Diabetes Mellitus, Ketosis-Prone):ti,ab,kw OR (Diabetes Mellitus, Ketosis Prone):ti,ab,kw OR (Ketosis-Prone Diabetes Mellitus):ti,ab,kw |
|  | 7 | #1 OR #2 OR #3 OR #4 OR #5 OR #6 |
|  | 8 | (Acute Exercise*):ti,ab,kw OR (Exercise*, Acute):ti,ab,kw OR (Exercise*, Isometric):ti,ab,kw OR (Isometric Exercise*):ti,ab,kw OR (Exercise*, Aerobic):ti,ab,kw |
|  | 9 | (Exercise*):ti,ab,kw OR (Physical Activit*):ti,ab,kw OR (Activit*, Physical):ti,ab,kw OR (Exercise*, Physical):ti,ab,kw OR (Physical Exercise*):ti,ab,kw |
|  | 10 | (Aerobic Exercise*):ti,ab,kw OR (Exercise Training*):ti,ab,kw OR (Training*, Exercise):ti,ab,kw OR (Tai Ch):ti,ab,kw OR (Yoga):ti,ab,kw |
|  | 11 | (Wuqinxi):ti,ab,kw OR (Baduanjin):ti,ab,kw OR (Yijinjing):ti,ab,kw OR (Kickboxing):ti,ab,kw OR (Pilates):ti,ab,kw |
|  | 12 | #8 OR #9 OR #10 OR #11 |
|  | 13 | (Blood Glucose):ti,ab,kw OR (Blood Sugar):ti,ab,kw OR (Sugar, Blood):ti,ab,kw OR (Glucose, Blood):ti,ab,kw (HbA1c[Title/Abstract]) OR (glycated hemoglobin[Title/Abstract]) |
|  | 14 | (Randomized controlled trial):ti,ab,kw OR (controlled clinical trial):ti,ab,kw OR (Clinical Trials, Randomized):ti,ab,kw OR (Trials, Randomized Clinical):ti,ab,kw OR (Controlled Clinical Trials, Randomized):ti,ab,kw |
|  | 15 | #7 AND #12 AND #13 AND #14 |
| Embace | 1 | 'diabetes mellitus, insulin-dependent':ti,ab,kw OR 'diabetes mellitus, insulin dependent':ti,ab,kw OR 'insulin-dependent diabetes mellitus':ti,ab,kw OR 'diabetes mellitus, juvenile-onset':ti,ab,kw OR 'diabetes mellitus, juvenile onset':ti,ab,kw OR 'juvenile-onset diabetes mellitus':ti,ab,kw OR iddm:ti,ab,kw OR 'juvenile-onset diabetes':ti,ab,kw OR 'diabetes, juvenile-onset':ti,ab,kw OR 'juvenile onset diabetes':ti,ab,kw OR 'diabetes mellitus, sudden-onset':ti,ab,kw OR 'diabetes mellitus, sudden onset':ti,ab,kw OR 'sudden-onset diabetes mellitus':ti,ab,kw OR 'type 1 diabetes mellitus':ti,ab,kw OR 'diabetes mellitus, insulin-dependent, 1':ti,ab,kw OR 'insulin-dependent diabetes mellitus 1':ti,ab,kw OR 'insulin dependent diabetes mellitus 1':ti,ab,kw OR 'type 1 diabetes':ti,ab,kw OR 'diabetes, type 1':ti,ab,kw OR 'diabetes mellitus, type 1':ti,ab,kw OR 'diabetes, autoimmune':ti,ab,kw OR 'autoimmune diabetes':ti,ab,kw OR 'diabetes mellitus, brittle':ti,ab,kw OR 'brittle diabetes mellitus':ti,ab,kw OR 'diabetes mellitus, ketosis-prone':ti,ab,kw OR 'diabetes mellitus, ketosis prone':ti,ab,kw OR 'ketosis-prone diabetes mellitus':ti,ab,kw |
|  | 2 | 'exercise*:ti,ab,kw OR 'physical activit*':ti,ab,kw OR 'activit*, physical':ti,ab,kw OR 'exercise*, physical':ti,ab,kw OR 'physical exercise*':ti,ab,kw OR 'acute exercise*':ti,ab,kw OR 'exercise*, acute':ti,ab,kw OR 'exercise*, isometric':ti,ab,kw OR 'isometric exercise*':ti,ab,kw OR 'exercise*, aerobic':ti,ab,kw OR 'aerobic exercise':ti,ab,kw OR 'exercise training*':ti,ab,kw OR 'training*, exercise':ti,ab,kw OR 'tai chi':ti,ab,kw OR yoga:ti,ab,kw OR wuqinxi:ti,ab,kw OR baduanjin:ti,ab,kw OR yijinjing:ti,ab,kw OR kickboxing:ti,ab,kw OR pilates:ti,ab,kw |
|  | 3 | 'blood glucose':ti,ab,kw OR 'blood sugar':ti,ab,kw OR 'sugar, blood':ti,ab,kw OR 'glucose, blood':ti,ab,kw OR 'HbA1c':ti,ab,kw OR 'glycated hemoglobin':ti,ab,kw |
|  | 4 | 'randomized controlled trial':ti,ab,kw OR 'controlled clinical trial':ti,ab,kw OR 'clinical trials, randomized':ti,ab,kw OR 'trials, randomized clinical':ti,ab,kw OR 'controlled clinical trials, randomized':ti,ab,kw OR 'randomized:ti,ab,kw' OR 'placebo:ti,ab,kw' OR 'randomly:ti,ab,kw' |
|  | 5 | #1 AND #2 AND #3 AND #4 |
| Web of Science | 1 | Diabetes Mellitus, Type 1 (All Fields) or Diabetes Mellitus, Insulin-Dependent (Topic) or Diabetes Mellitus, Insulin Dependent (Topic) or Insulin-Dependent Diabetes Mellitus (Topic) or Diabetes Mellitus, Juvenile-Onset (Topic) or Diabetes Mellitus, Juvenile Onset (Topic) or Juvenile-Onset Diabetes Mellitus (Topic) or IDDM (Topic) or Juvenile-Onset Diabetes (Topic) or Diabetes, Juvenile-Onset (Topic) or Juvenile Onset Diabetes (Topic) or Diabetes Mellitus, Sudden-Onset (Topic) or Diabetes Mellitus, Sudden Onset (Topic) or Sudden-Onset Diabetes Mellitus (Topic) or Type 1 Diabetes Mellitus (Topic) or Diabetes Mellitus, Insulin-Dependent, 1 (Topic) or Insulin-Dependent Diabetes Mellitus 1 (Topic) or Insulin Dependent Diabetes Mellitus 1 (Topic) or Type 1 Diabetes (Topic) or Diabetes, Type 1 (Topic) or Diabetes Mellitus, Type 1 (Topic) or Diabetes, Autoimmune (Topic) or Autoimmune Diabetes (Topic) or Diabetes Mellitus, Brittle (Topic) or Brittle Diabetes Mellitus (Topic) or Diabetes Mellitus, Ketosis-Prone (Topic) or Diabetes Mellitus, Ketosis Prone (Topic) or Ketosis-Prone Diabetes Mellitus (Topic) |
|  | 2 | Exercise* (All Fields) or Physical Activit* (Topic) or Activit*, Physical (Topic) or Exercise*, Physical (Topic) or Physical Exercise* (Topic) or Acute Exercise* (Topic) or Exercise*, Acute (Topic) or Exercise*, Isometric (Topic) or Isometric Exercise* (Topic) or Exercise*, Aerobic (Topic) or Aerobic Exercise* (Topic) or Exercise Training* (Topic) or Training*, Exercise (Topic) or Tai Chi (Topic) or Yoga (Topic) or Wuqinxi (Topic) or Baduanjin (Topic) or Yijinjing (Topic) or Kickboxing (Topic) or Pilates (Topic) |
|  | 3 | blood glucose (All Fields) or Blood Sugar (All Fields) or Sugar, Blood (All Fields) or Glucose, Blood (All Fields) or HbA1c (All Fields) OR glycated hemoglobin (All Fields) |
|  | 4 | Randomized controlled trial (All Fields) OR controlled clinical trial (All Fields) OR Clinical Trials, Randomized (All Fields) OR Trials, Randomized Clinical (All Fields) OR Controlled Clinical Trials, Randomized (All Fields) |
|  | 5 | #1 AND #2 AND #3 AND #4 |
| OVID | 1 | (Diabetes Mellitus, Type 1 or Diabetes Mellitus, Insulin-Dependent or Diabetes Mellitus, Insulin Dependent or Insulin-Dependent Diabetes Mellitus or Diabetes Mellitus, Juvenile-Onset or Diabetes Mellitus, Juvenile Onset or Juvenile-Onset Diabetes Mellitus or IDDM or Juvenile-Onset Diabet or Diabetes, Juvenile-Onset or Juvenile Onset Diabetes or Diabetes Mellitus, Sudden-Onset or Diabetes Mellitus, Sudden Onset or Sudden-Onset Diabetes Mellitus or Type 1 Diabetes Mellitus or Diabetes Mellitus, Insulin-Dependent, 1 or Insulin-Dependent Diabetes Mellitus 1 or Insulin Dependent Diabetes Mellitus 1 or Type 1 Diabetes or Diabetes, Type 1 or Diabetes Mellitus, Type 1 or Diabetes, Autoimmune or Autoimmune Diabetes or Diabetes Mellitus, Brittle or Brittle Diabetes Mellitus or Diabetes Mellitus, Ketosis-Prone or Diabetes Mellitus, Ketosis Prone or Ketosis-Prone Diabetes Mellitus).af. |
|  | 2 | (Exercise* or Physical Activit* or Activit*, Physical or Exercise*, Physical or Physical Exercise* or Acute Exercise* or Exercise*, Acute or Exercise*, Isometric or Isometric Exercise* or Exercise*, Aerobic or Aerobic Exercise* or Exercise Training* or Training*, Exercise or Tai Chi or Yoga or Wuqinxi or Baduanjin or Yijinjing or Kickboxing or Pilates).af. |
|  | 3 | (blood glucose or Blood Sugar or Sugar, Blood or Glucose, Blood or HbA1c or glycated hemoglobin).af. |
|  | 4 | (Randomized controlled trial or controlled clinical trial or Clinical Trials, Randomized or Trials, Randomized Clinical or Controlled Clinical Trials, Randomized or randomized or placebo or randomly).af. |
|  | 5 | #1 AND #2 AND #3 AND #4 |

**Supplementary Figure S1** Forest plot of BMI


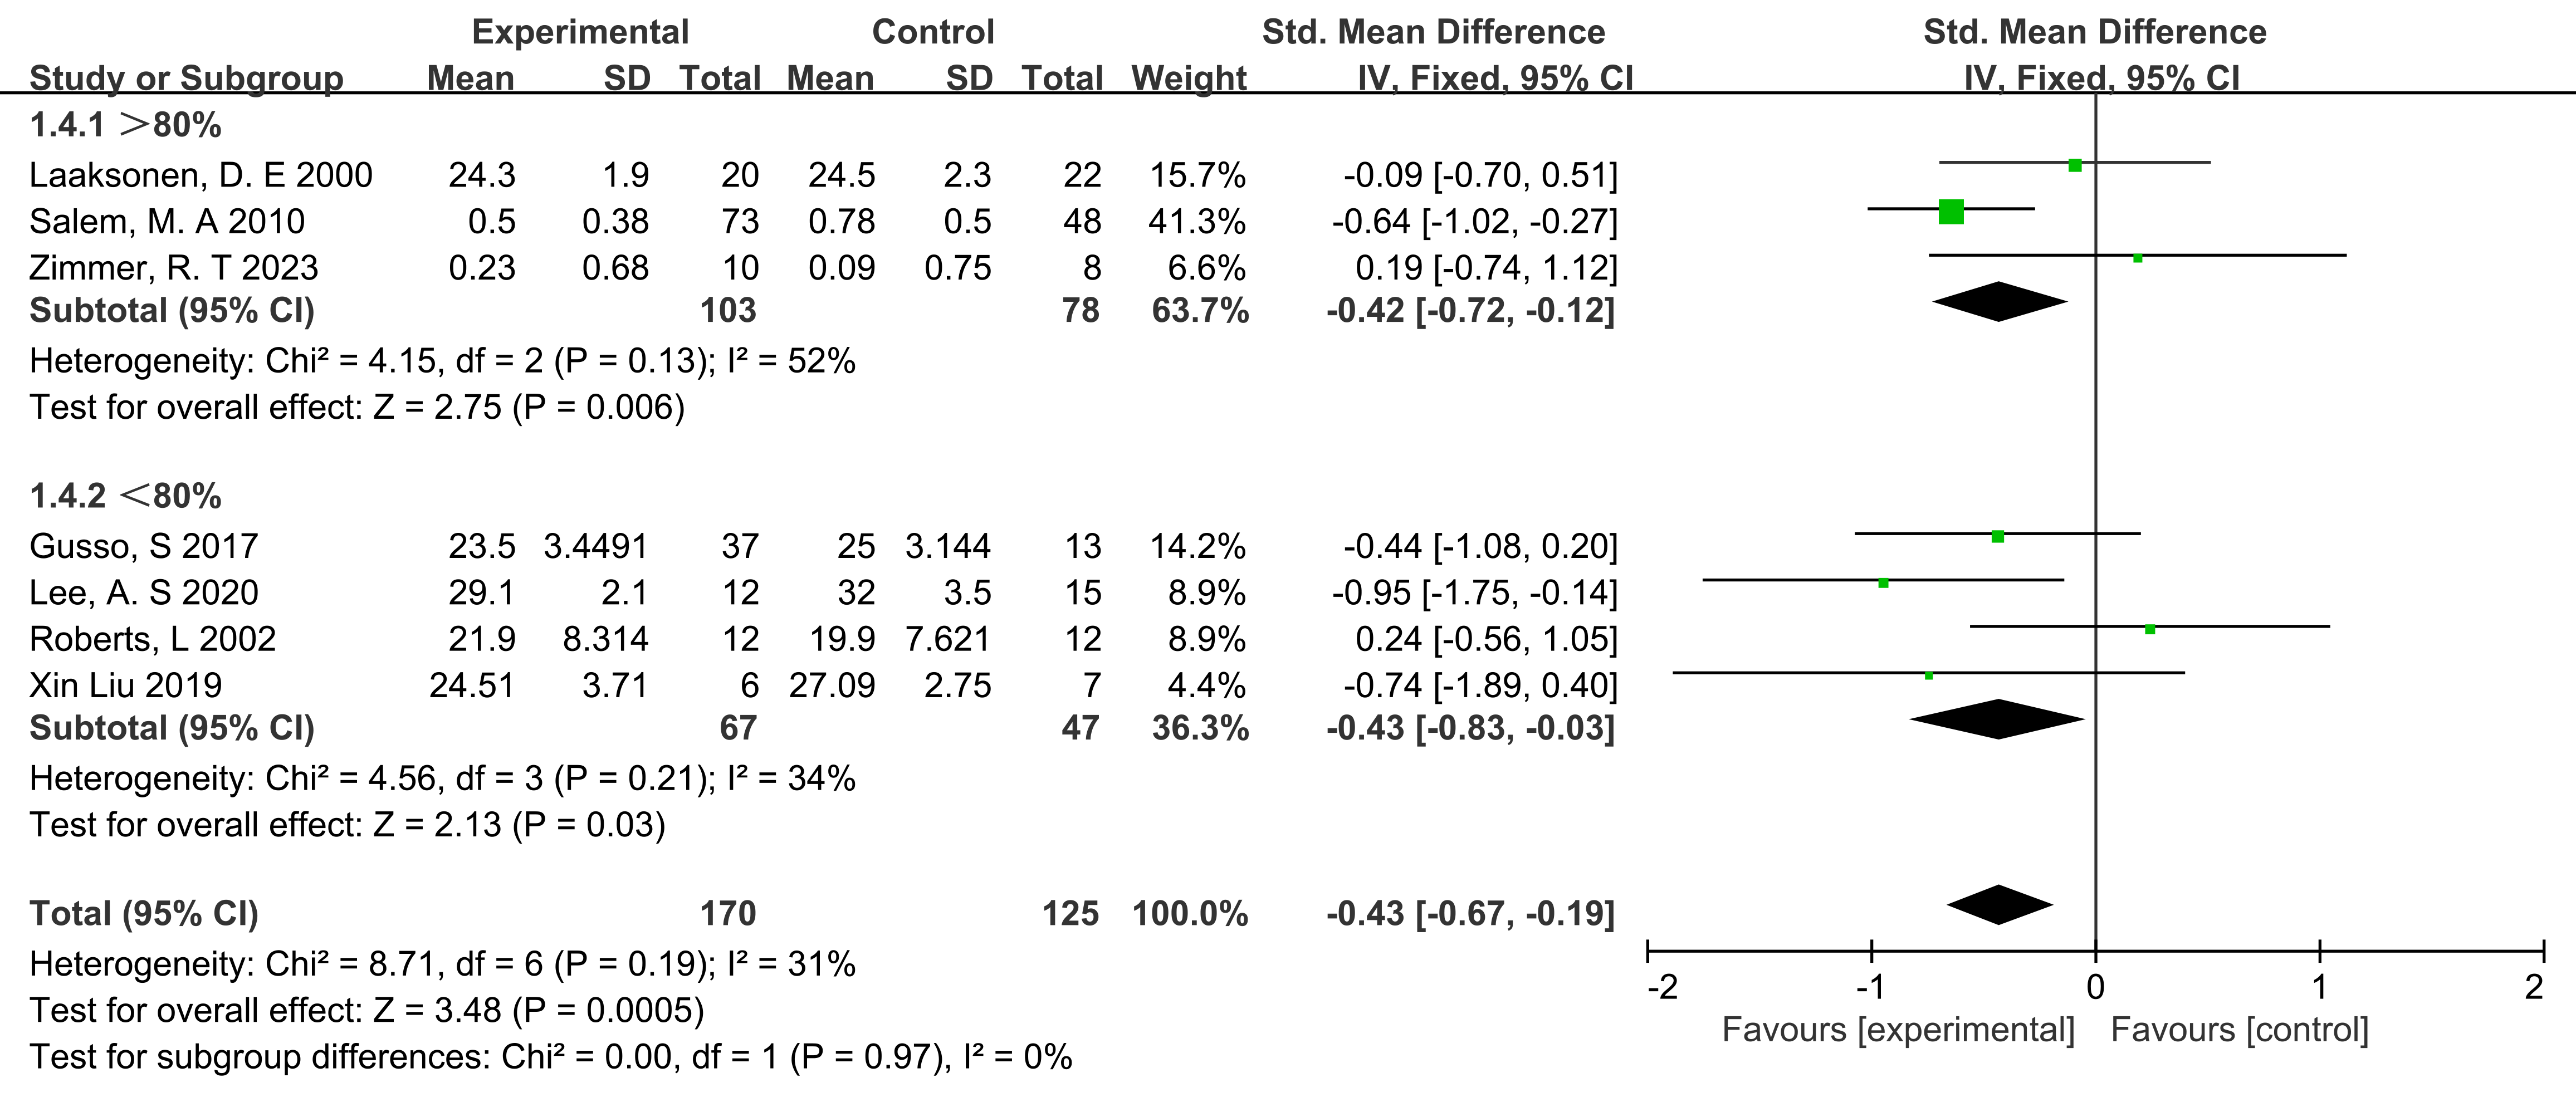


**Note:** Forest plot of BMI: High adherence to ACSM recommendations (>80%) vs. low or uncertain adherence to ACSM recommendations (<80%). Due to low heterogeneity (l2 = 31%), a fixed-effects model was used. Data are presented as standardized mean difference because the units are inconsistent between indicators.

Overal result: A total of 295 participants were included (125 in the control group and 170 in the experimental group). Exercise had a significant improvement on BMI in patients with T1DM (SMD: -0.43 [95% CI: -0.67, -0.19], P = 0.0005).

SUBGROUP ANALYSIS: Exercise with high adherence to ACSM (SMD: -0.42 [95%Cl: -0.72, -0.12], I2 = 52%, P = 0.006) showed no significant difference than those with low or uncertain adherence (SMD: -0.43 [95% CI: -0.83, -0.03], I2 = 34%, P = 0.03).

**Supplementary Figure S2** Funnel plot of BMI


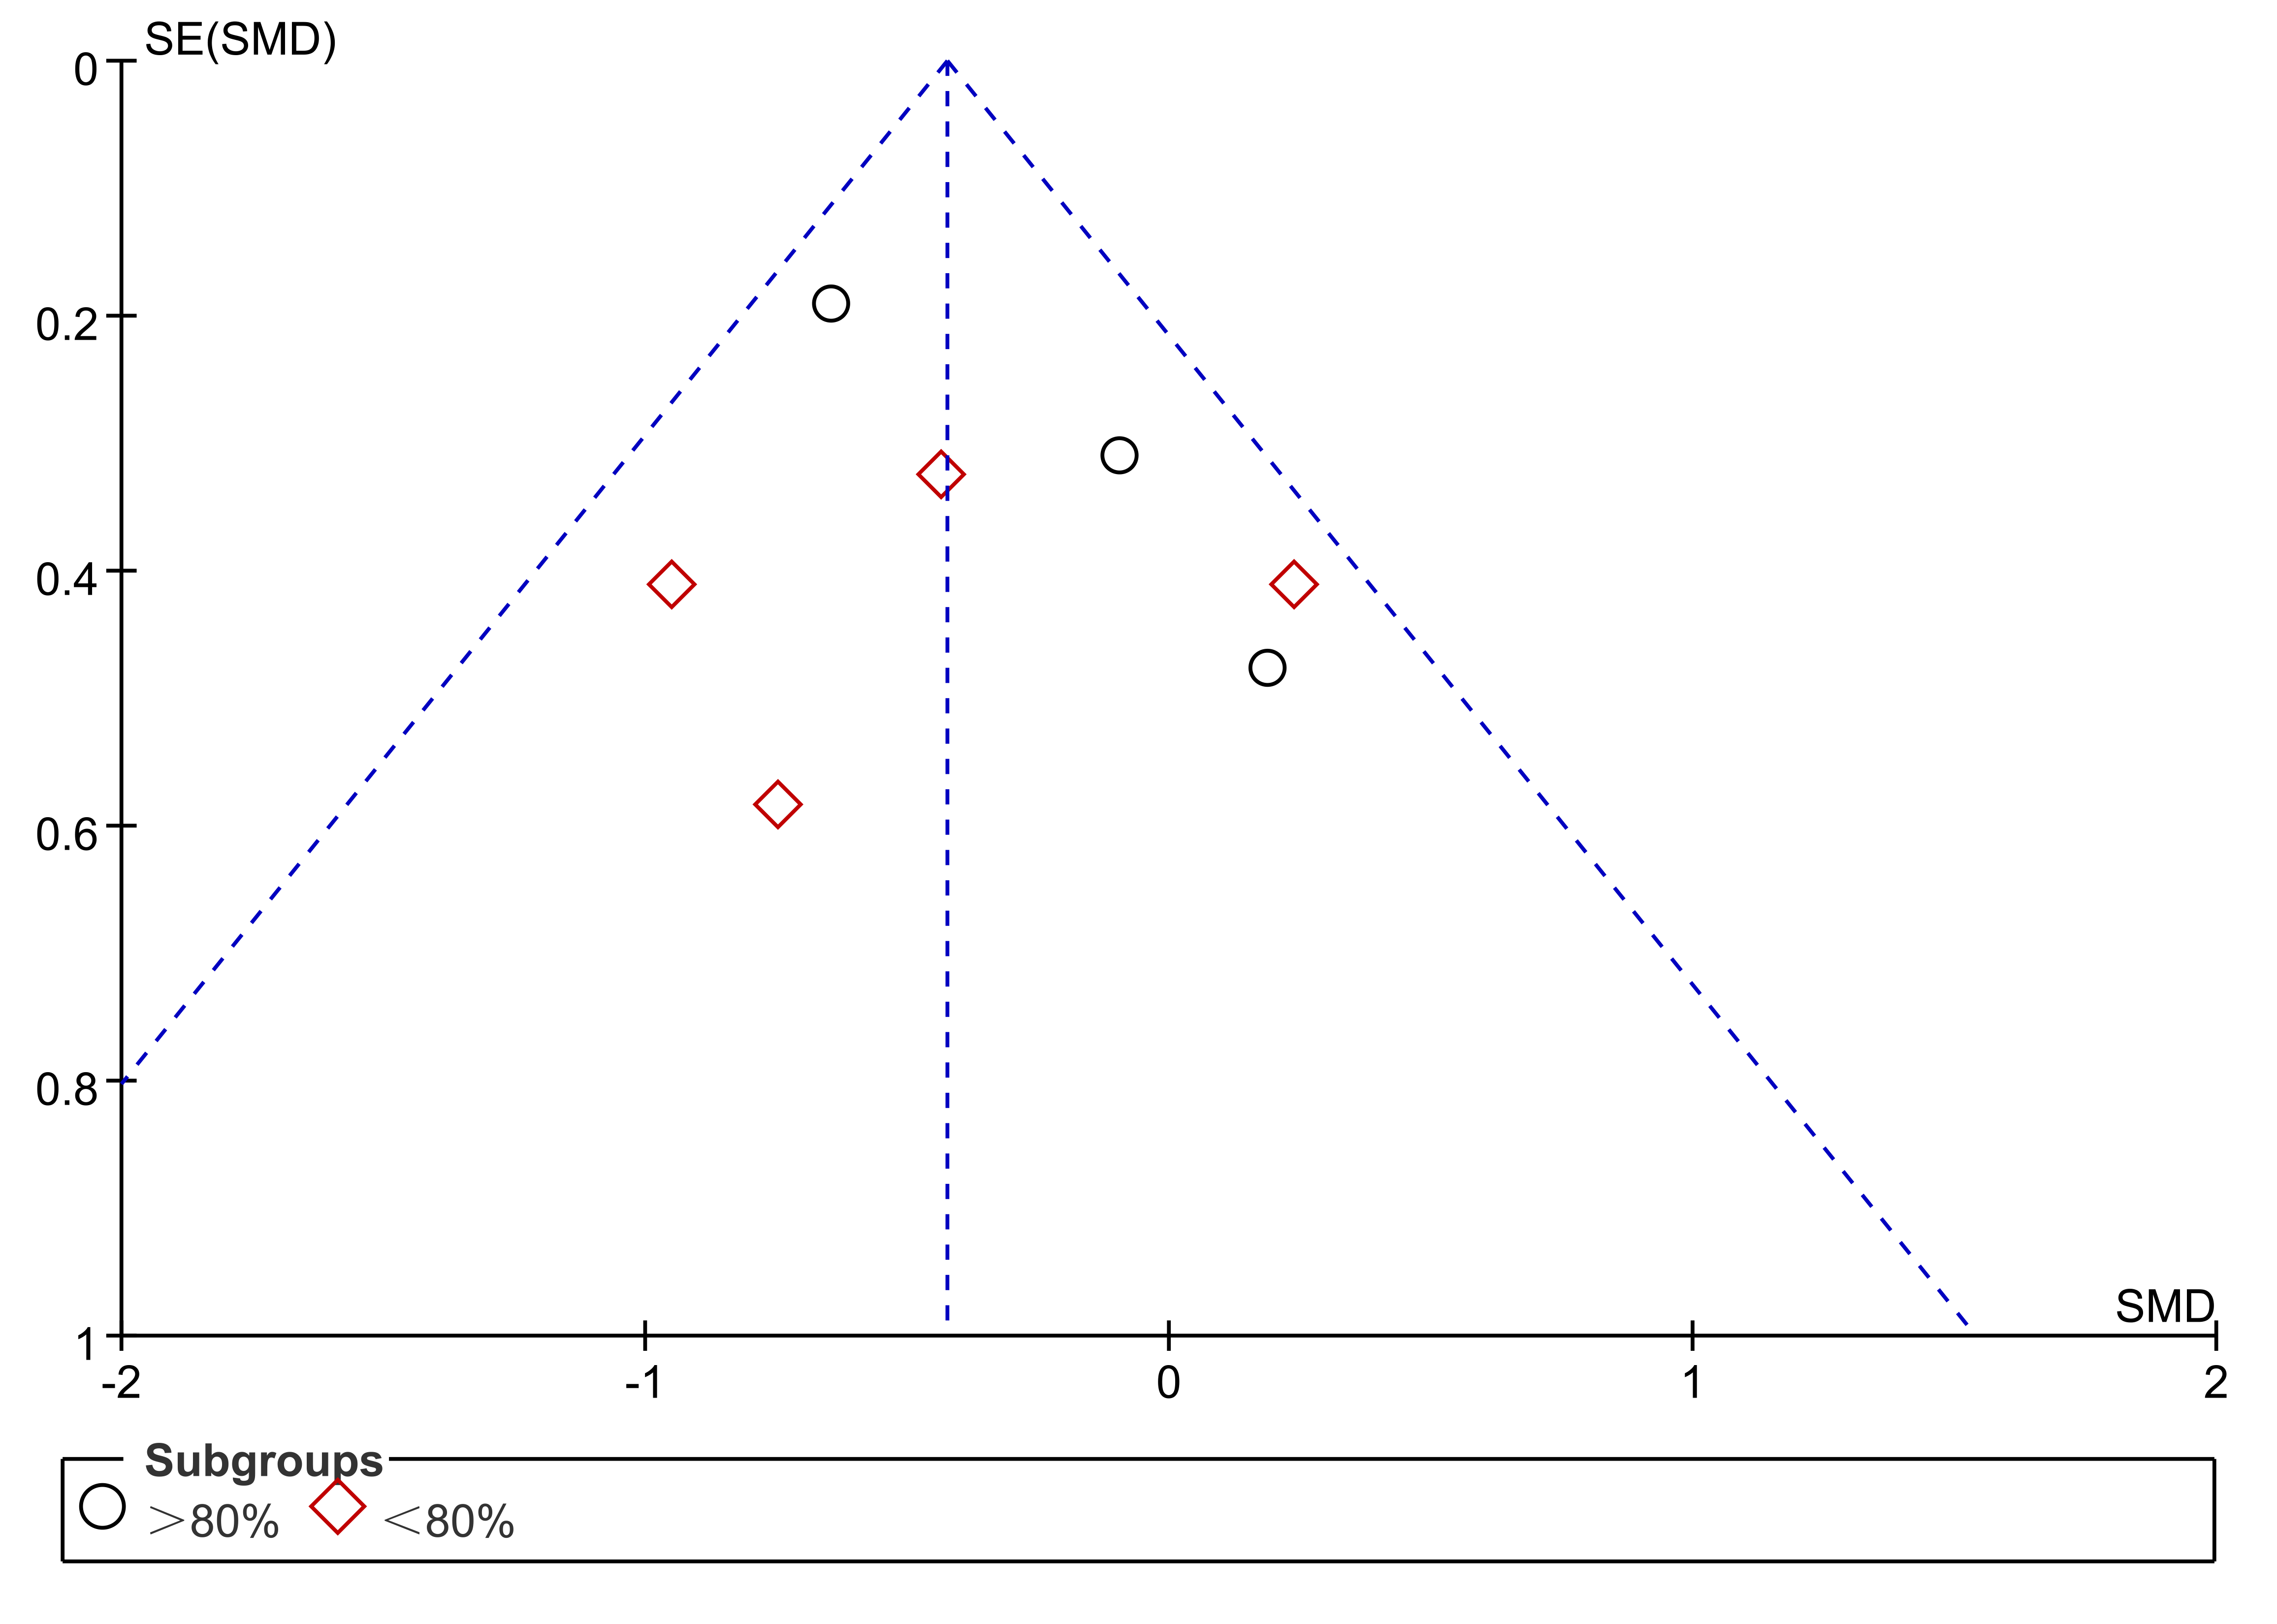


**Note****:** Symmetric funnel plots showed no publication bias. >80% means studies with High adherence to ACSM recommendations . <80% means studies with low or uncertain adherence to ACSM recommendations. SE, standard error; SMD, standardized mean difference.

**Supplementary Figure S3** Sensitivity analyses of BMI


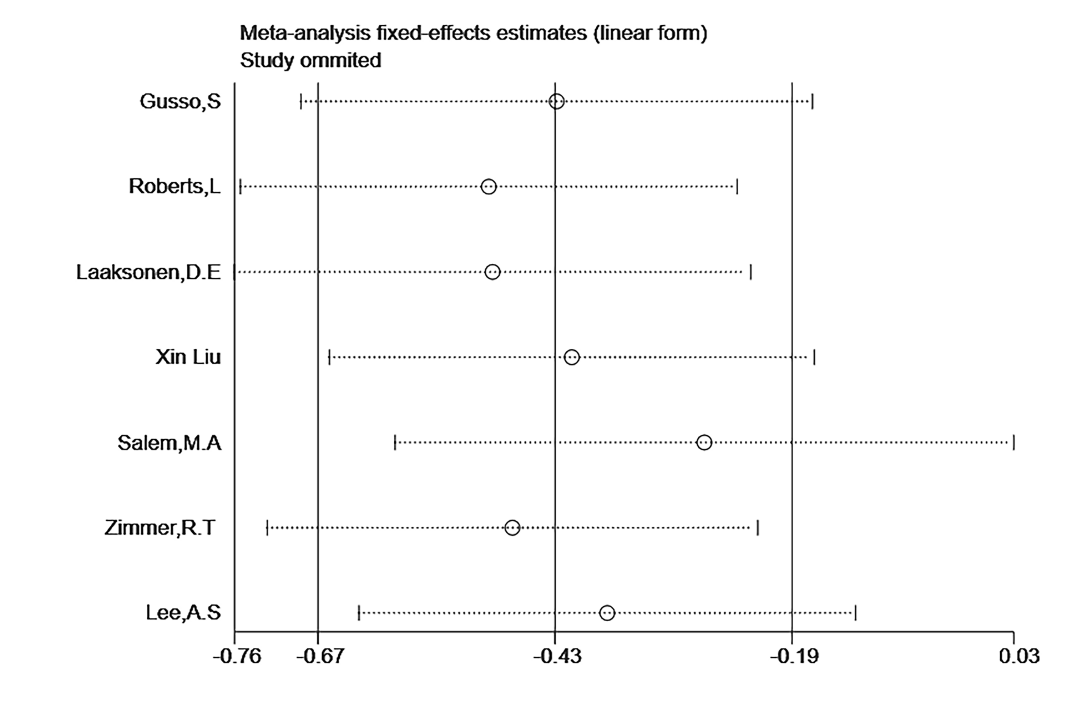


**Note:** The literature was eliminated one by one and the results showed that none of the studies had a greater impact on the overall.

**2.1 Supplementary Figure S4** Forest plot of Triglyceride


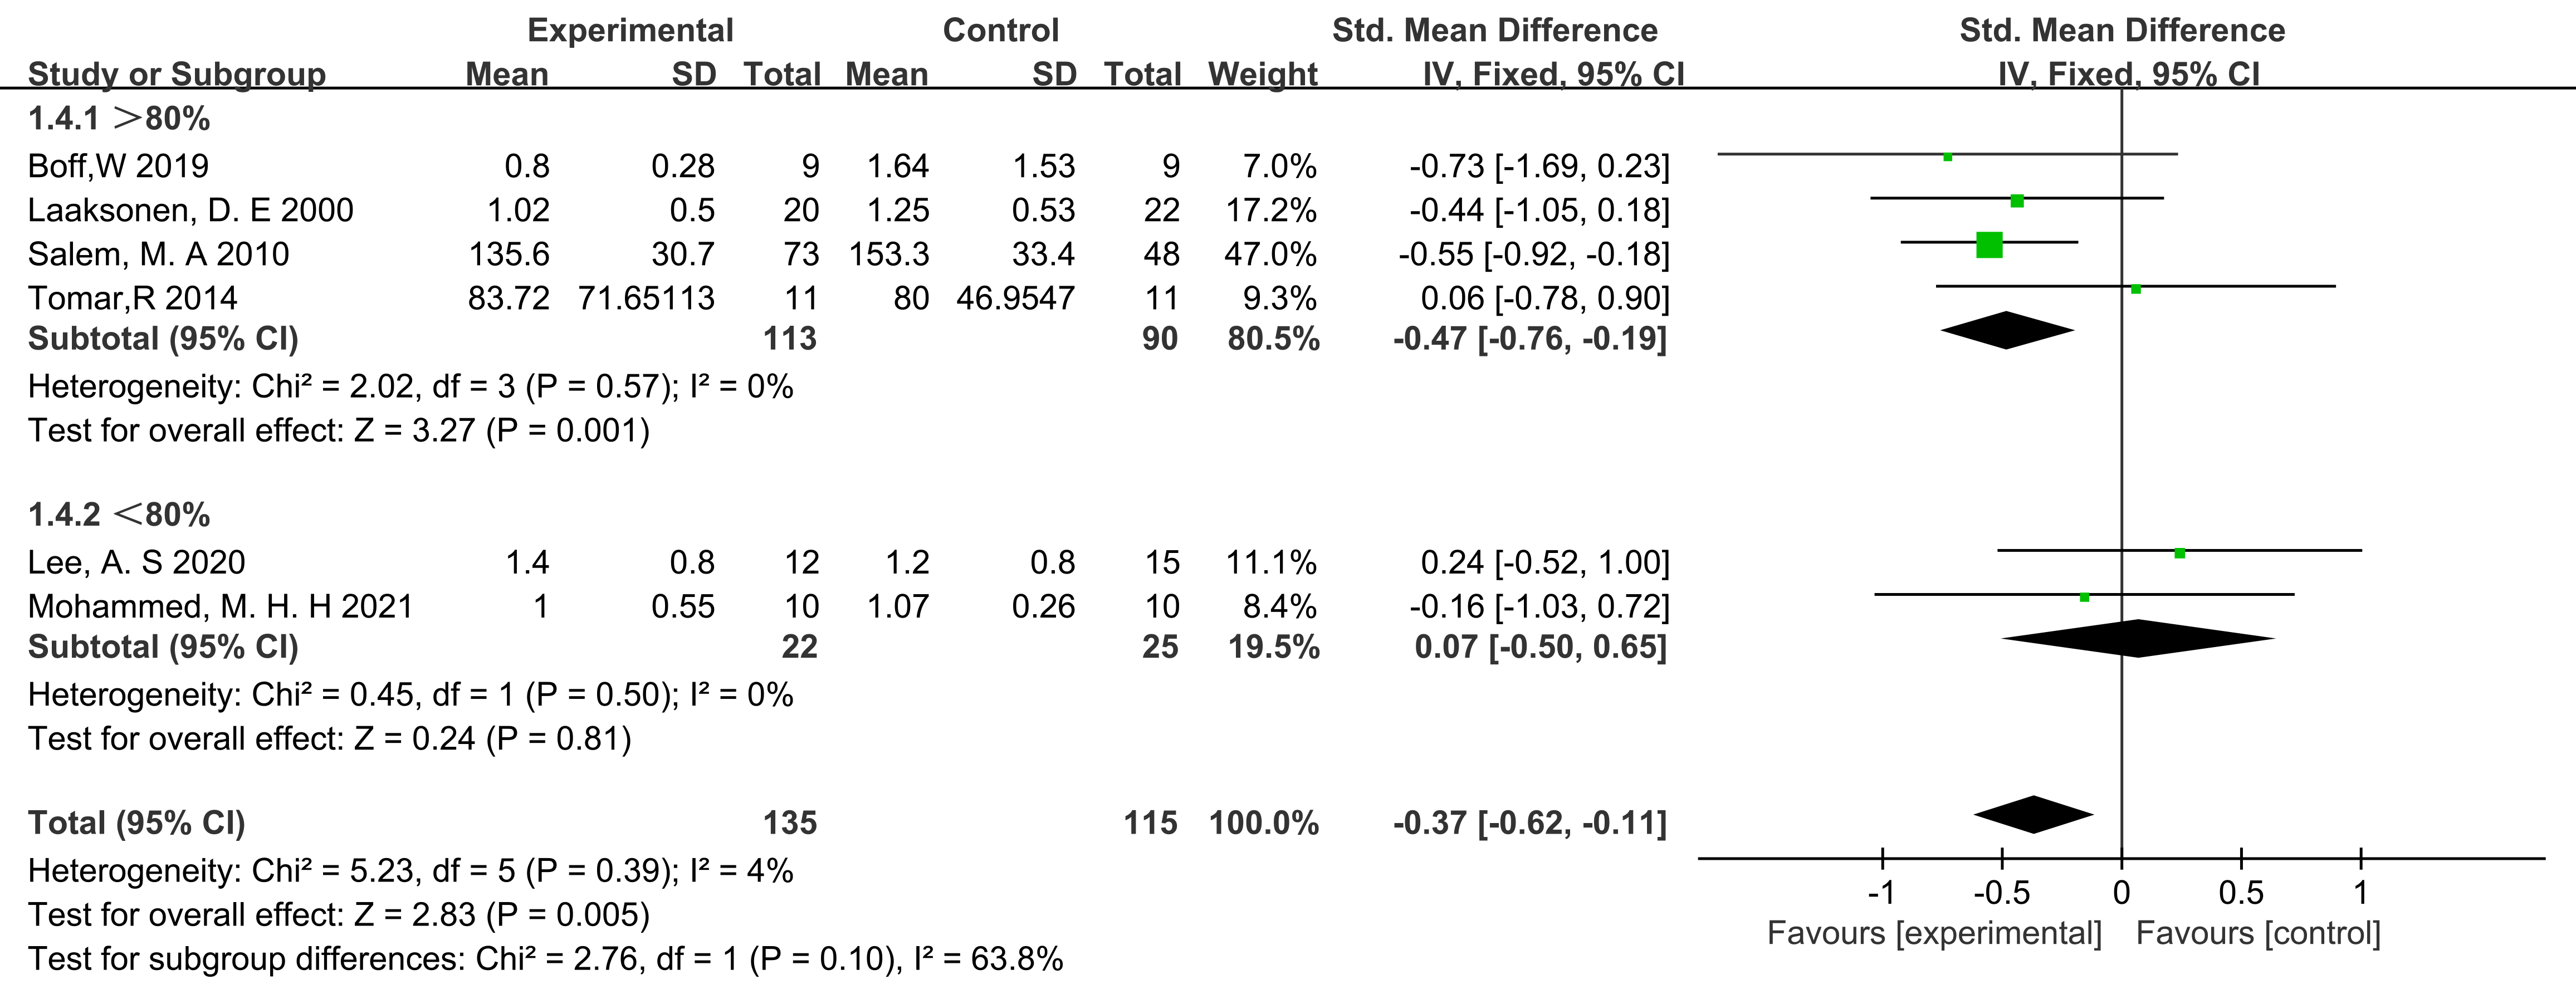


**Note:** Forest plot of Triglyceride: High adherence to ACSM recommendations (>80%) vs. low or uncertain adherence to ACSM recommendations (<80%). Due to non-significant heterogeneity (l2 =4%), a fixed effect model was used. Data are presented as standardized mean difference because the units are inconsistent between indicators.

Overal result: A total of 250 participants were included (115 in the control group and 135 in the experimental group). Exercise had a significant improvement on Triglyceride in patients with T1DM (SMD: -0.37 [95%Cl: -0.62, -0.11], I2 = 4%, p = 0.005).

SUBGROUP ANALYSIS: The high adherence subgroup (SMD: -0.47 [-0.76, -0.19], I2= 0%, p = 0.001) had a significant effect on lowing Triglyceride levels, while the low adherence subgroup (SMD: 0.07[-0.50, 0.65], I2 = 0%, p=0.81) had no significant effect on Triglyceride.

**Supplementary Figure S5** Funnel plot of Triglyceride


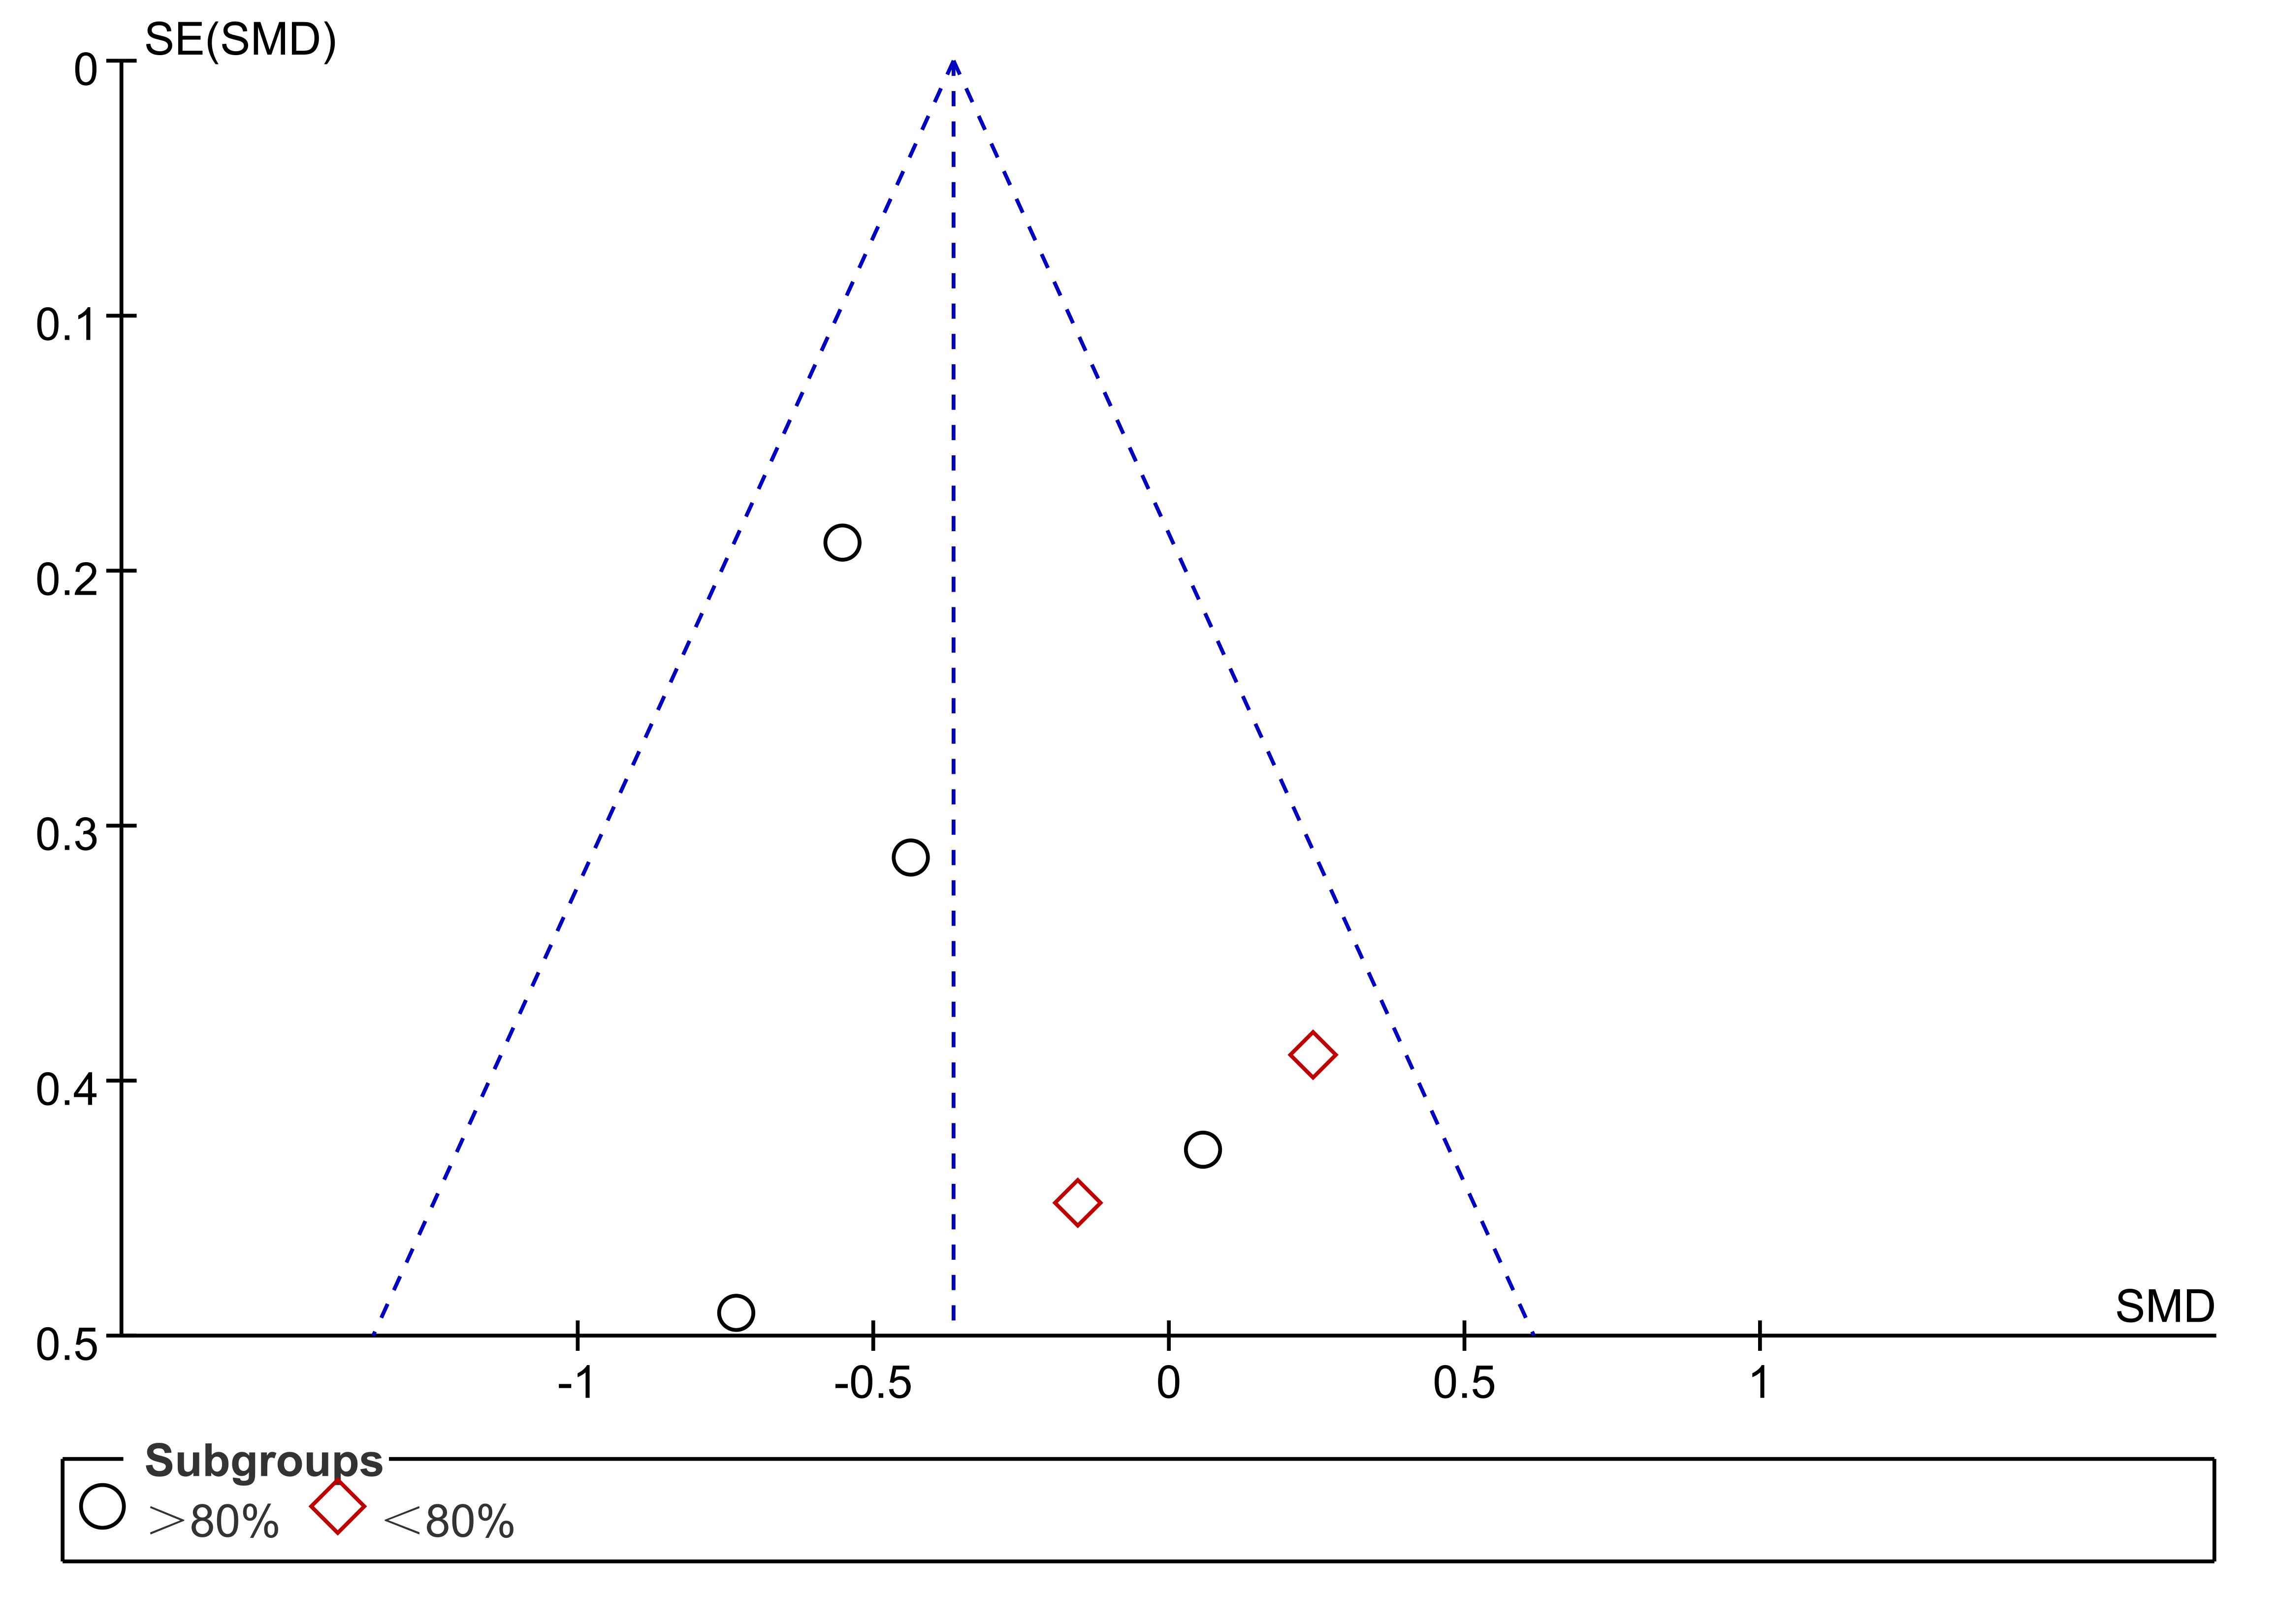


**Note:** Symmetric funnel plots showed no publication bias. >80% means studies with High adherence to ACSM recommendations . <80% means studies with low or uncertain adherence to ACSM recommendations. SE, standard error; SMD, standardized mean difference.

**Supplementary Figure S6** Sensitivity analyses of Triglyceride


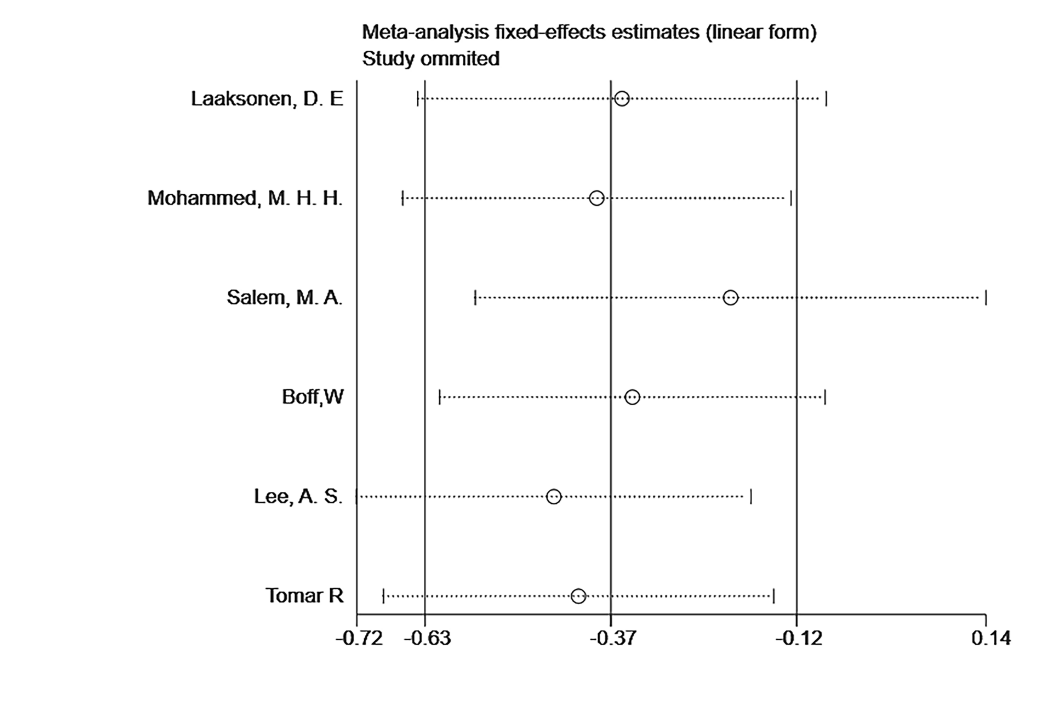


**Note:** The literature was eliminated one by one and the results showed that none of the studies had a greater impact on the overall.

**Supplementary Figure S7** Forest plot of VO2max


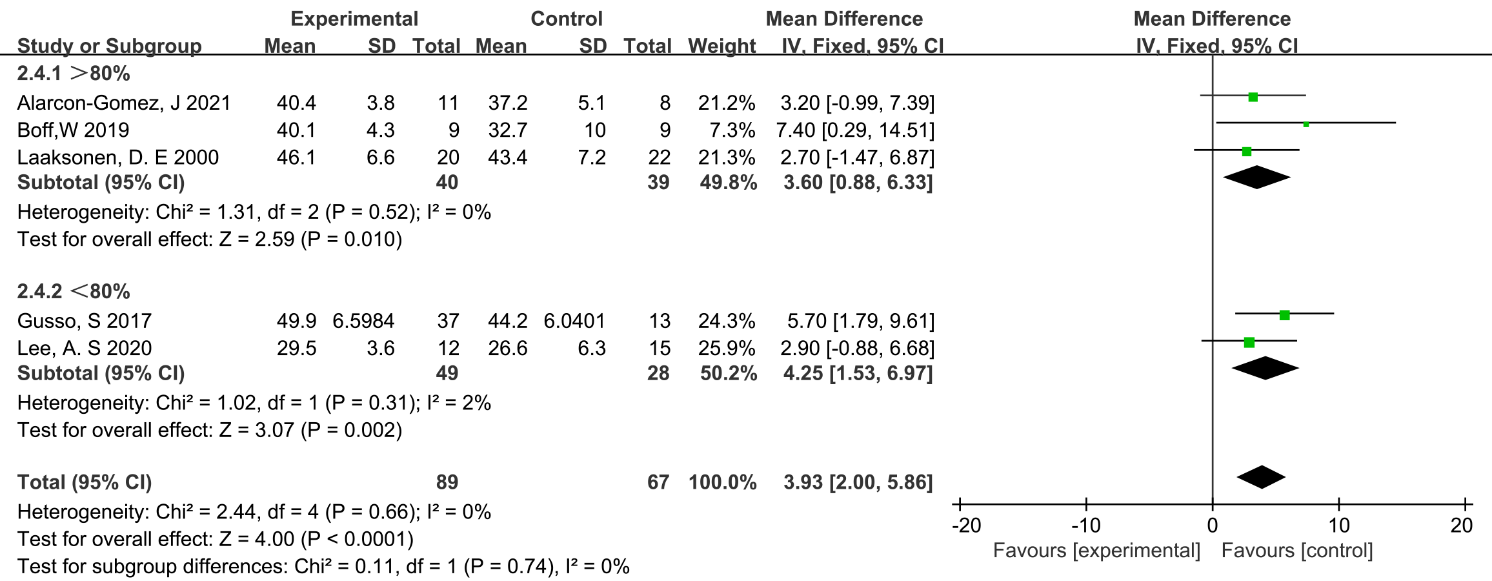


**Note:** Forest plot of VO2max: High adherence to ACSM recommendations (>80%) vs. low or uncertain adherence to ACSM recommendations (<80%). Due to non-significant heterogeneity (I2 = 0%), a fixed effect model was used. Data are presented as weighted mean difference because indicators and units of measurement are harmonized

Overal result: A total of 156 participants were included (67 in the control group and 89 in the experimental group). Exercise had a significant improvement on VO2max in patients with T1DM (WMD: 3,93 [95%Cl: 2.00, 5.86], I2= 0%, p < 0.0001).

SUBGROUP ANALYSIS: Both Exercise with high adherence to ACSM (WMD: 3.60 [95%Cl: 0.88, 6.33, I2= 0%, p = 0.010) and low adherence (WMD: 4.25 [95%Cl: 1.53, 6.97], I2 = 2%, p=0.002) had significant effect on improving VO2max.

**Supplementary Figure S8** Funnel plot of VO2max


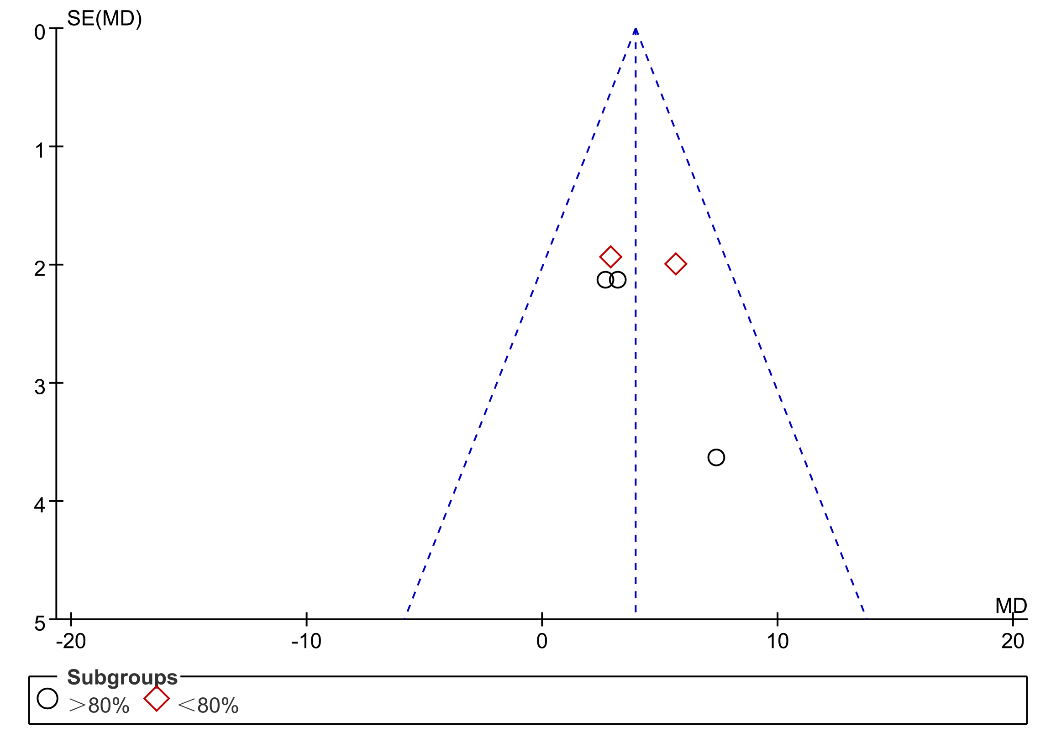


**Note:** Symmetric funnel plots showed no publication bias. ＞80% means studies with High adherence to ACSM recommendations . ＜80% means studies with low or uncertain adherence to ACSM recommendations. SE, standard error; MD, mean difference.

**Supplementary Figure S9** Sensitivity analyses of VO2max


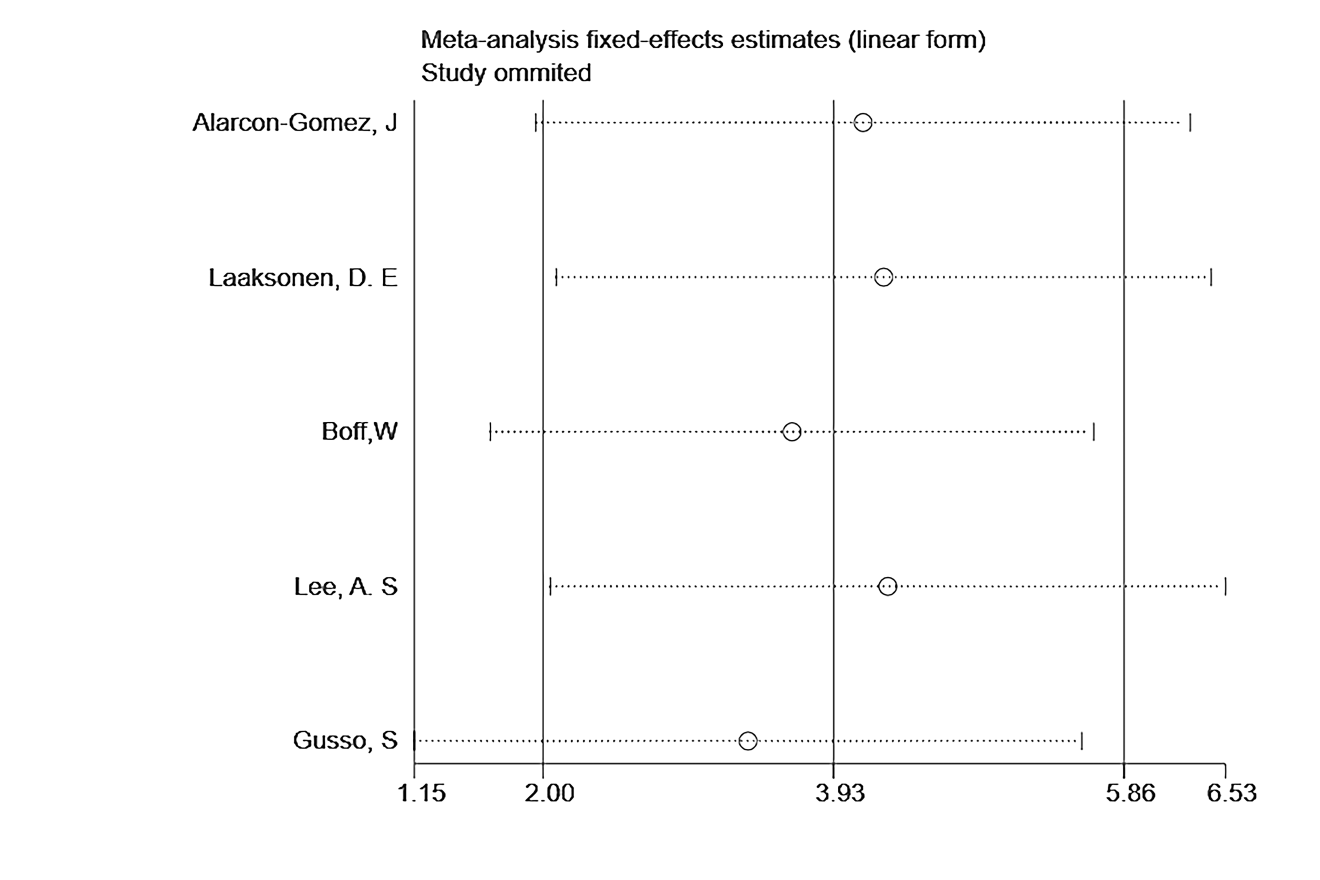


**Note:** The literature was eliminated one by one and the results showed that none of the studies had a greater impact on the overall.

**Supplementary Figure S10** Forest plot of Insulin dose


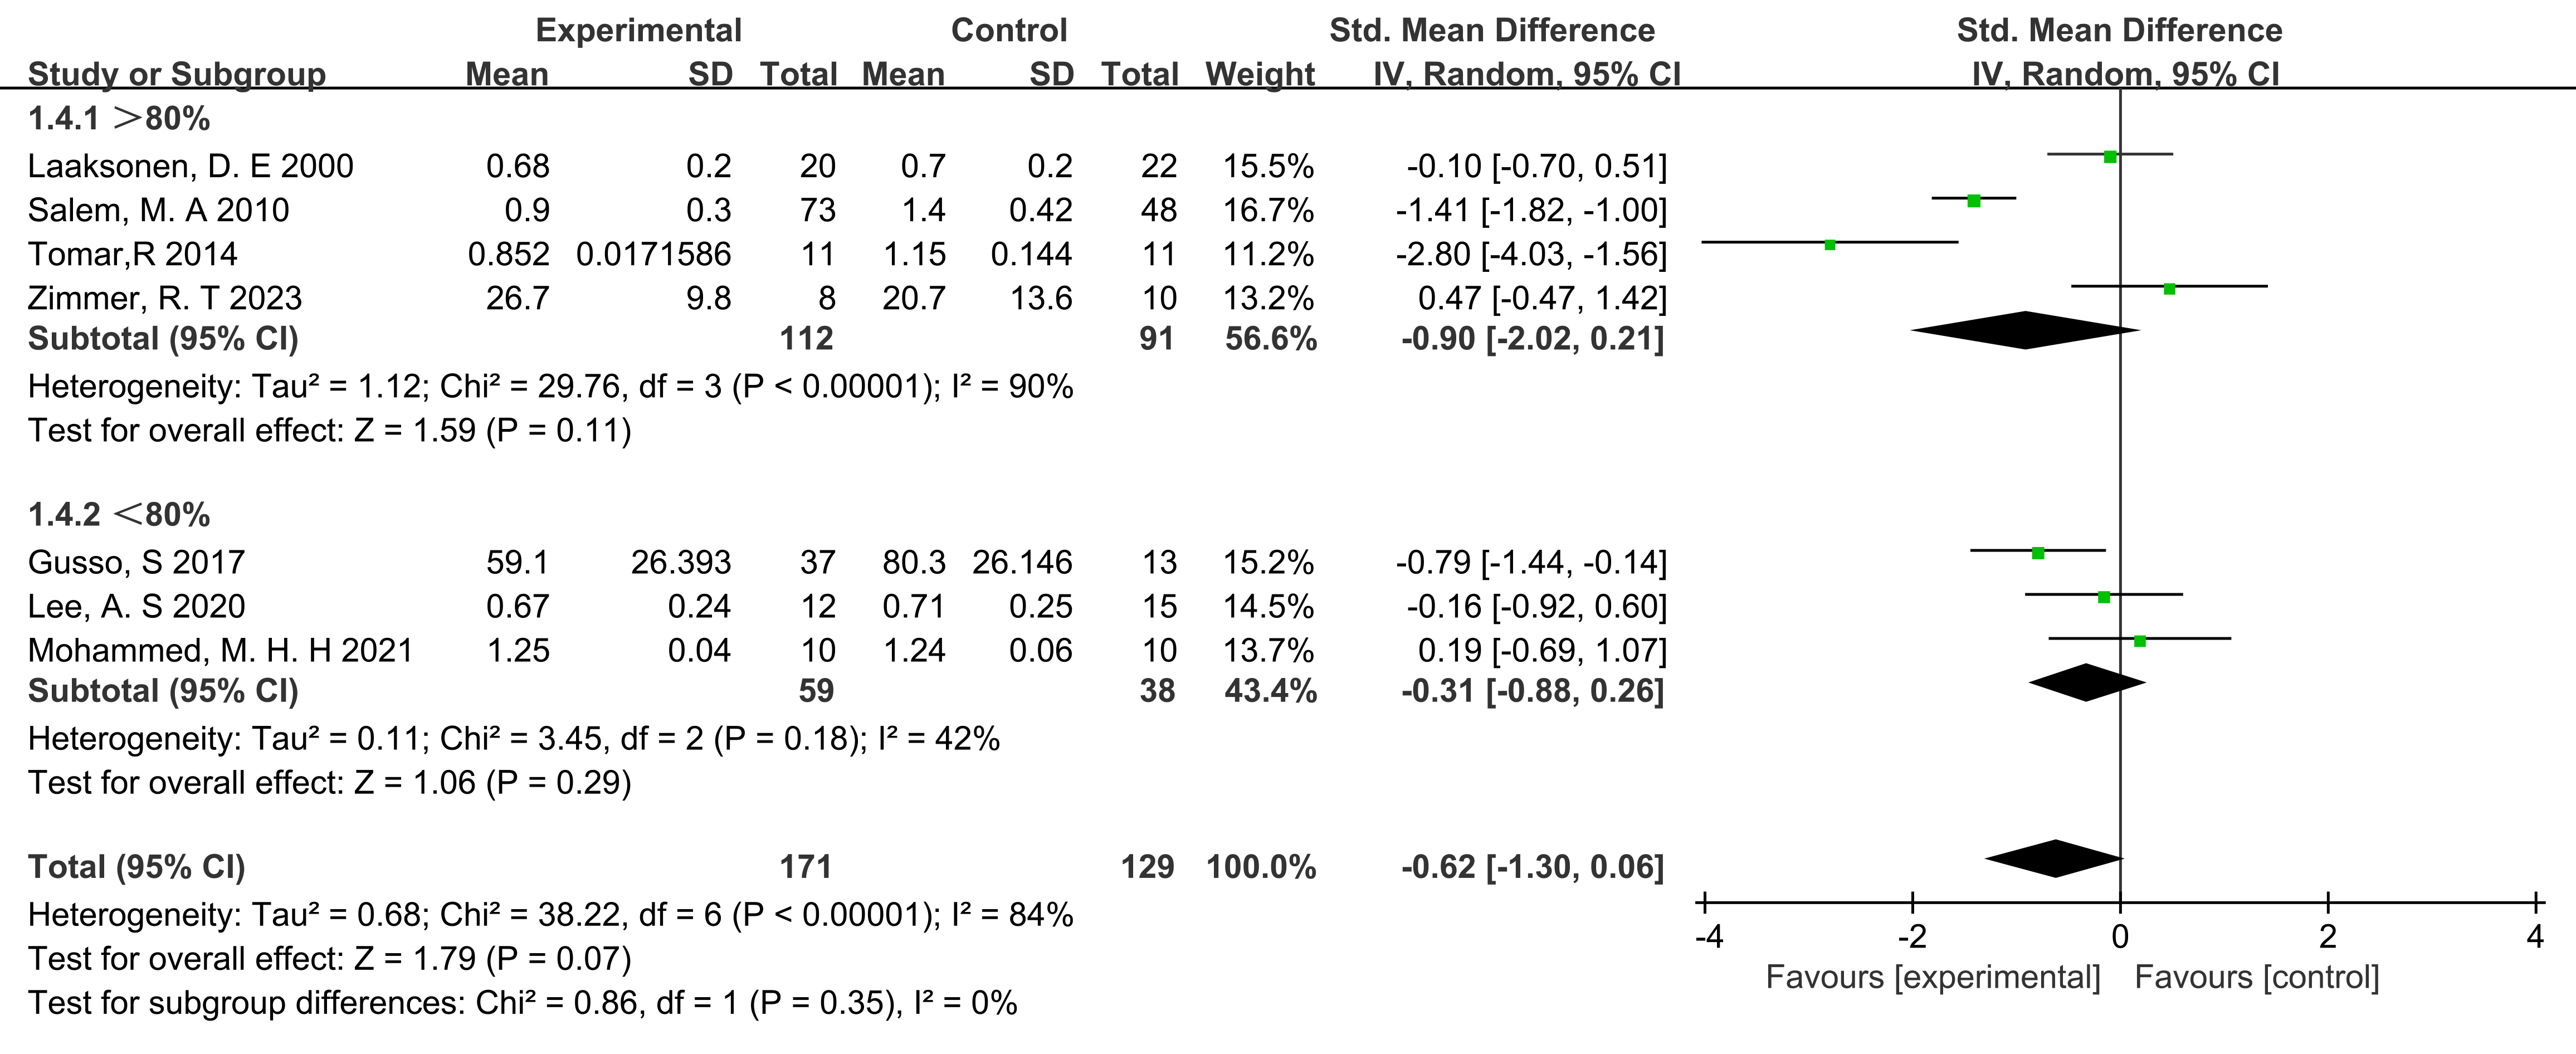


**Note:** Forest plot of Insulin dose: High adherence to ACSM recommendations (>80%) vs. low or uncertain adherence to ACSM recommendations (<80%). Due to high heterogeneity (I2 = 84%), a random effect model was used. Data are presented as standardized mean difference because the units are inconsistent between indicators.

Overal result: A total of 300 participants were included (129 in the control group and 171 in the experimental group). Exercise had a significant improvement on Insulin dose in patients with T1DM (SMD: -0.62 [95%Cl: -1.30, 0.06], I2= 84%, p = 0.07).

SUBGROUP ANALYSIS: Neither the subgroup with high adherence to ACSM (SMD: -0.90 [95%Cl: -2.02, 0.21], I2 = 90%, p = 0.11) nor the subgroup with low adherence (SMD: -0.31 [95%Cl: -0.88, 0.26], I2 = 42%, p = 0.29, had a significant effect on insulin does.

**Supplementary Figure S11** Funnel plot of Insulin dose


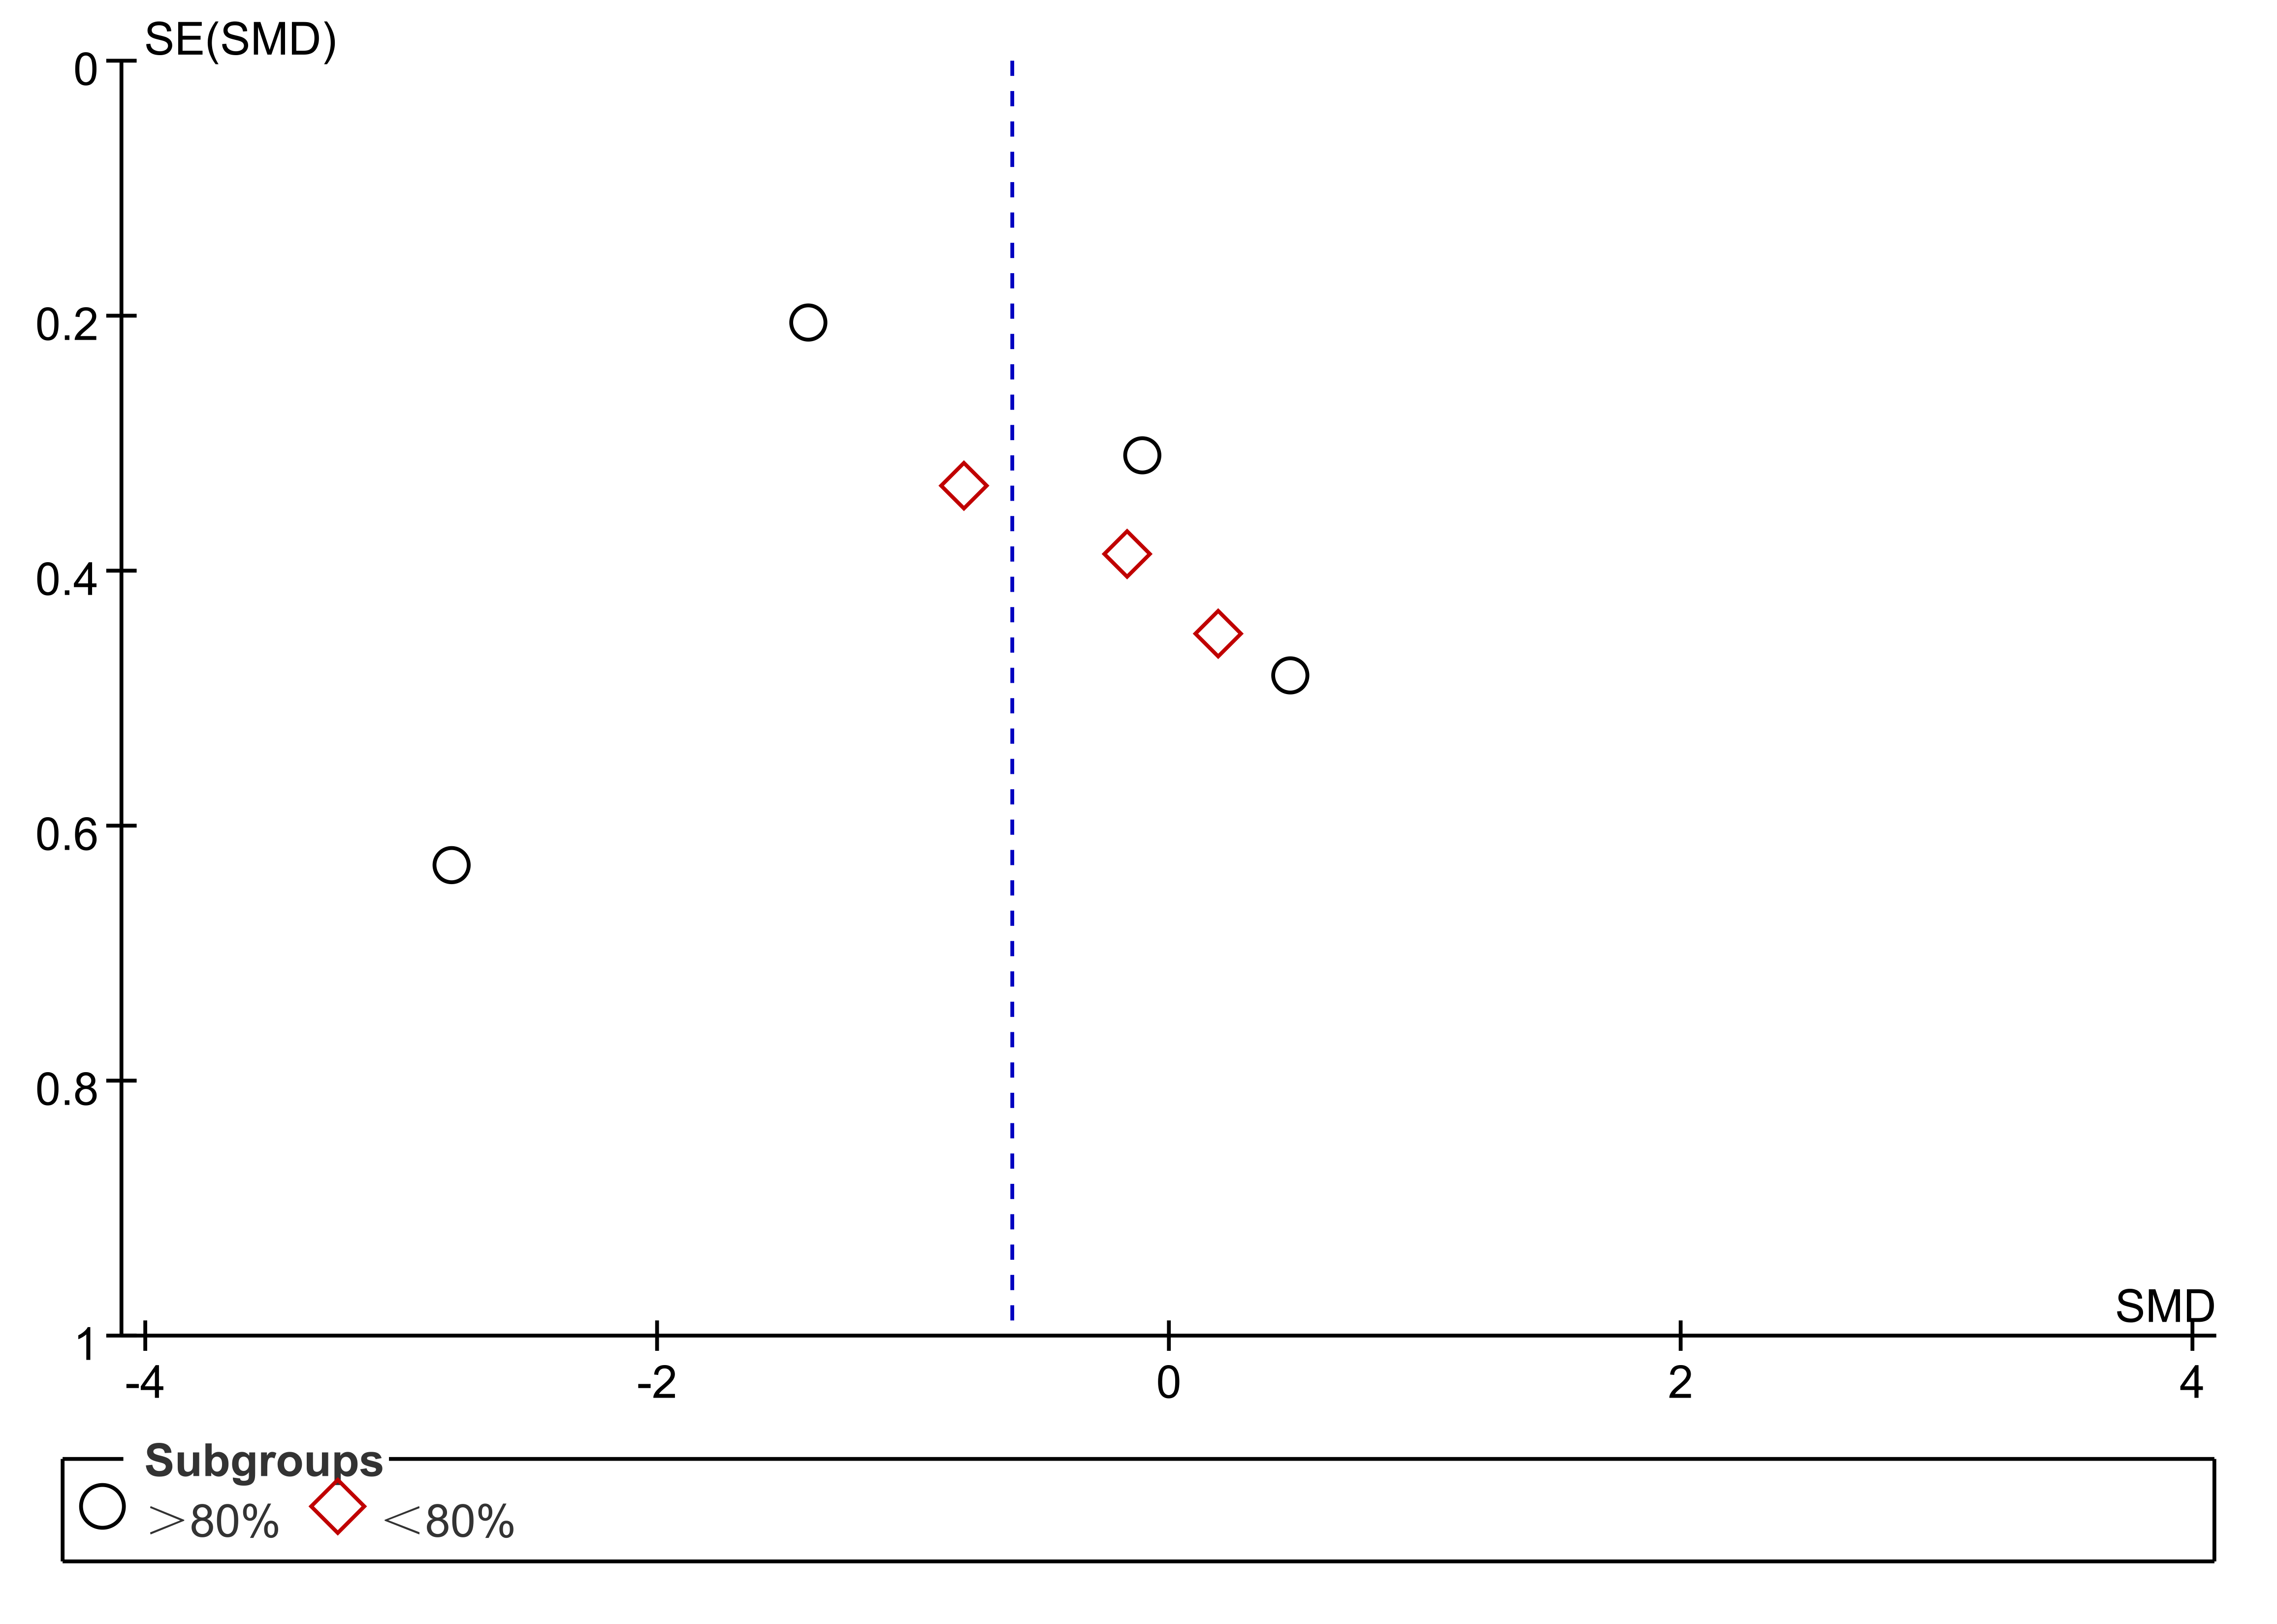


**Note:** Symmetric funnel plots showed no publication bias. >80% means studies with High adherence to ACSM recommendations . <80% means studies with low or uncertain adherence to ACSM recommendations. SE, standard error; SMD, standardized mean difference.

**Supplementary Figure S12** Sensitivity analyses of Insulin dose.


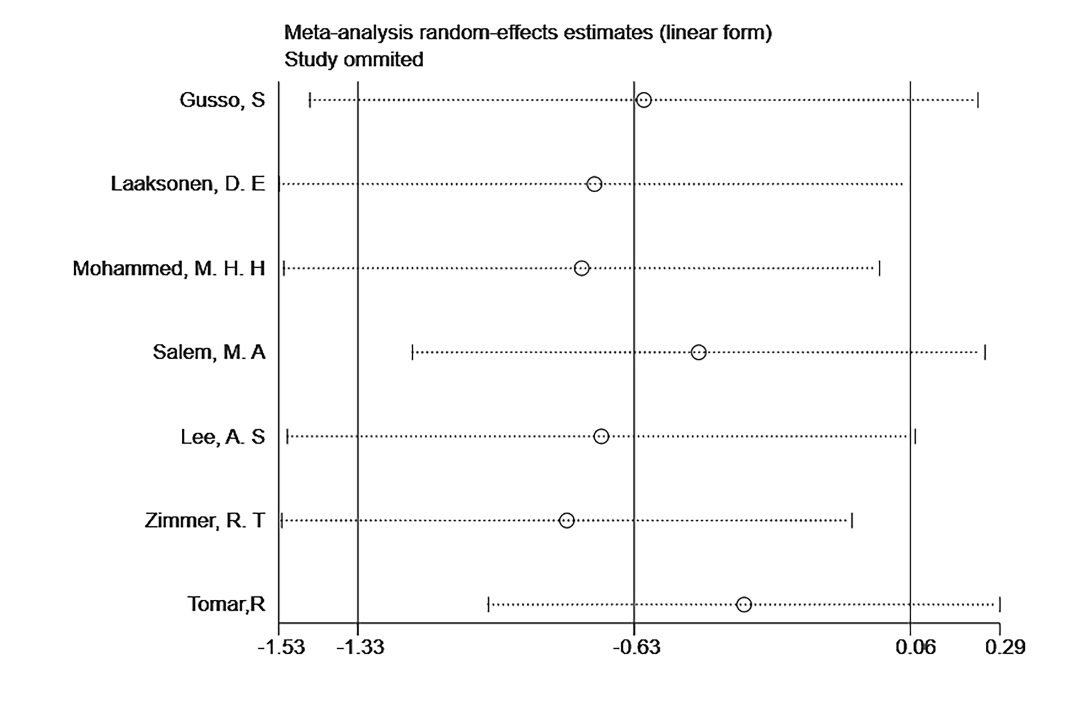


**Note:** The literature was eliminated one by one and the results showed that none of the studies had a greater impact on the overall.

**Supplementary Figure S13** Forest plot of Serum total cholesterol (TC)


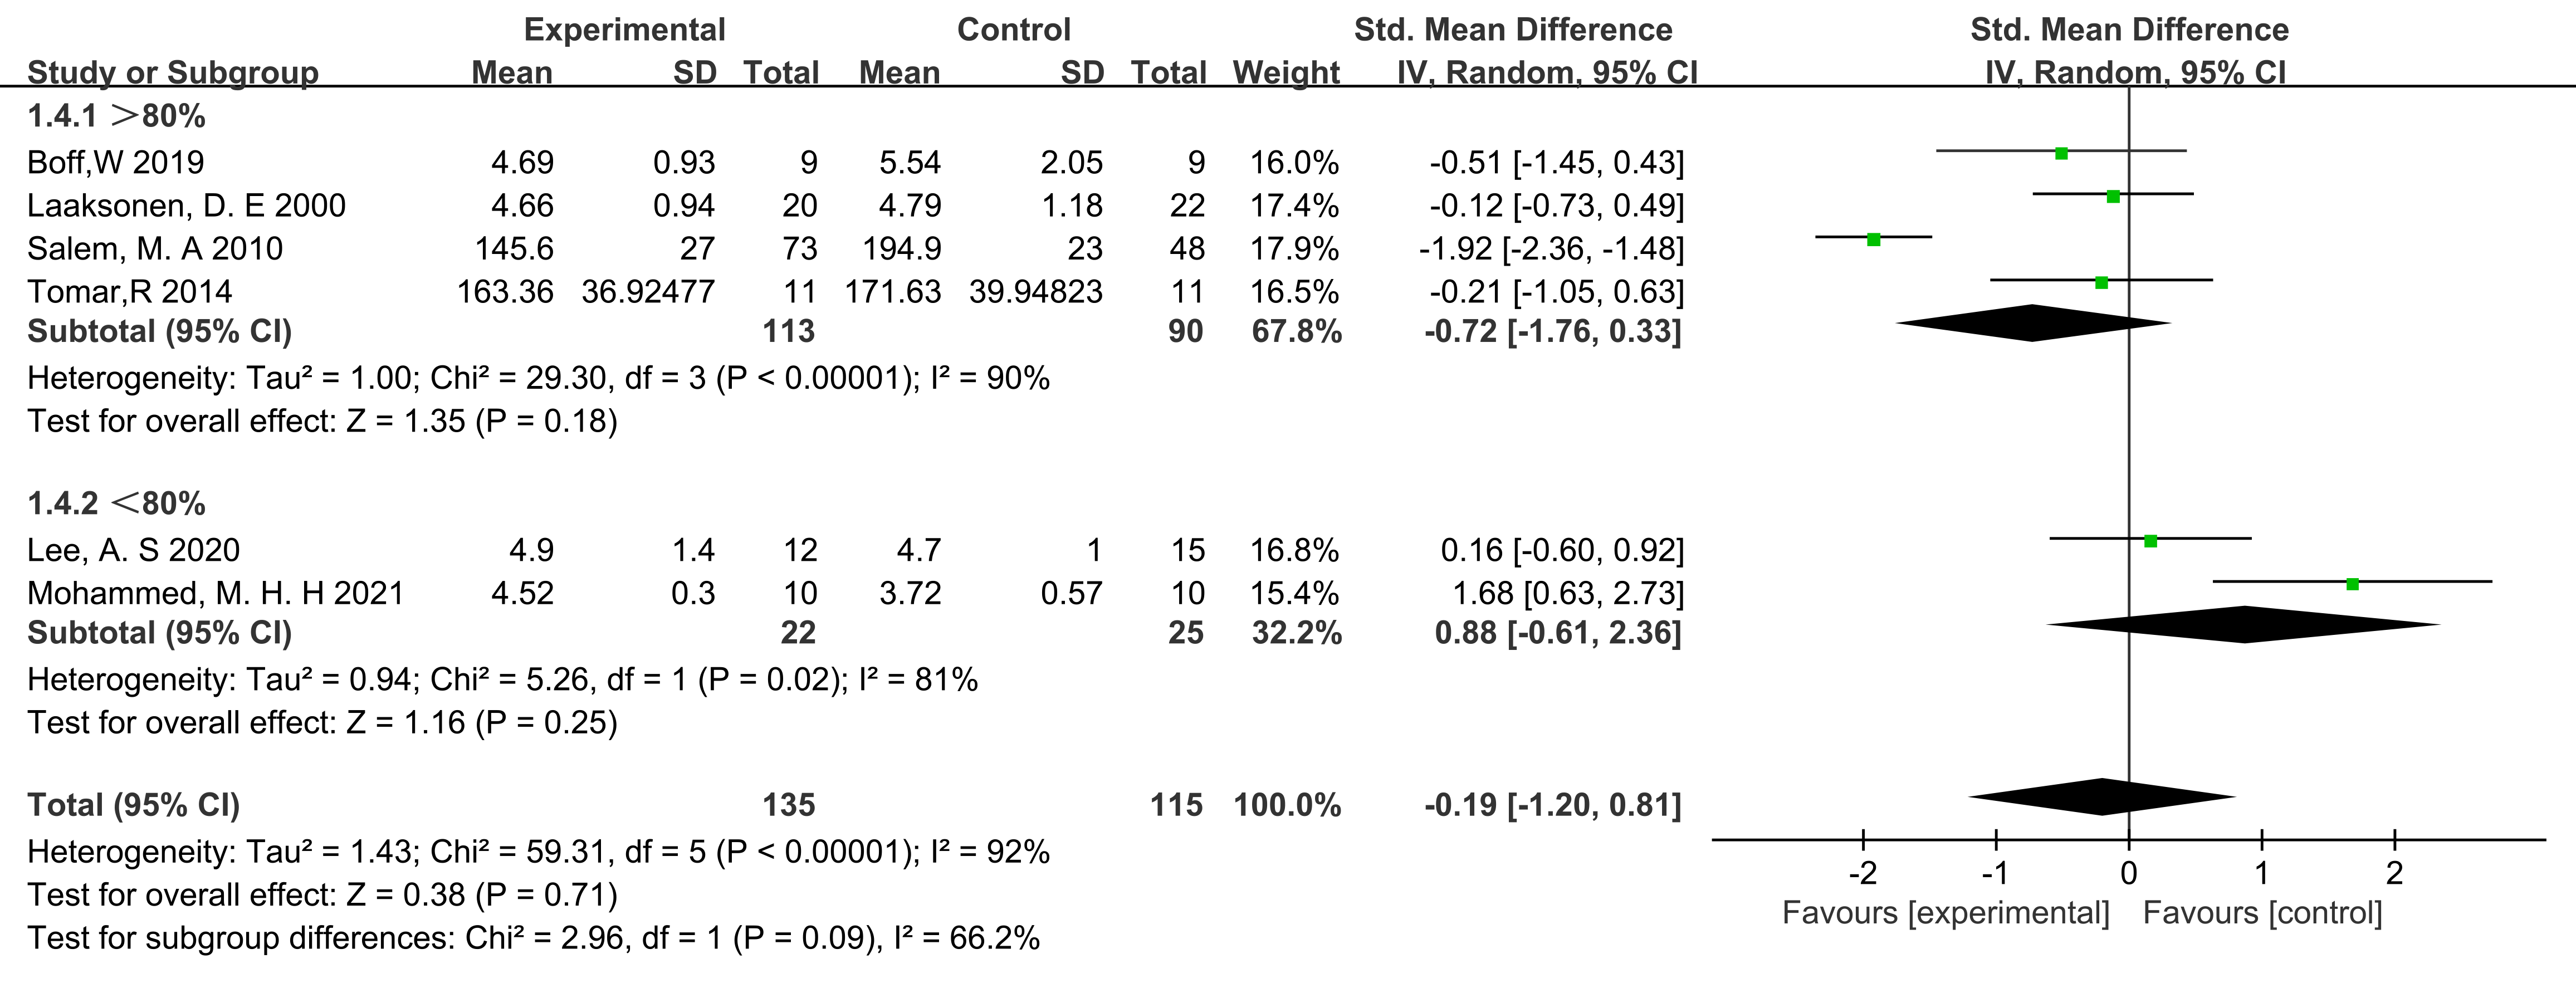


**Note:** Forest plot of total cholesterol (TC): High adherence to ACSM recommendations (>80%) vs. low or uncertain adherence to ACSM recommendations (<80%). Due to high heterogeneity (I2 = 92%), a random effect model was used. Data are presented as standardized mean difference because the units are inconsistent between indicators.

Overal result: A total of 250 participants were included (115 in the control group and 135 in the experimental group). Exercise had no significant improvement on TC in patients with T1DM (SMD: -0.19 [95%Cl: -1.20, 0.81], I2 = 92%, p = 0.71).

SUBGROUP ANALYSIS: Neither the subgroup with high adherence to ACSM (SMD: -0.72 [95%Cl: -1.76, 0.33], I2 = 90%, P = 0.18) nor the subgroup with low adherence (SMD: 0.88 [95%Cl: -0.61, 2.36], I2 = 81%, p = 0.25) had a significant effect on TC.

**Supplementary Figure S14** Funnel plot of TC


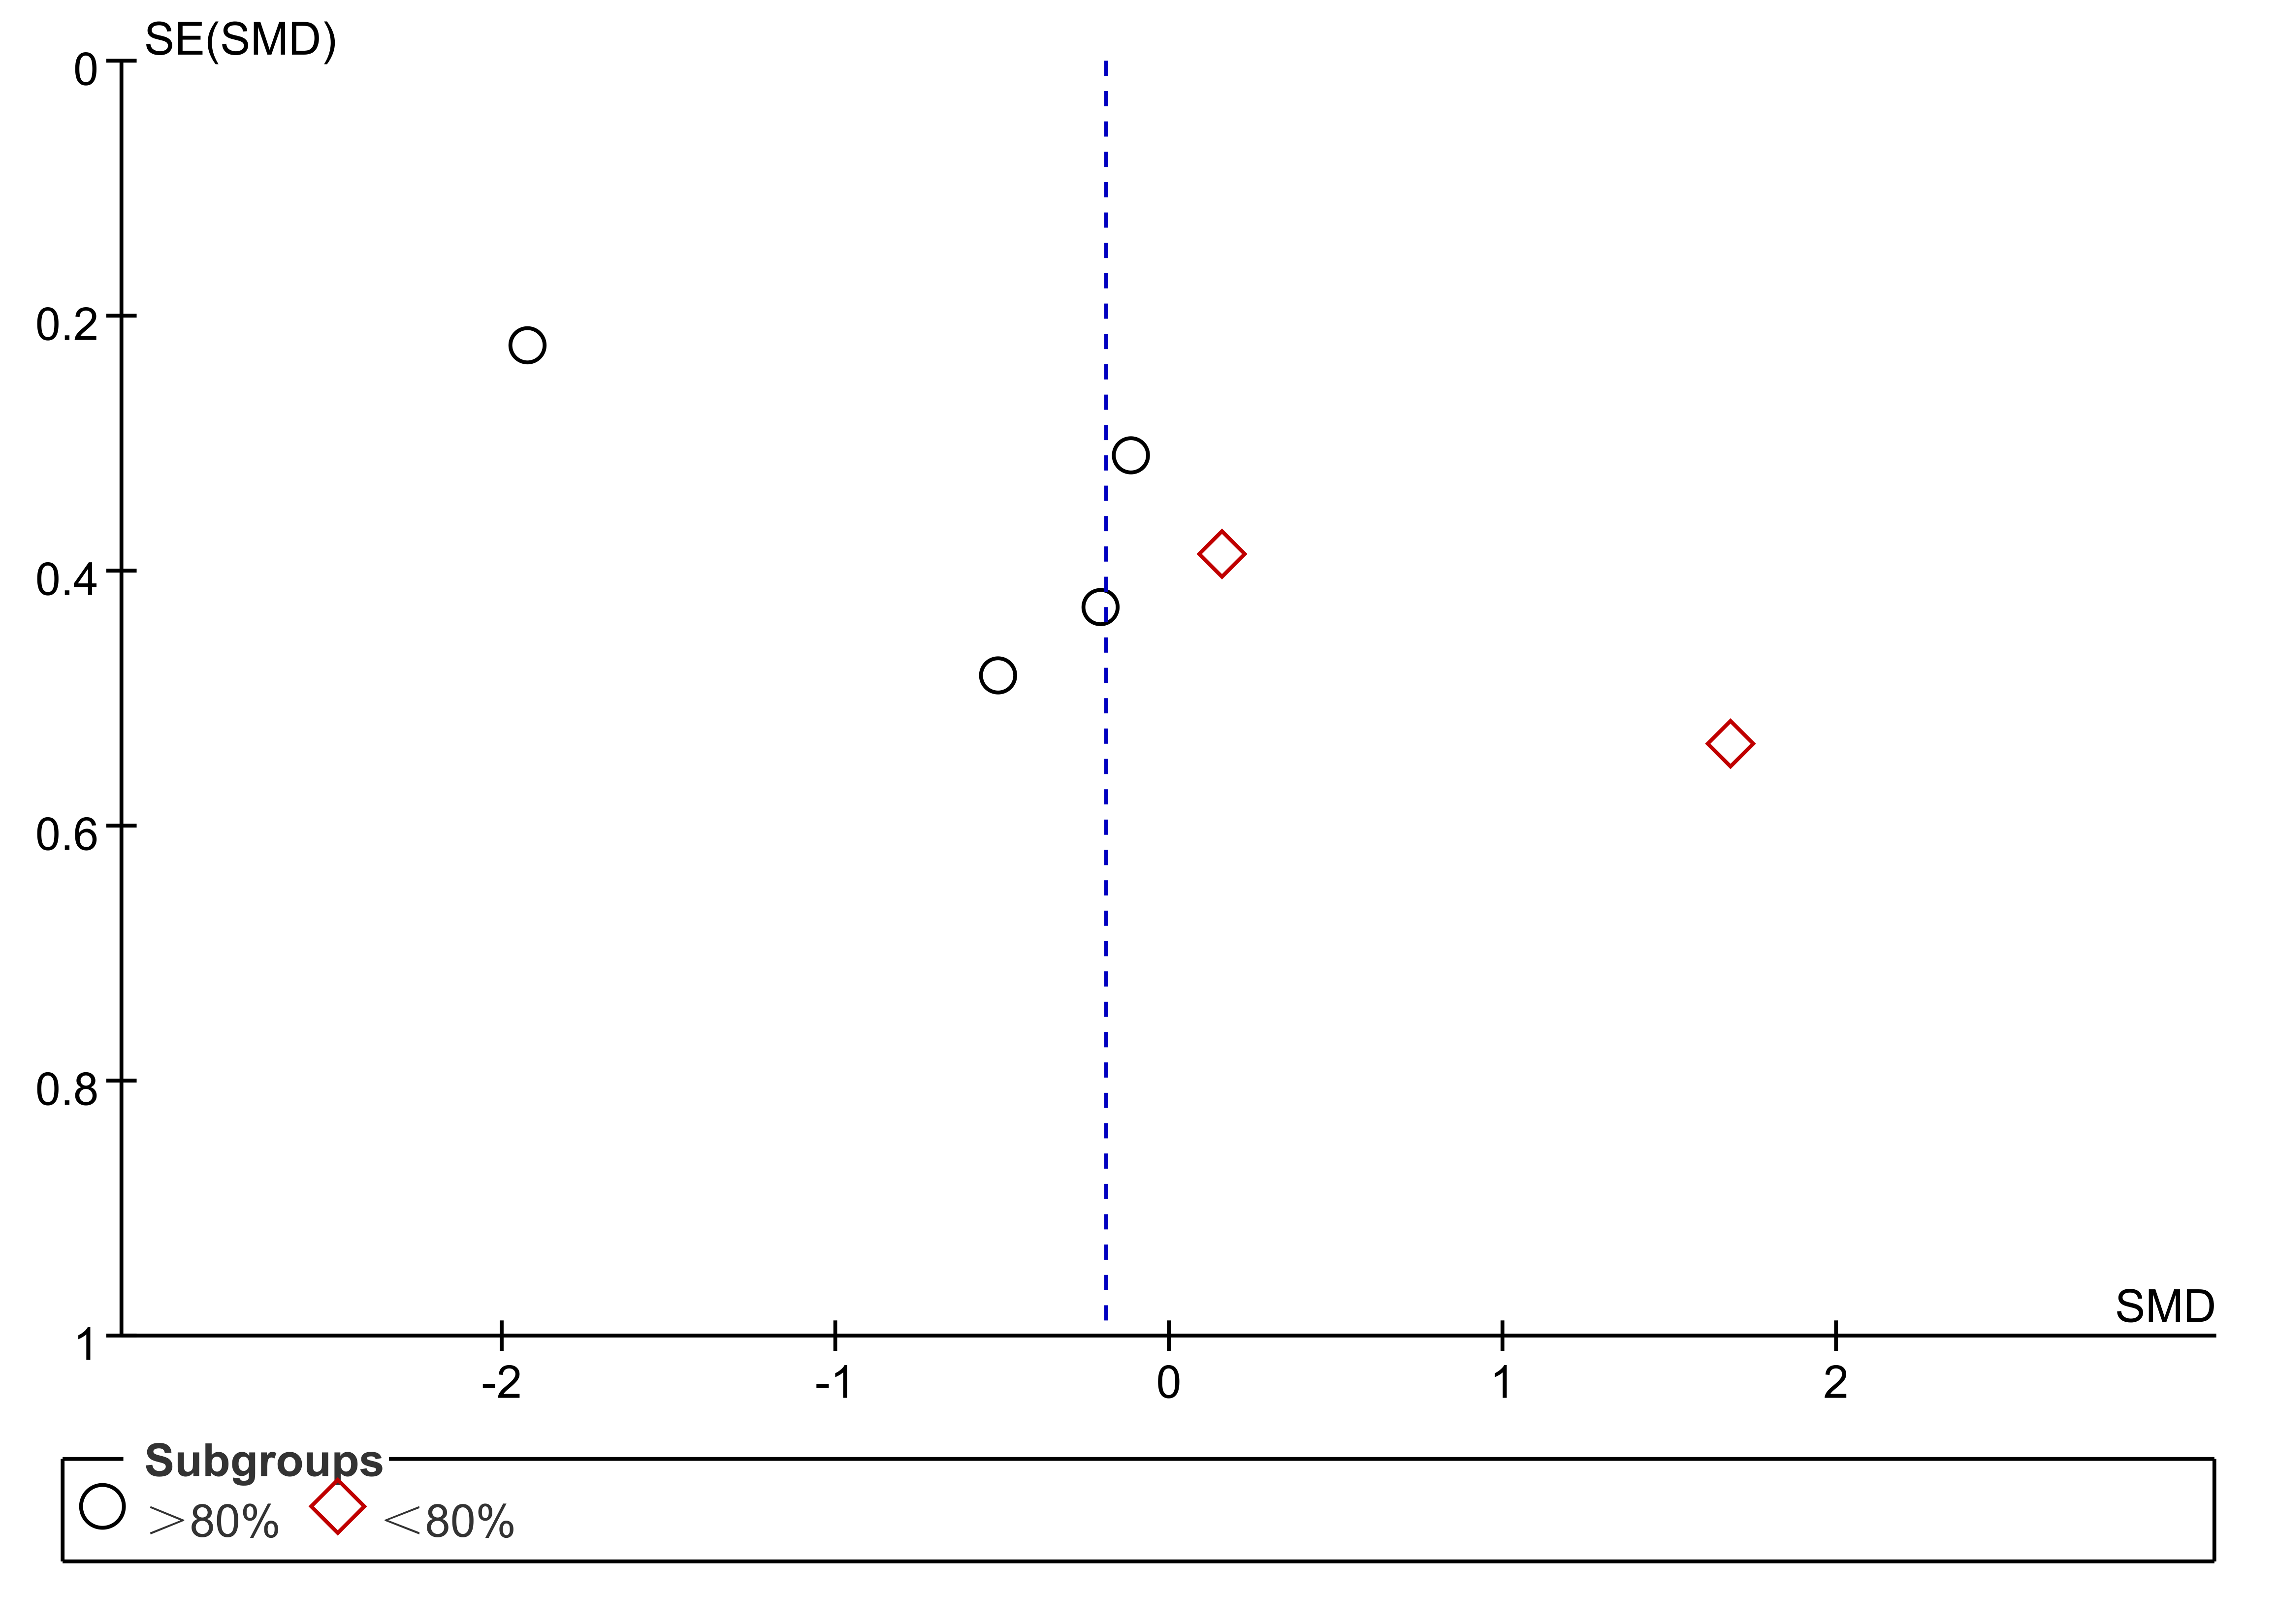


**Note:** Symmetric funnel plots showed no publication bias. >80% means studies with High adherence to ACSM recommendations . <80% means studies with low or uncertain adherence to ACSM recommendations. SE, standard error; SMD, standardized mean difference.

**Supplementary Figure S15** Sensitivity analyses of TC


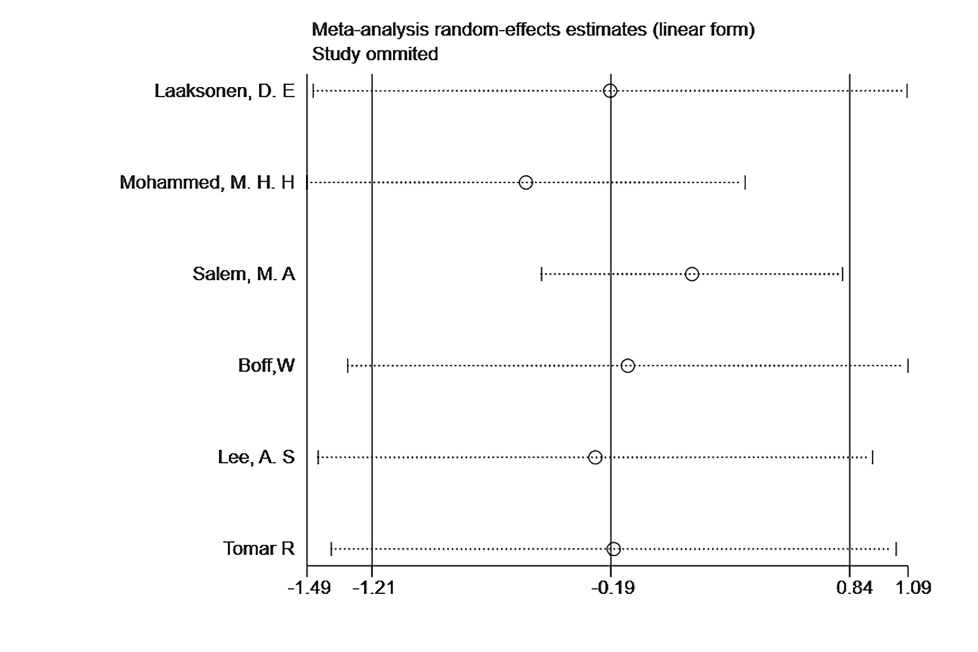


**Note:** The literature was eliminated one by one and the results showed that none of the studies had a greater impact on the overall.

**Supplementary Figure S16** Forest plot of High-density lipoprotein (HDL)


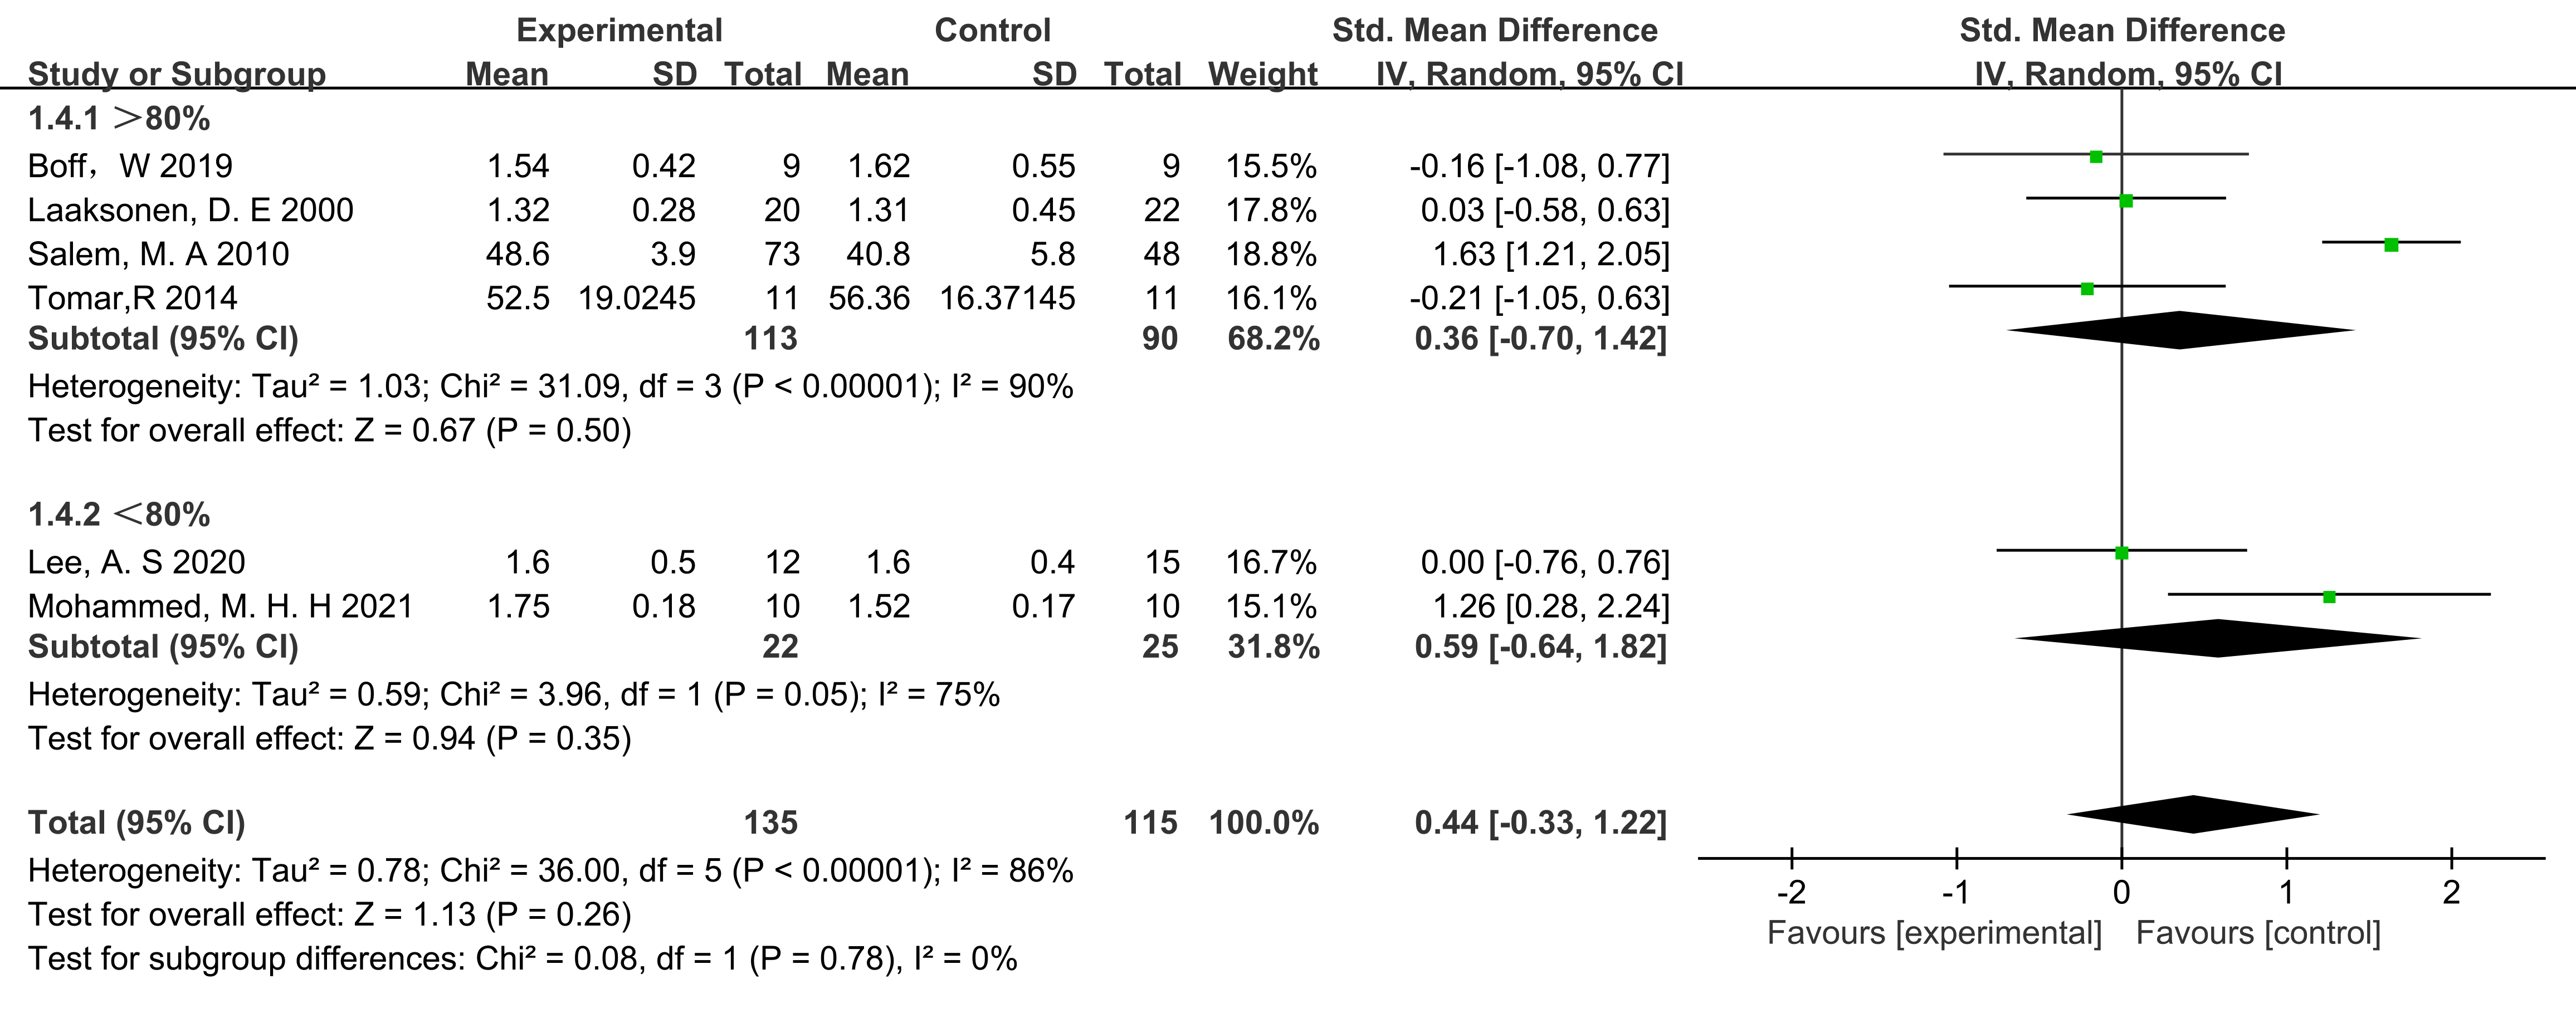


**Note:** Forest plot of High-density lipoprotein (HDL): High adherence to ACSM recommendations (>80%) vs. low or uncertain adherence to ACSM recommendations (<80%). Due to high heterogeneity (I2 = 86%), a random effect model was used. Data are presented as standardized mean difference because the units are inconsistent between indicators.

Overal result: A total of 250 participants were included (115 in the control group and 135 in the experimental group). Exercise had no significant improvement on HDL in patients with T1DM (SMD: 0.44 [95%Cl: -0.33, 1.22], I2 = 86%, p = 0.26).

SUBGROUP ANALYSIS: Neither the subgroup with high adherence to ACSM (SMD: 0.36 [95%Cl: -0.70, 1.42], I2= 90%, p = 0.50) nor the subgroup with low adherence (SMD: 0.59 [95%Cl: -0.64, 1.82], I2 = 75%, p = 0.35) had a significant effect on HDL.

**Supplementary Figure S17** Funnel plot of HDL


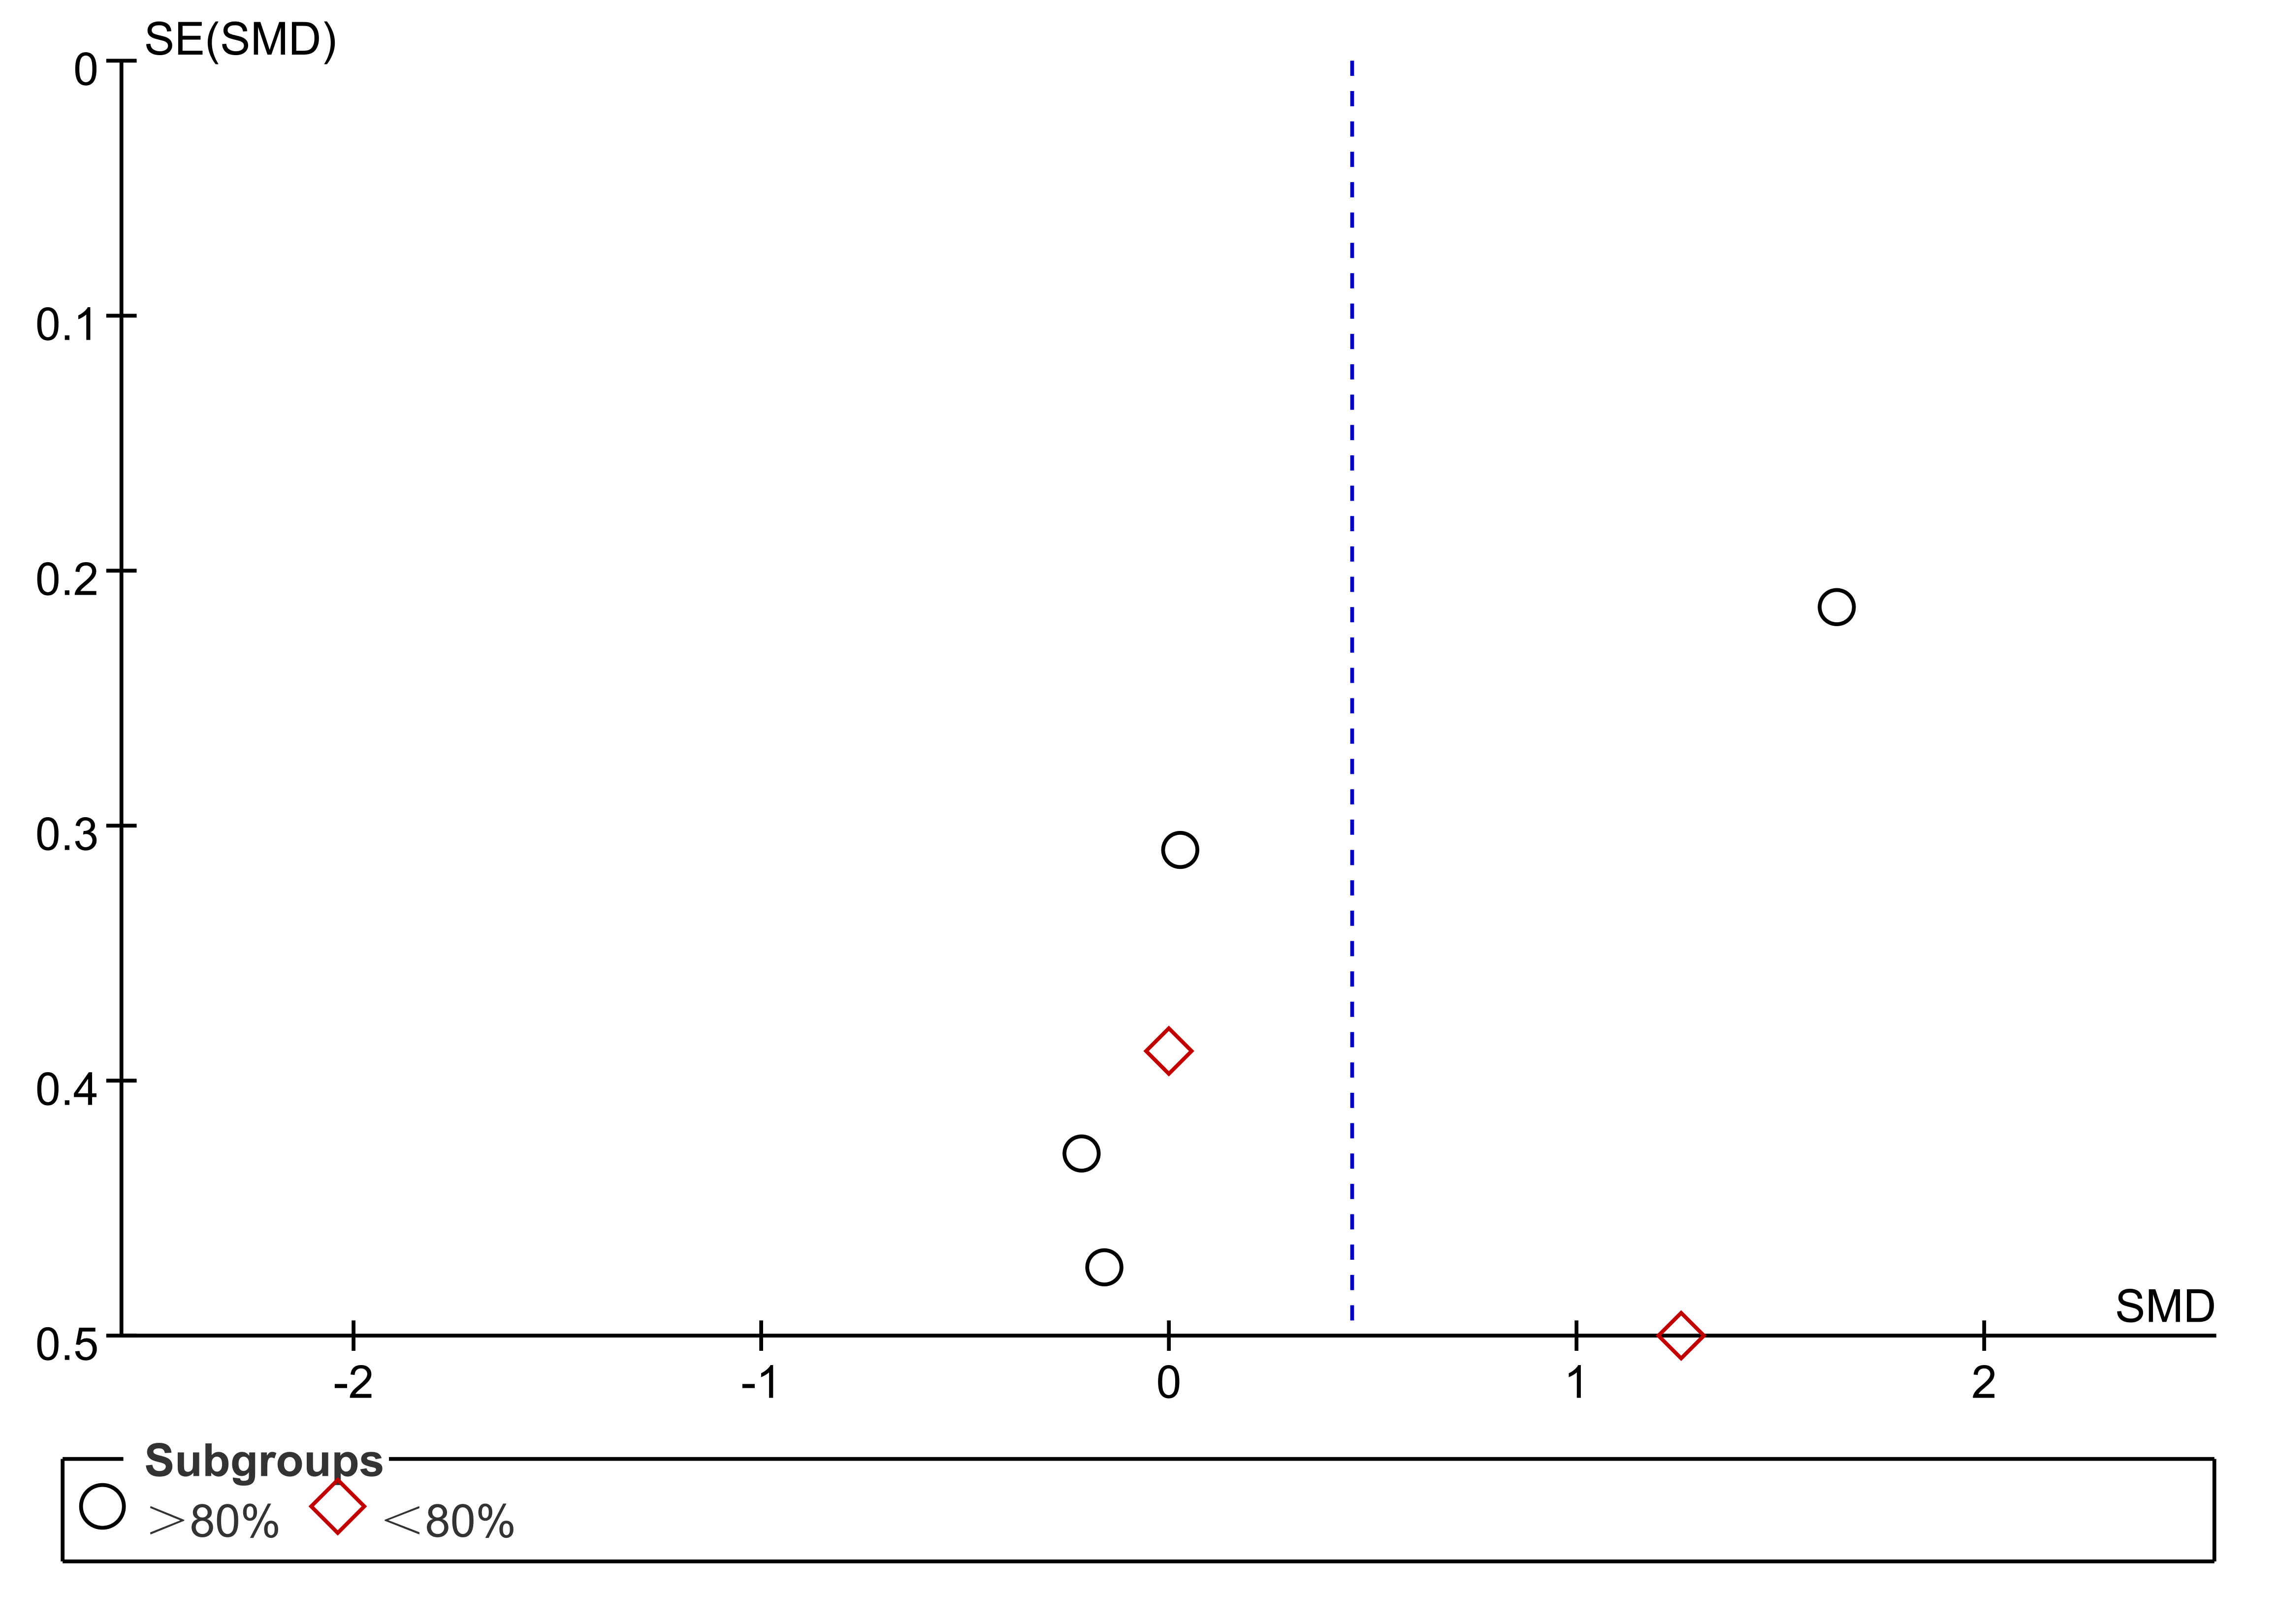


**Note:** Symmetric funnel plots showed no publication bias. ＞80% means studies with High adherence to ACSM recommendations . ＜80% means studies with low or uncertain adherence to ACSM recommendations. SE, standard error; SMD, standardized mean difference.

**Supplementary Figure S18** Sensitivity analyses of HDL


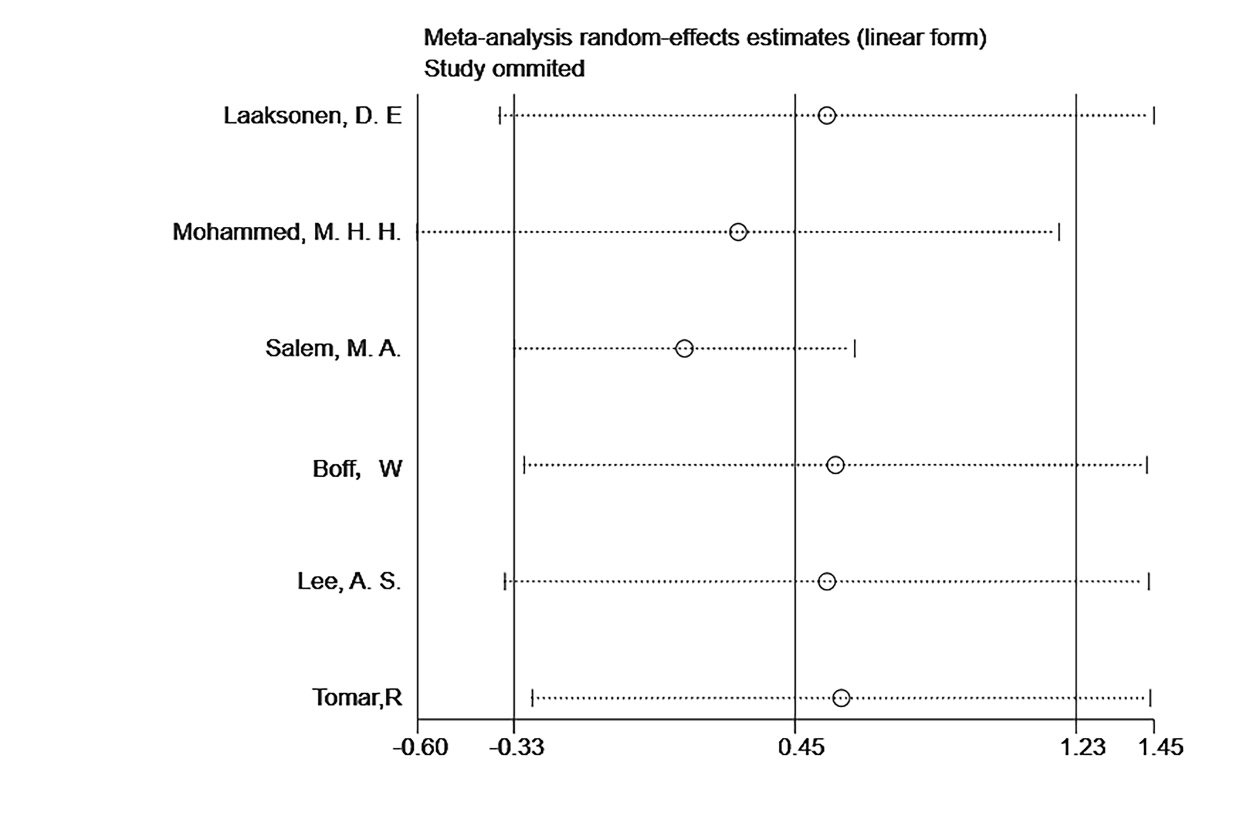


**Note:** The literature was eliminated one by one and the results showed that none of the studies had a greater impact on the overall.

**Supplementary Figure S19** Forest plot of Low-density lipoprotein (LDL)


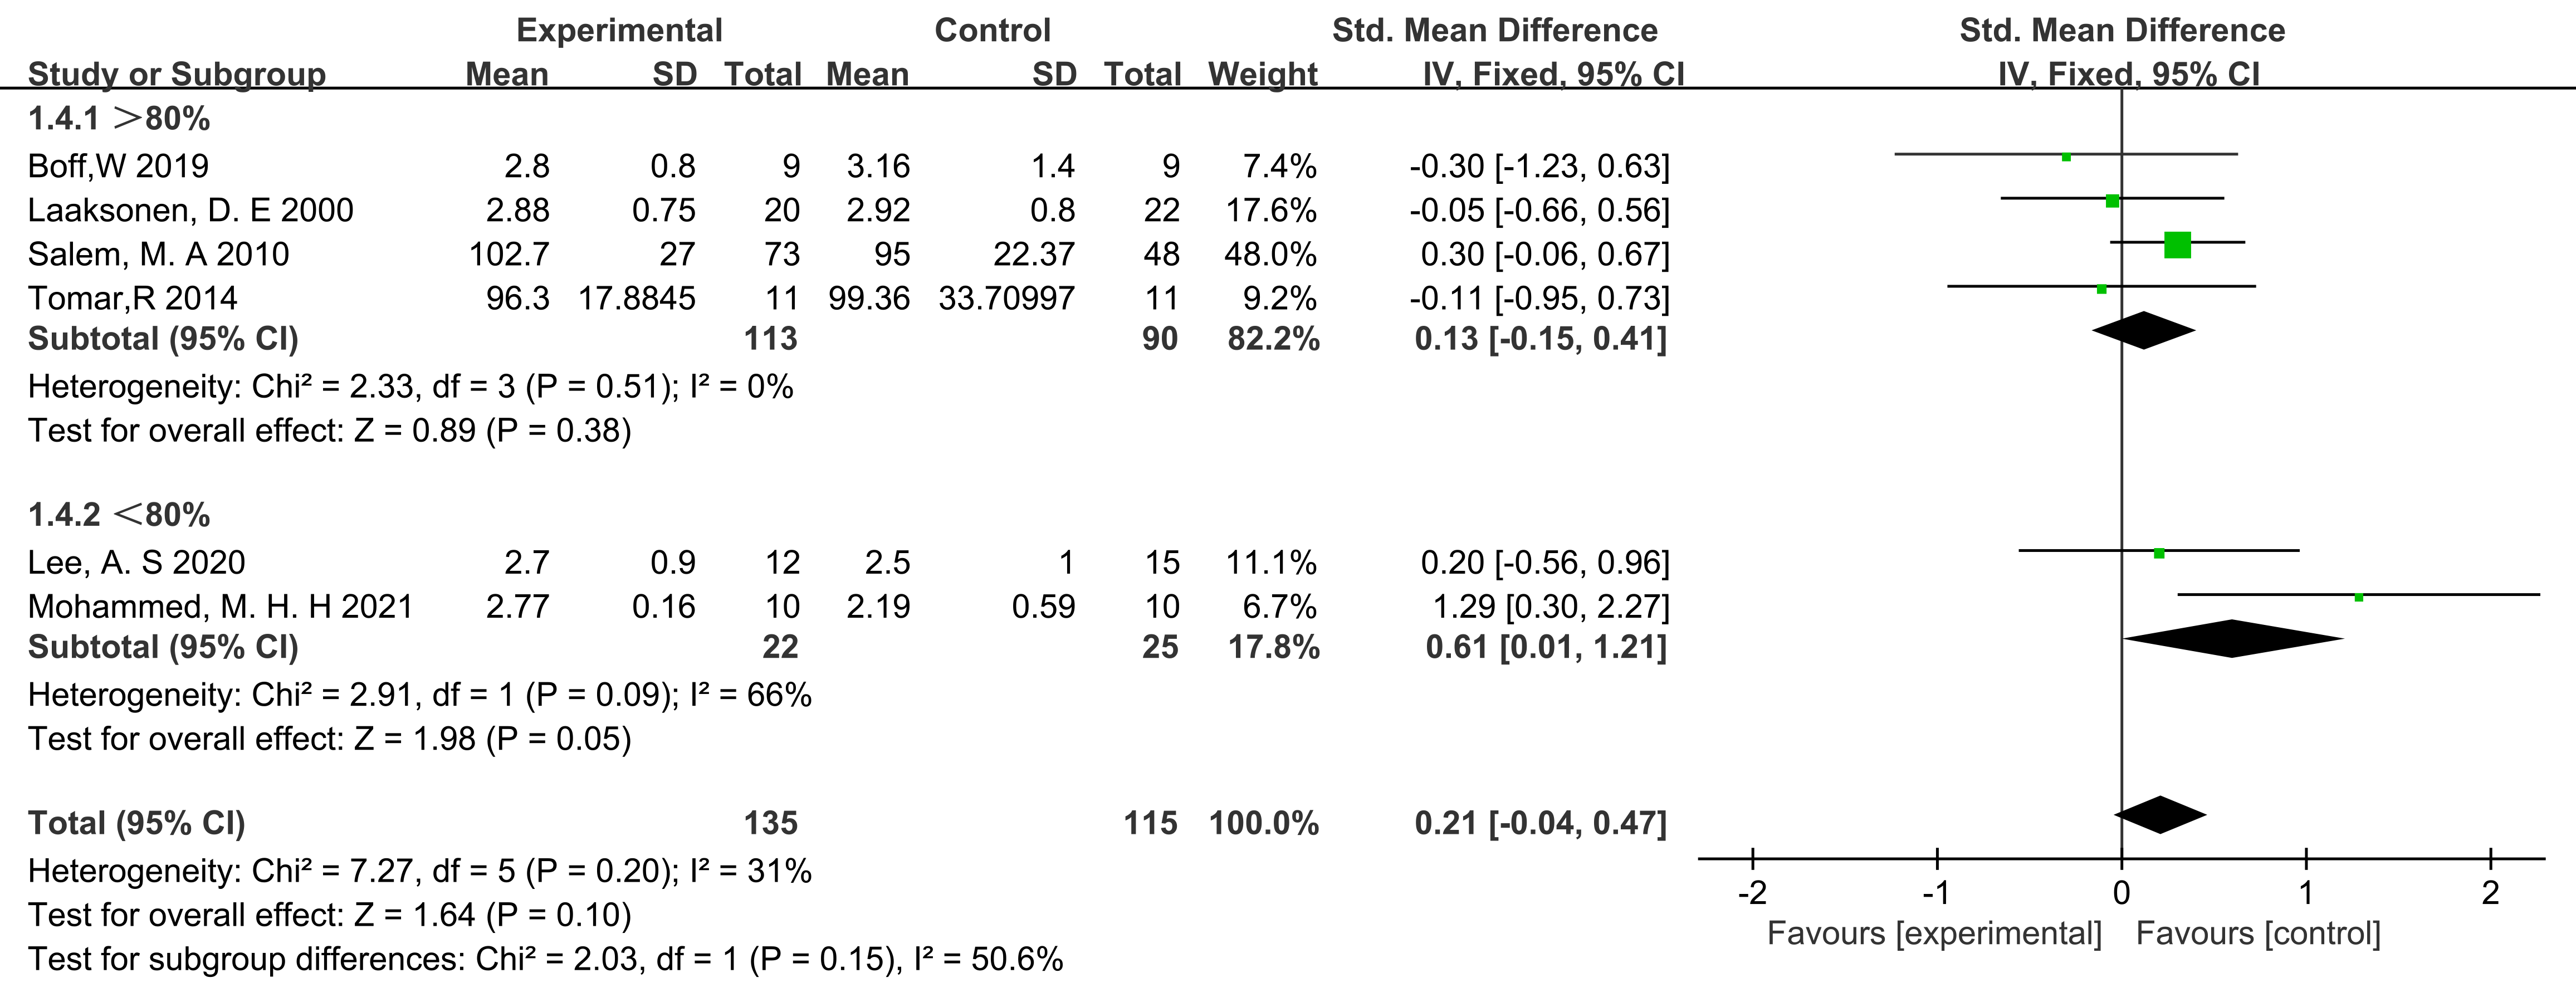


**Note:** Forest plot of Low-density lipoprotein (LDL): High adherence to ACSM recommendations (>80%) vs. low or uncertain adherence to ACSM recommendations (<80%). Due to low heterogeneity (I2 = 31%), a fixed effect model was used. Data are presented as standardized mean difference because the units are inconsistent between indicators.

Overall result: A total of 250 participants were included (115 in the control group and 135 in the experimental group). Exercise had no significant improvement on LDL in patients with T1DM (SMD: 0.21 [95%Cl: -0.04, 0.47], I2 = 31%, p = 0.10).

SUBGROUP ANALYSIS: Neither the subgroup with high adherence to ACSM (SMD: 0.13 [-0.15, 0.41], I2= 0%, P = 0.38) nor the subgroup with low adherence (SMD: 0.61 [95%Cl: 0.01,1.21], I2 = 66%, p=0.05) had a significant effect on LDL.

**Supplementary Figure S20** Funnel plot of LDL


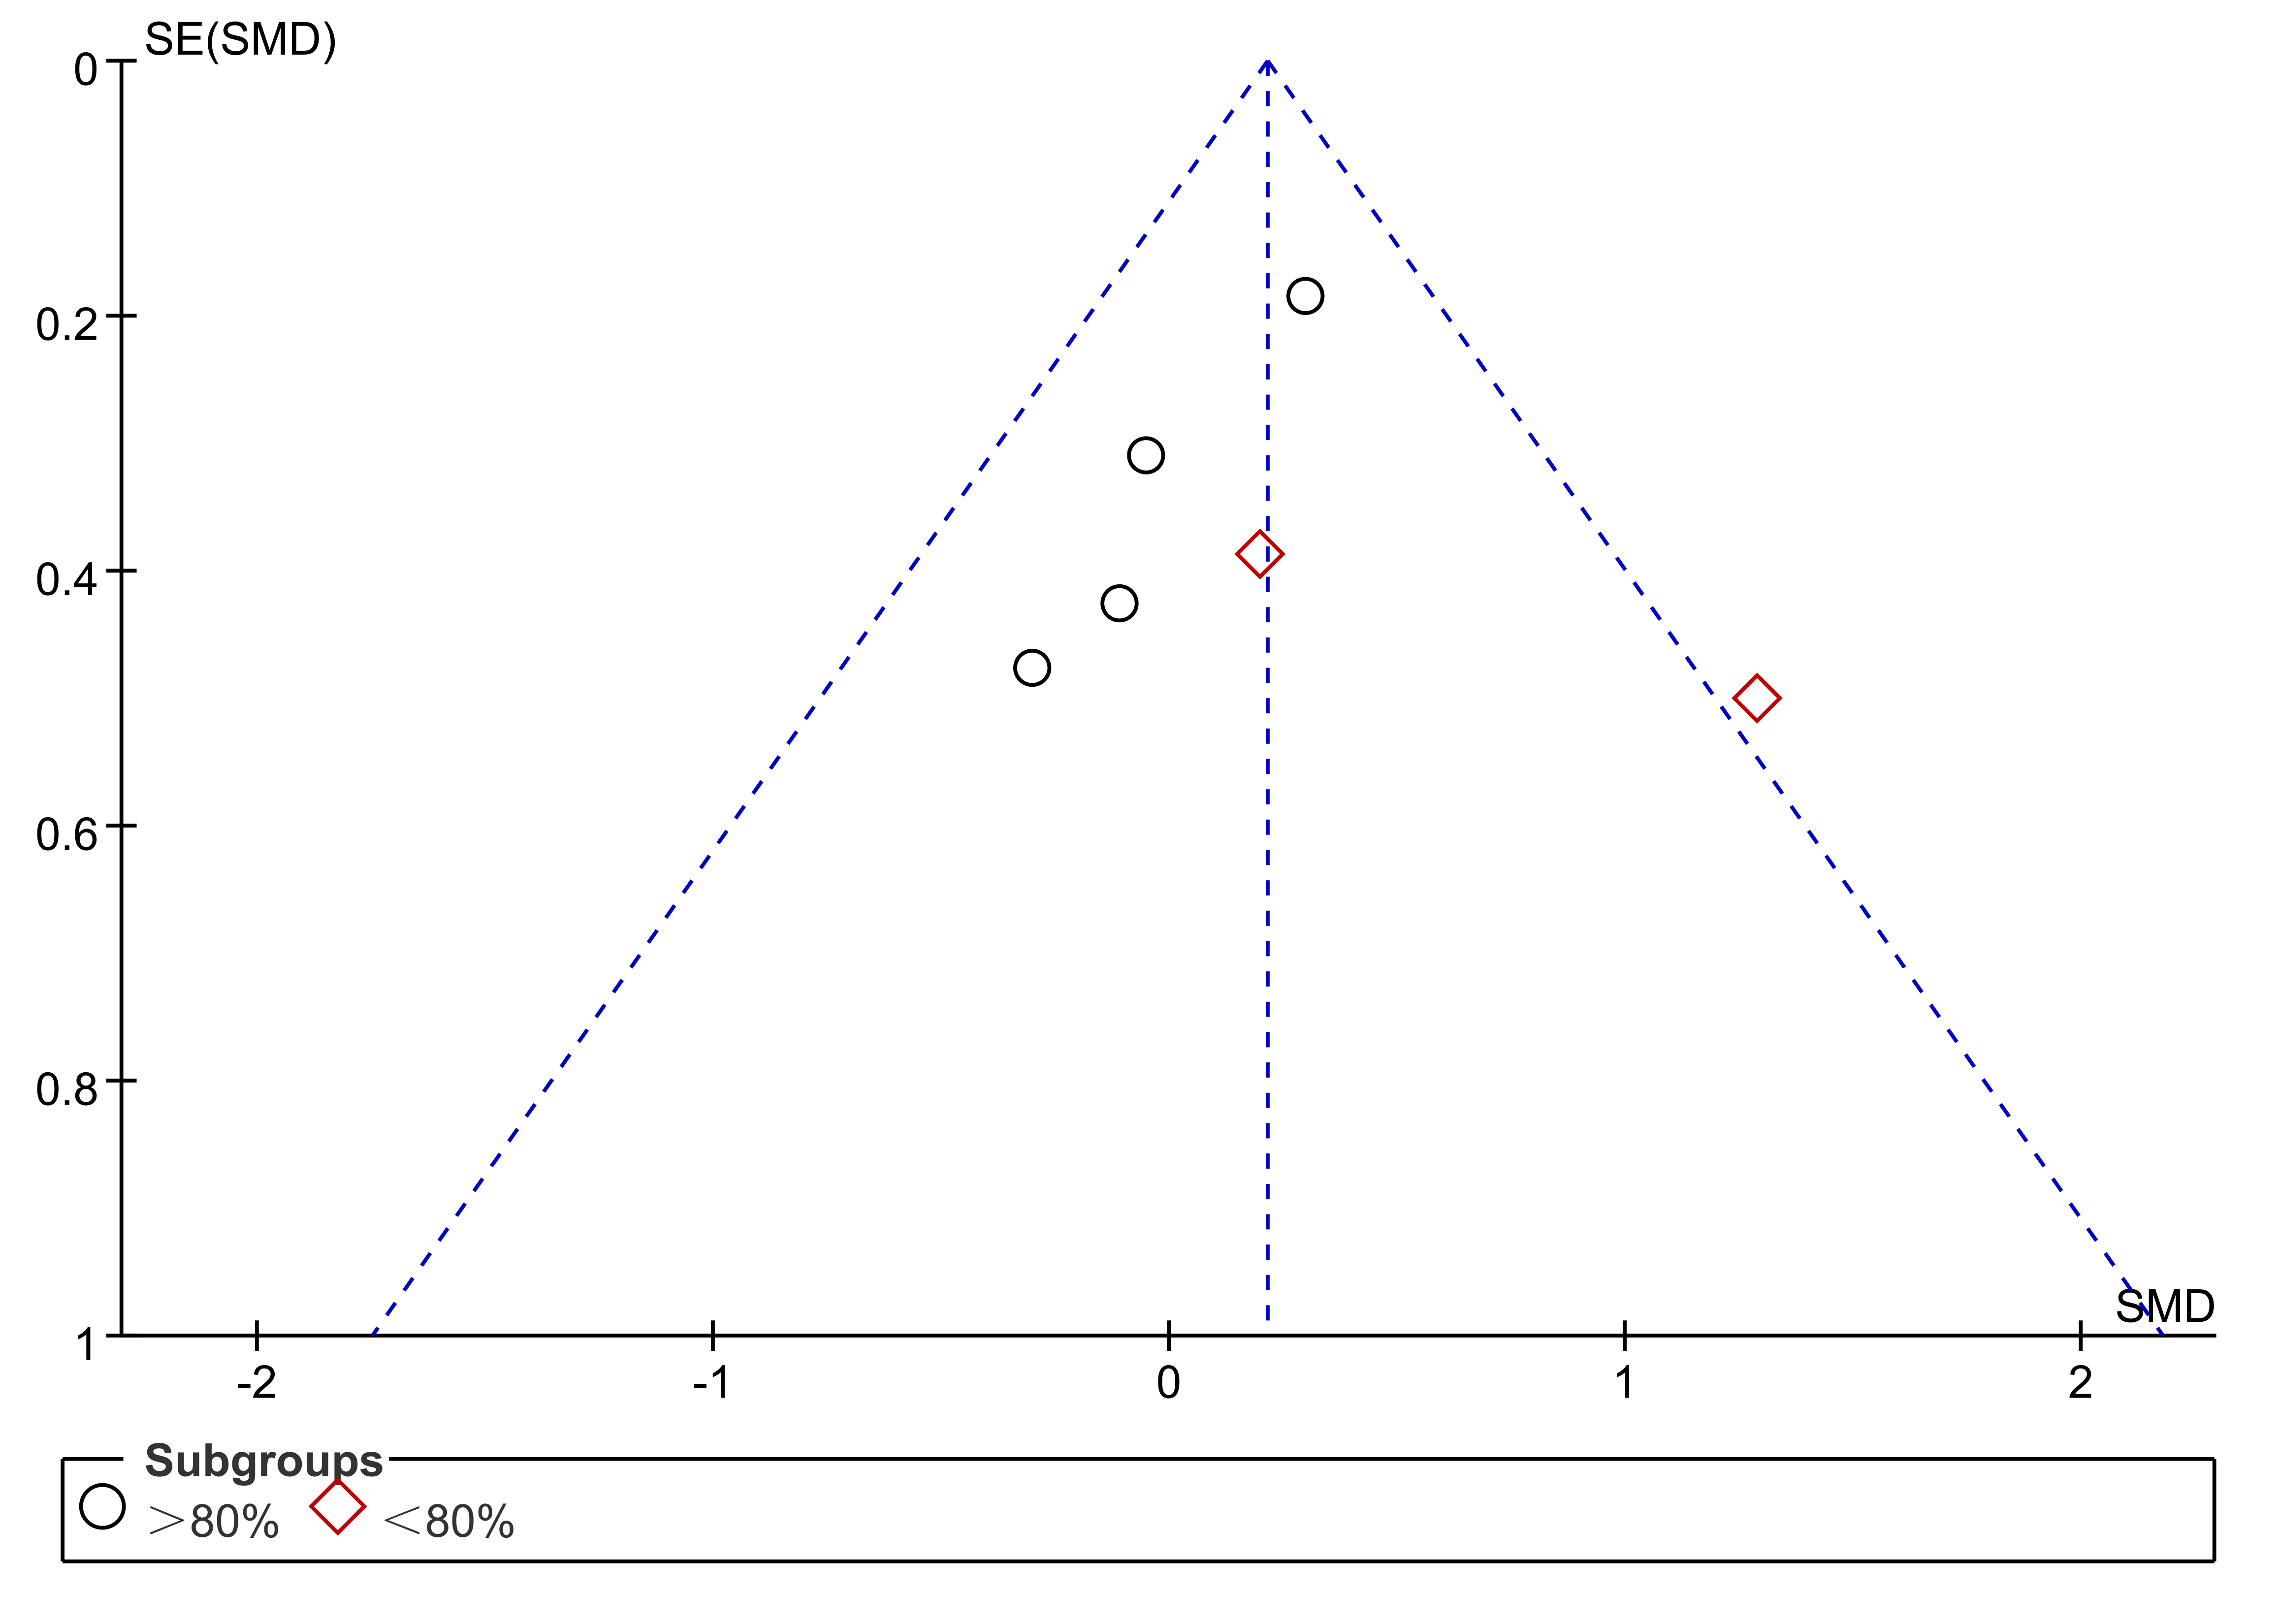


**Note:** Symmetric funnel plots showed no publication bias. >80% means studies with High adherence to ACSM recommendations . <80% means studies with low or uncertain adherence to ACSM recommendations. SE, standard error; SMD, standardized mean difference.

**Supplementary Figure S21** Sensitivity analyses of LDL


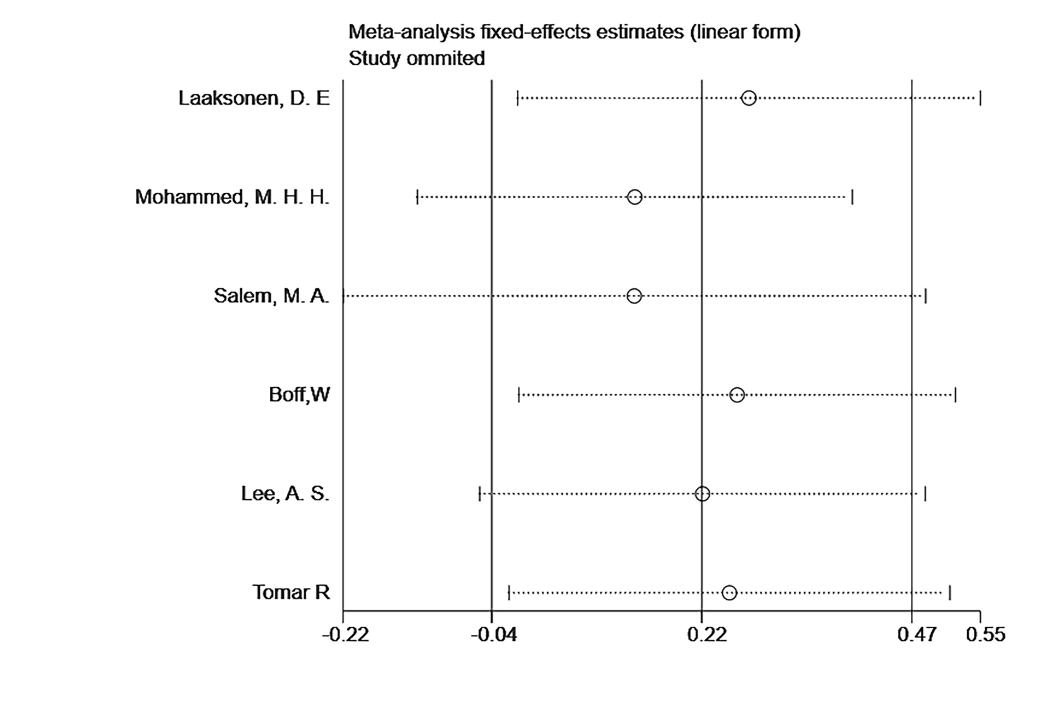


**Note:** The literature was eliminated one by one and the results showed that none of the studies had a greater impact on the overall.

**Supplementary Figure S22** Forest plot of Weight


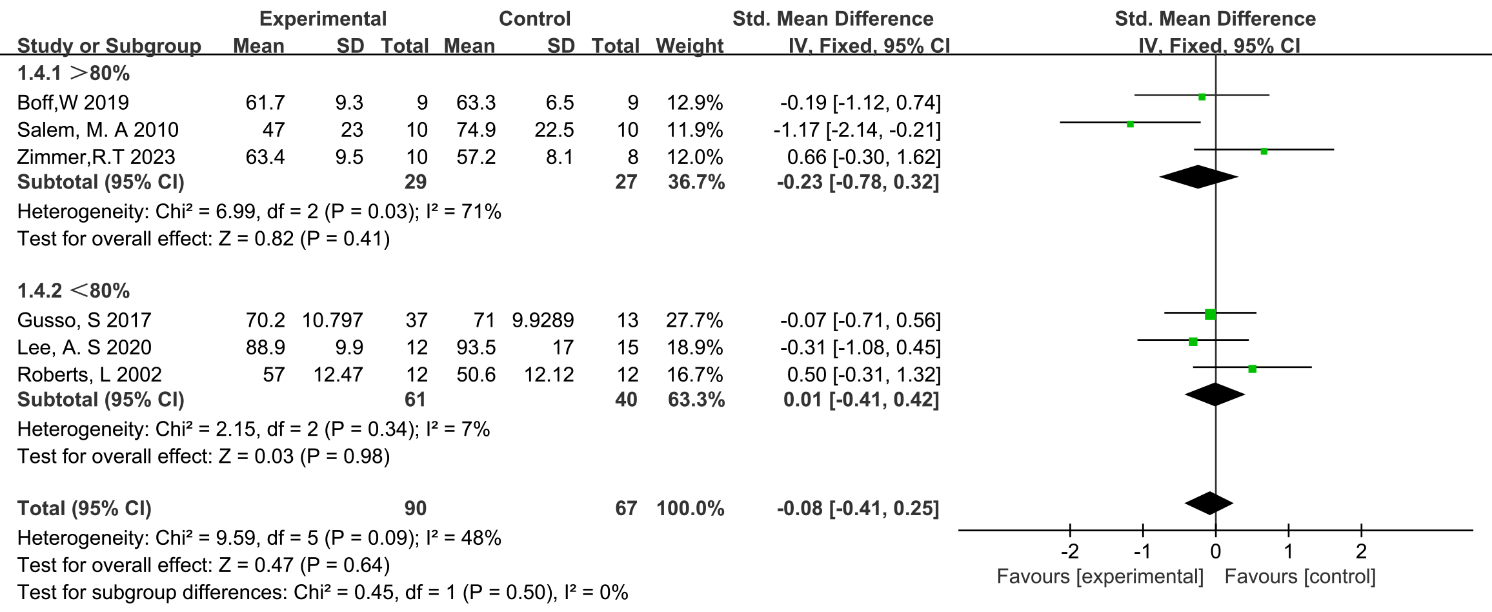


**Note:** Forest plot of Weight: High adherence to ACSM recommendations (>80%) vs. low or uncertain adherence to ACSM recommendations (<80%). Due to the low heterogeneity (I2 = 48%), a fixed effect model was used. Data are presented as standardized mean difference because the units are inconsistent between indicators.

Overal result: A total of 157 participants were included (67 in the control group and 90 in the experimental group). Exercise had no significant improvement on Weight in patients with T1DM (SMD: -0.08 [95%Cl: -0.41, 0.25], I2 = 48%, p = 0.64).

SUBGROUP ANALYSIS: Neither the subgroup with high adherence to ACSM (SMD: -0.23 [-0.78, 0.32] , I2 = 71%, p = 0.41) nor the subgroup with low adherence (SMD: 0.01 [95%Cl: -0.41, 0.42], I2 = 7%, p = 0.98) had a significant effect on Weight.

**Supplementary Figure S23** Funnel plot of Weight


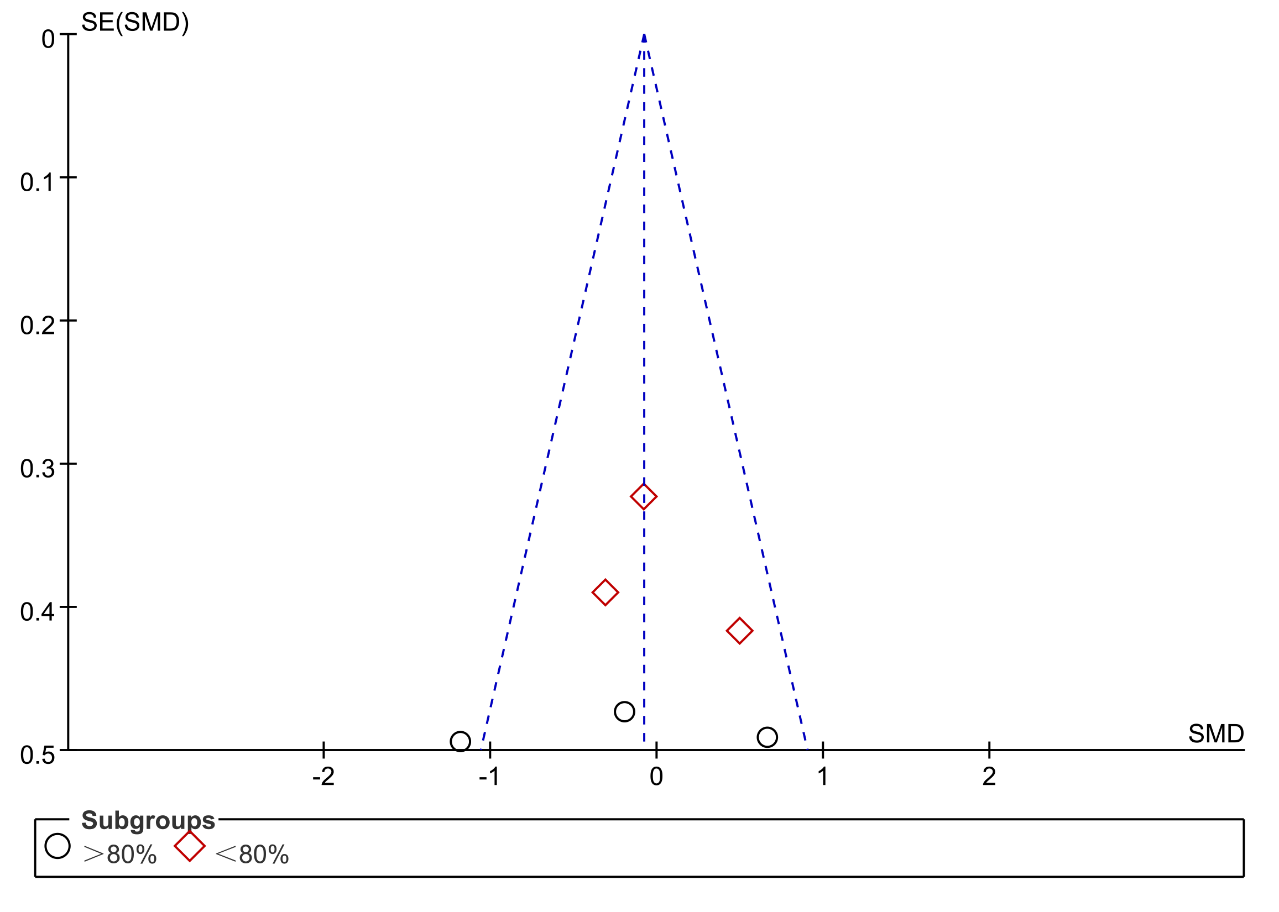


**Note:** Symmetric funnel plots showed no publication bias. >80% means studies with High adherence to ACSM recommendations . <80% means studies with low or uncertain adherence to ACSM recommendations. SE, standard error; SMD, standardized mean difference.

**Supplementary Figure S24** Sensitivity analyses of Weight


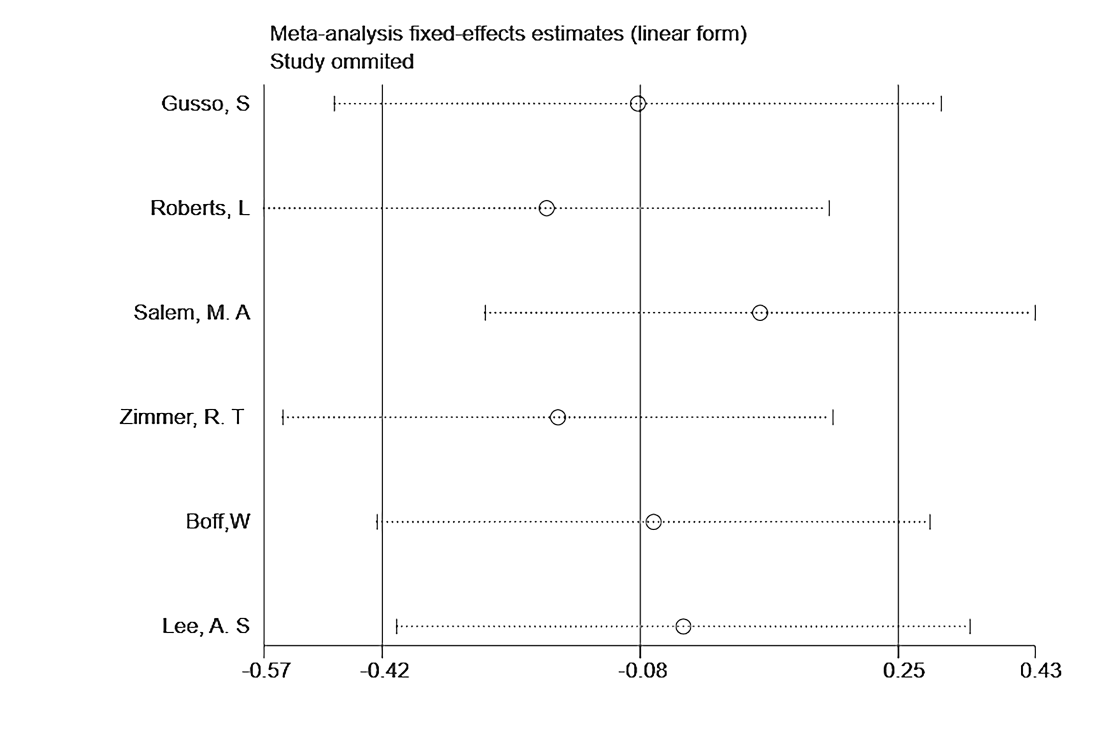


**Note:** The literature was eliminated one by one and the results showed that none of the studies had a greater impact on the overall.

**Supplementary Figure S25** Forest plot of Fat Free Mass (FFM)


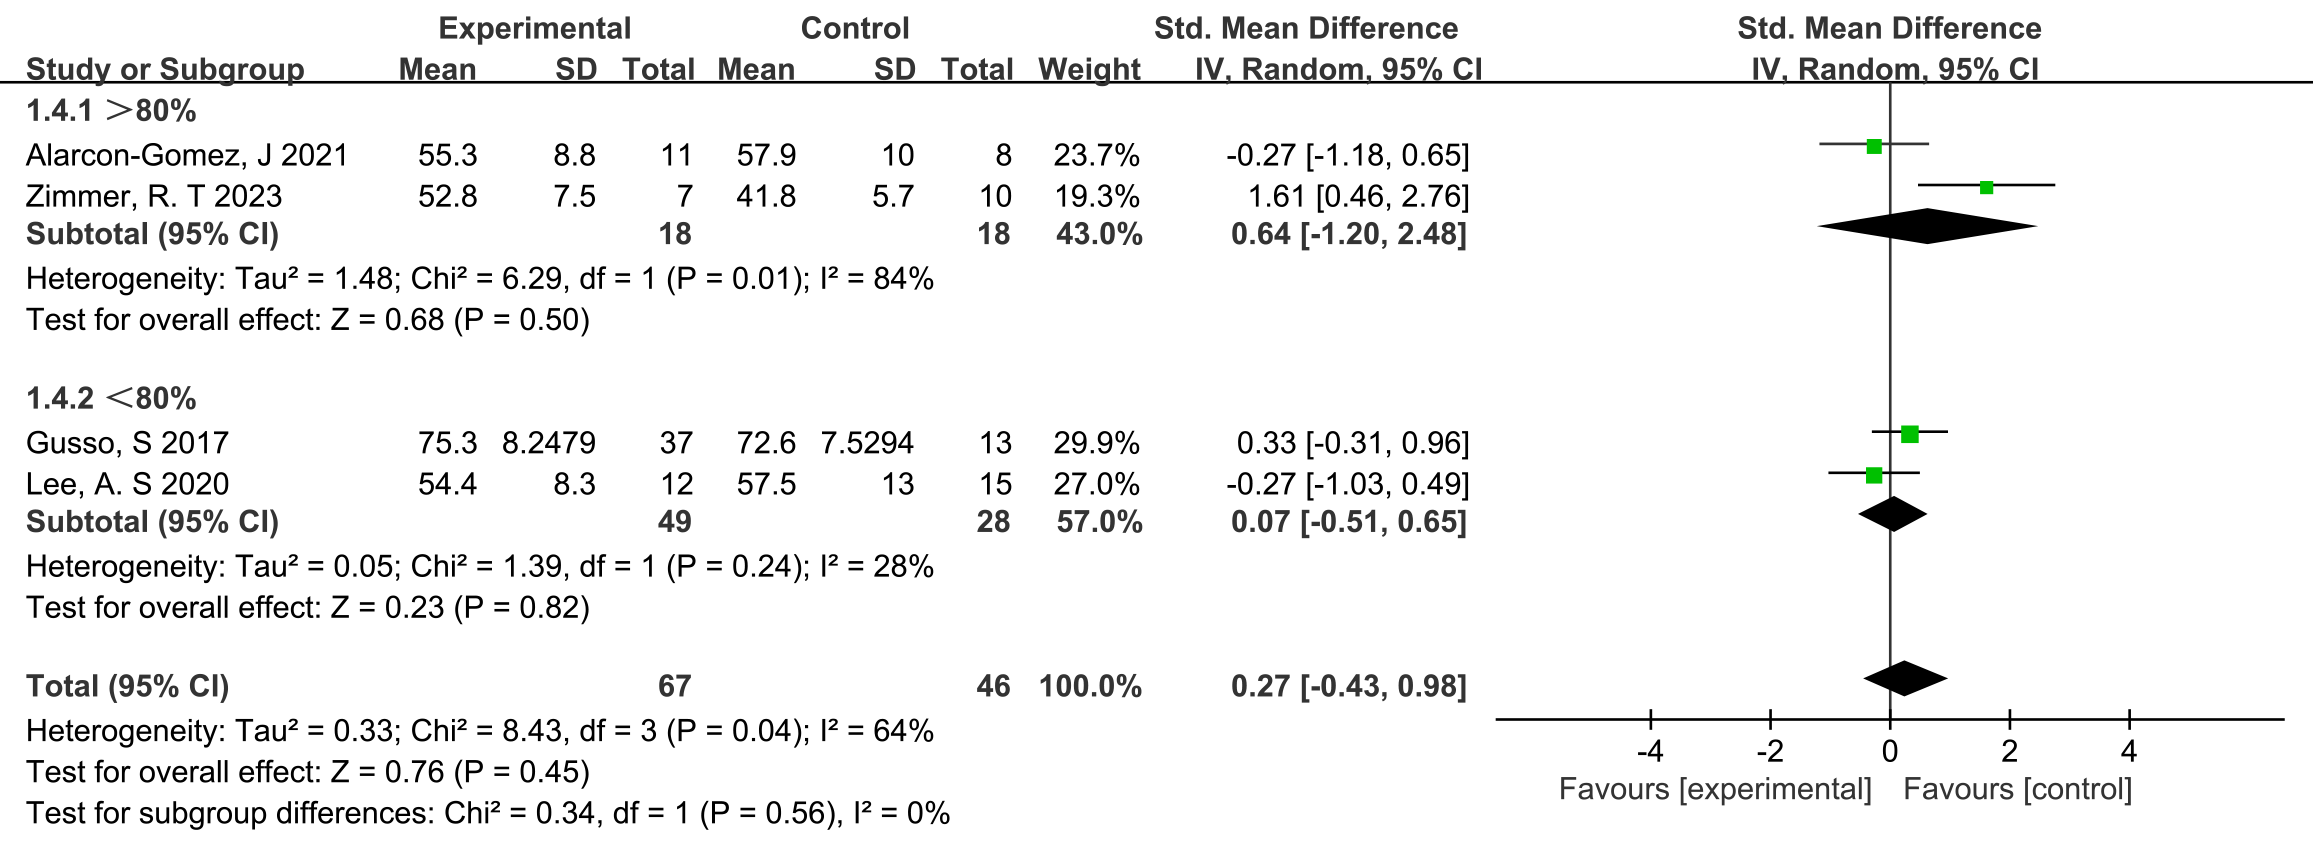


**Note:** Forest plot of Fat Free Mass (FFM): High adherence to ACSM recommendations (>80%) vs. low or uncertain adherence to ACSM recommendations (<80%). Due to the high heterogeneity (I2 = 64%), a random effect model was used. Data are presented as standardized mean difference because the units are inconsistent between indicators.

Overal result: A total of 113 participants were included (46 in the control group and 67 in the experimental group). Exercise had no significant improvement on FFM in patients with T1DM (SMD: 0.27 [95%Cl: -0.43, 0.98], I2 = 64%, p = 0.45).

SUBGROUP ANALYSIS: Neither the subgroup with high adherence to ACSM (SMD: 0.64 [95%Cl: -1.20, 2.48], I2 = 84%, p = 0.50) nor the subgroup with low adherence (SMD: 0.07 [95%Cl: -0.51, 0.65], I2 = 28%, p=0.82) had a significant effect on FFM.

**Supplementary Figure S26** Funnel plot of FFM


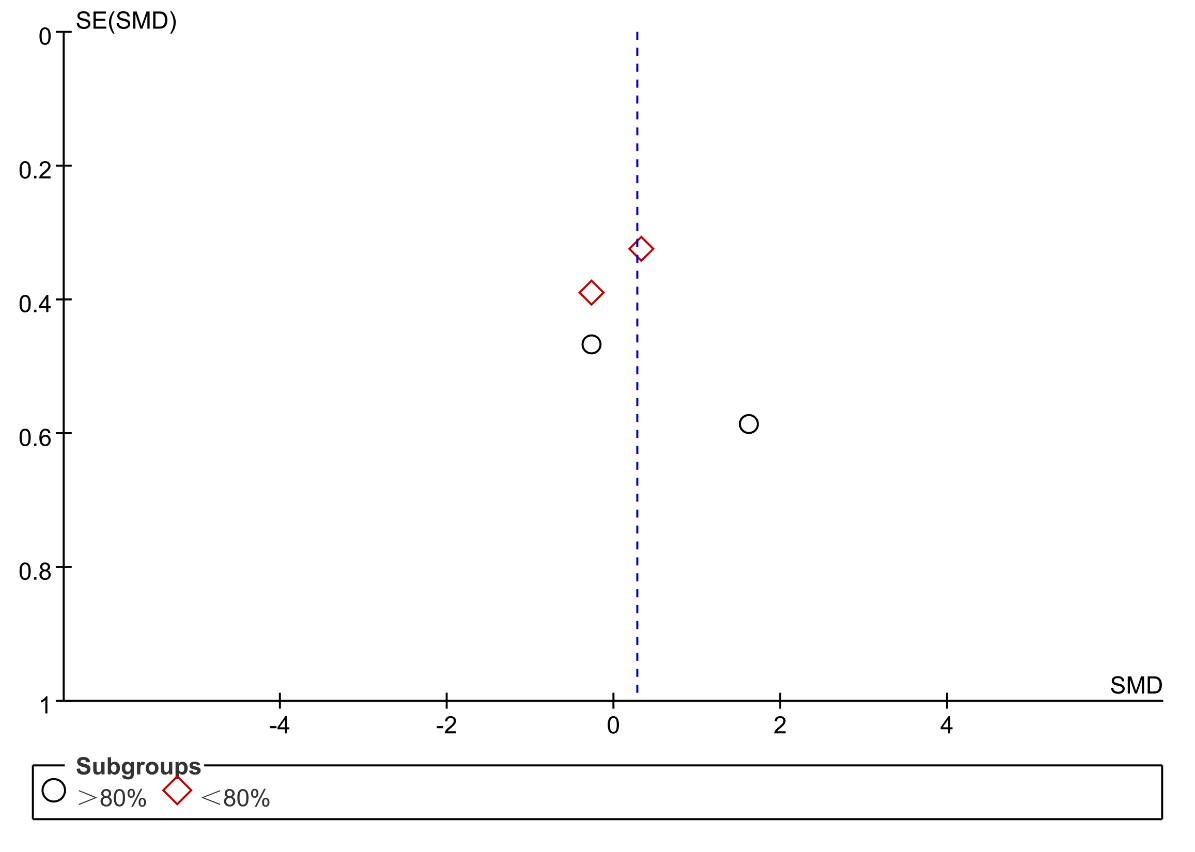


**Note:** Symmetric funnel plots showed no publication bias. >80% means studies with High adherence to ACSM recommendations . <80% means studies with low or uncertain adherence to ACSM recommendations. SE, standard error; SMD, standardized mean difference.

**Supplementary Figure S27** Sensitivity analyses of FFM


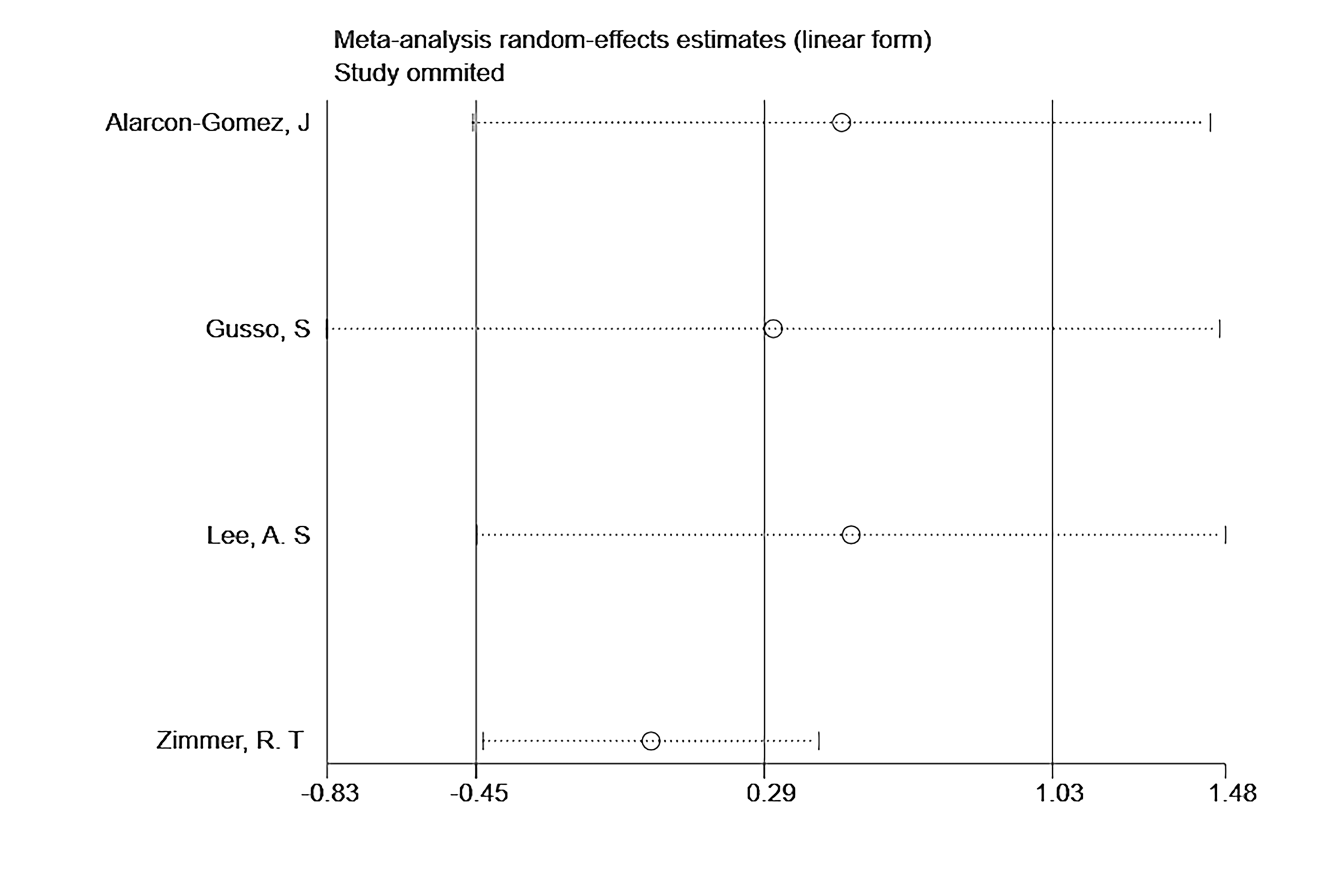


**Note:** The literature was eliminated one by one and the results showed that none of the studies had a greater impact on the overall.

**Supplementary Figure S28** Forest plot of Diastolic blood pressure (DBP)


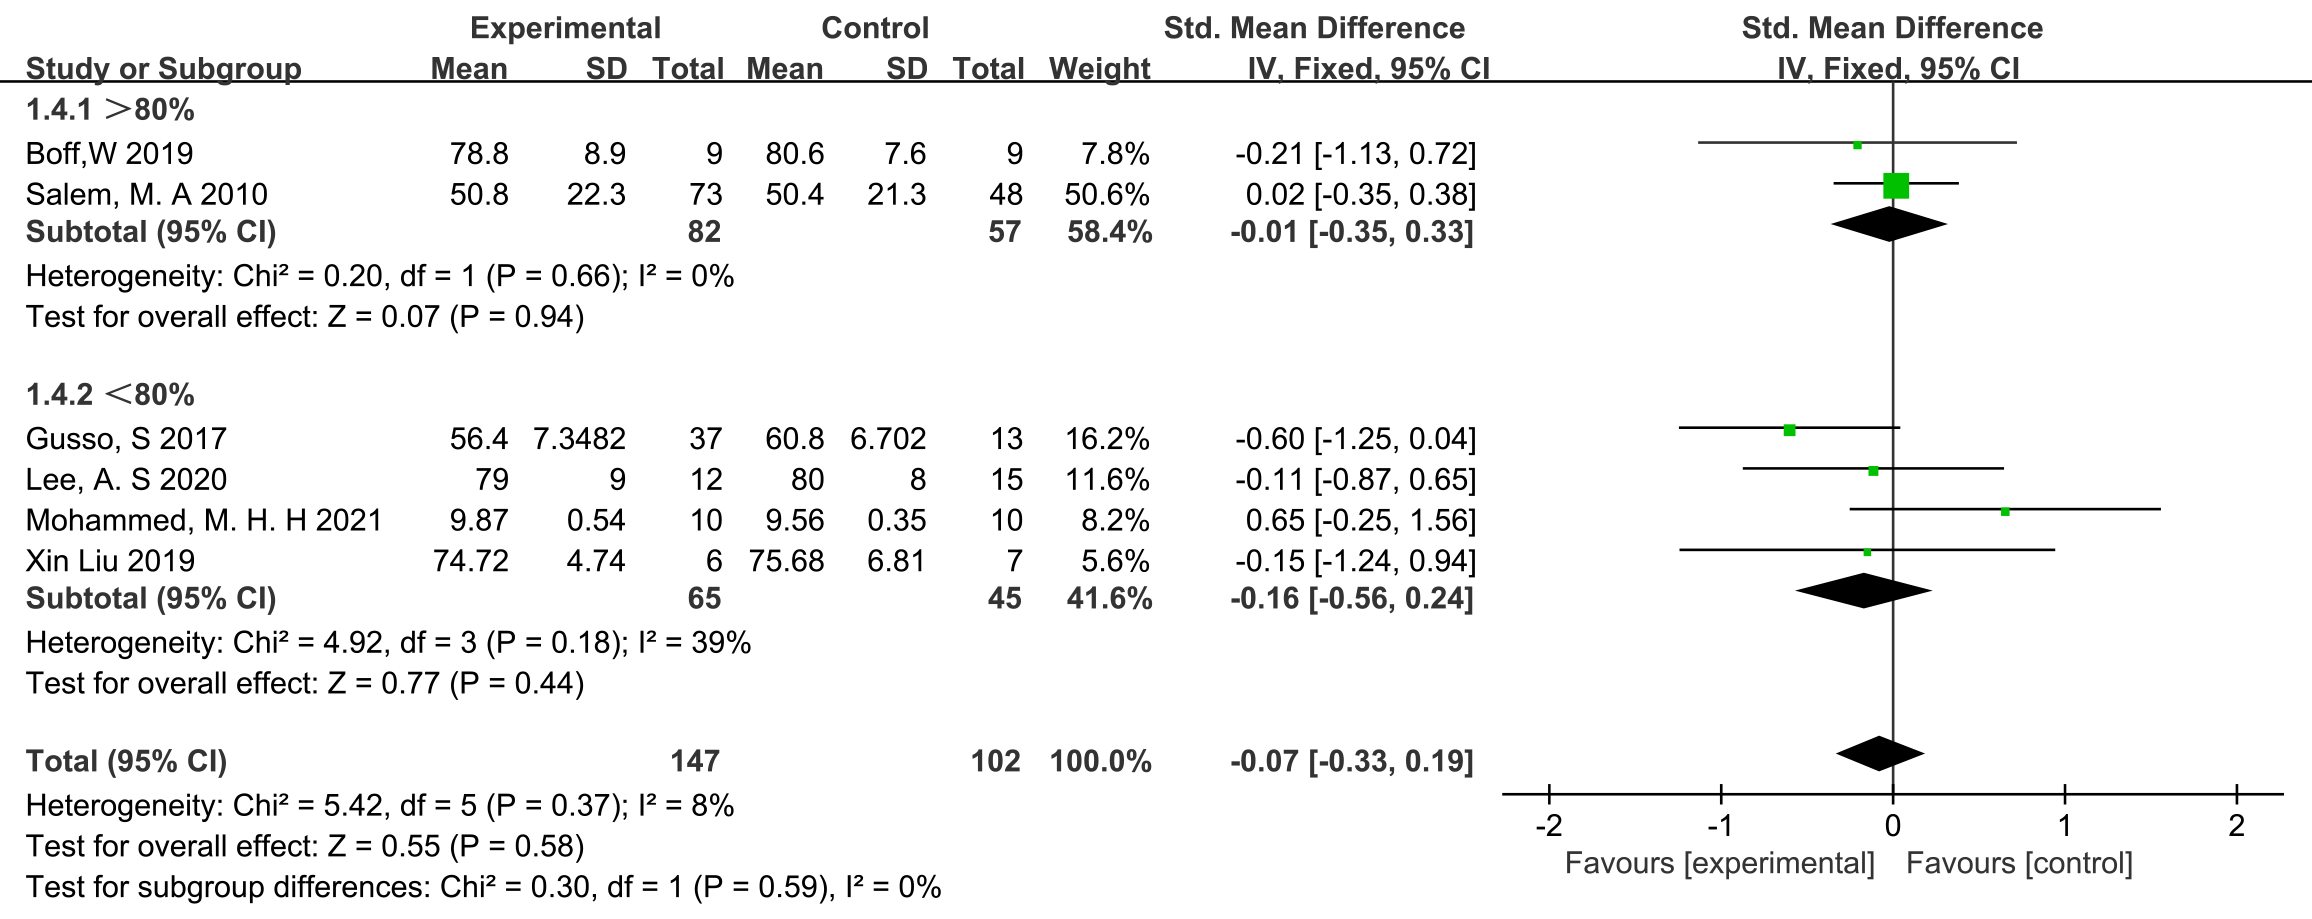


**Note:** Forest plot of Diastolic blood pressure (DBP): High adherence to ACSM recommendations (>80%) vs. low or uncertain adherence to ACSM recommendations (<80%). Due to the low heterogeneity (I2 = 8%), a fixed effect model was used. Data are presented as standardized mean difference because the units are inconsistent between indicators.

Overal result: A total of 249 participants were included (102 in the control group and 147 in the experimental group). Exercise had no significant improvement on DBP in patients with T1DM (SMD: -0.07 [95%Cl: -0.33, 0.19], I2 = 8%, p = 0.58).

SUBGROUP ANALYSIS: Neither the subgroup with high adherence to ACSM (SMD: -0.01 [95%Cl: -0.35, 0.33], I2 = 0%, p = 0.94) nor the subgroup with low adherence (SMD: -0.16 [95%Cl: -0.56, 0.24], I2 = 39%, p=0.44) had a significant effect on DBP.

**Supplementary Figure S29** Forest plot of DBP


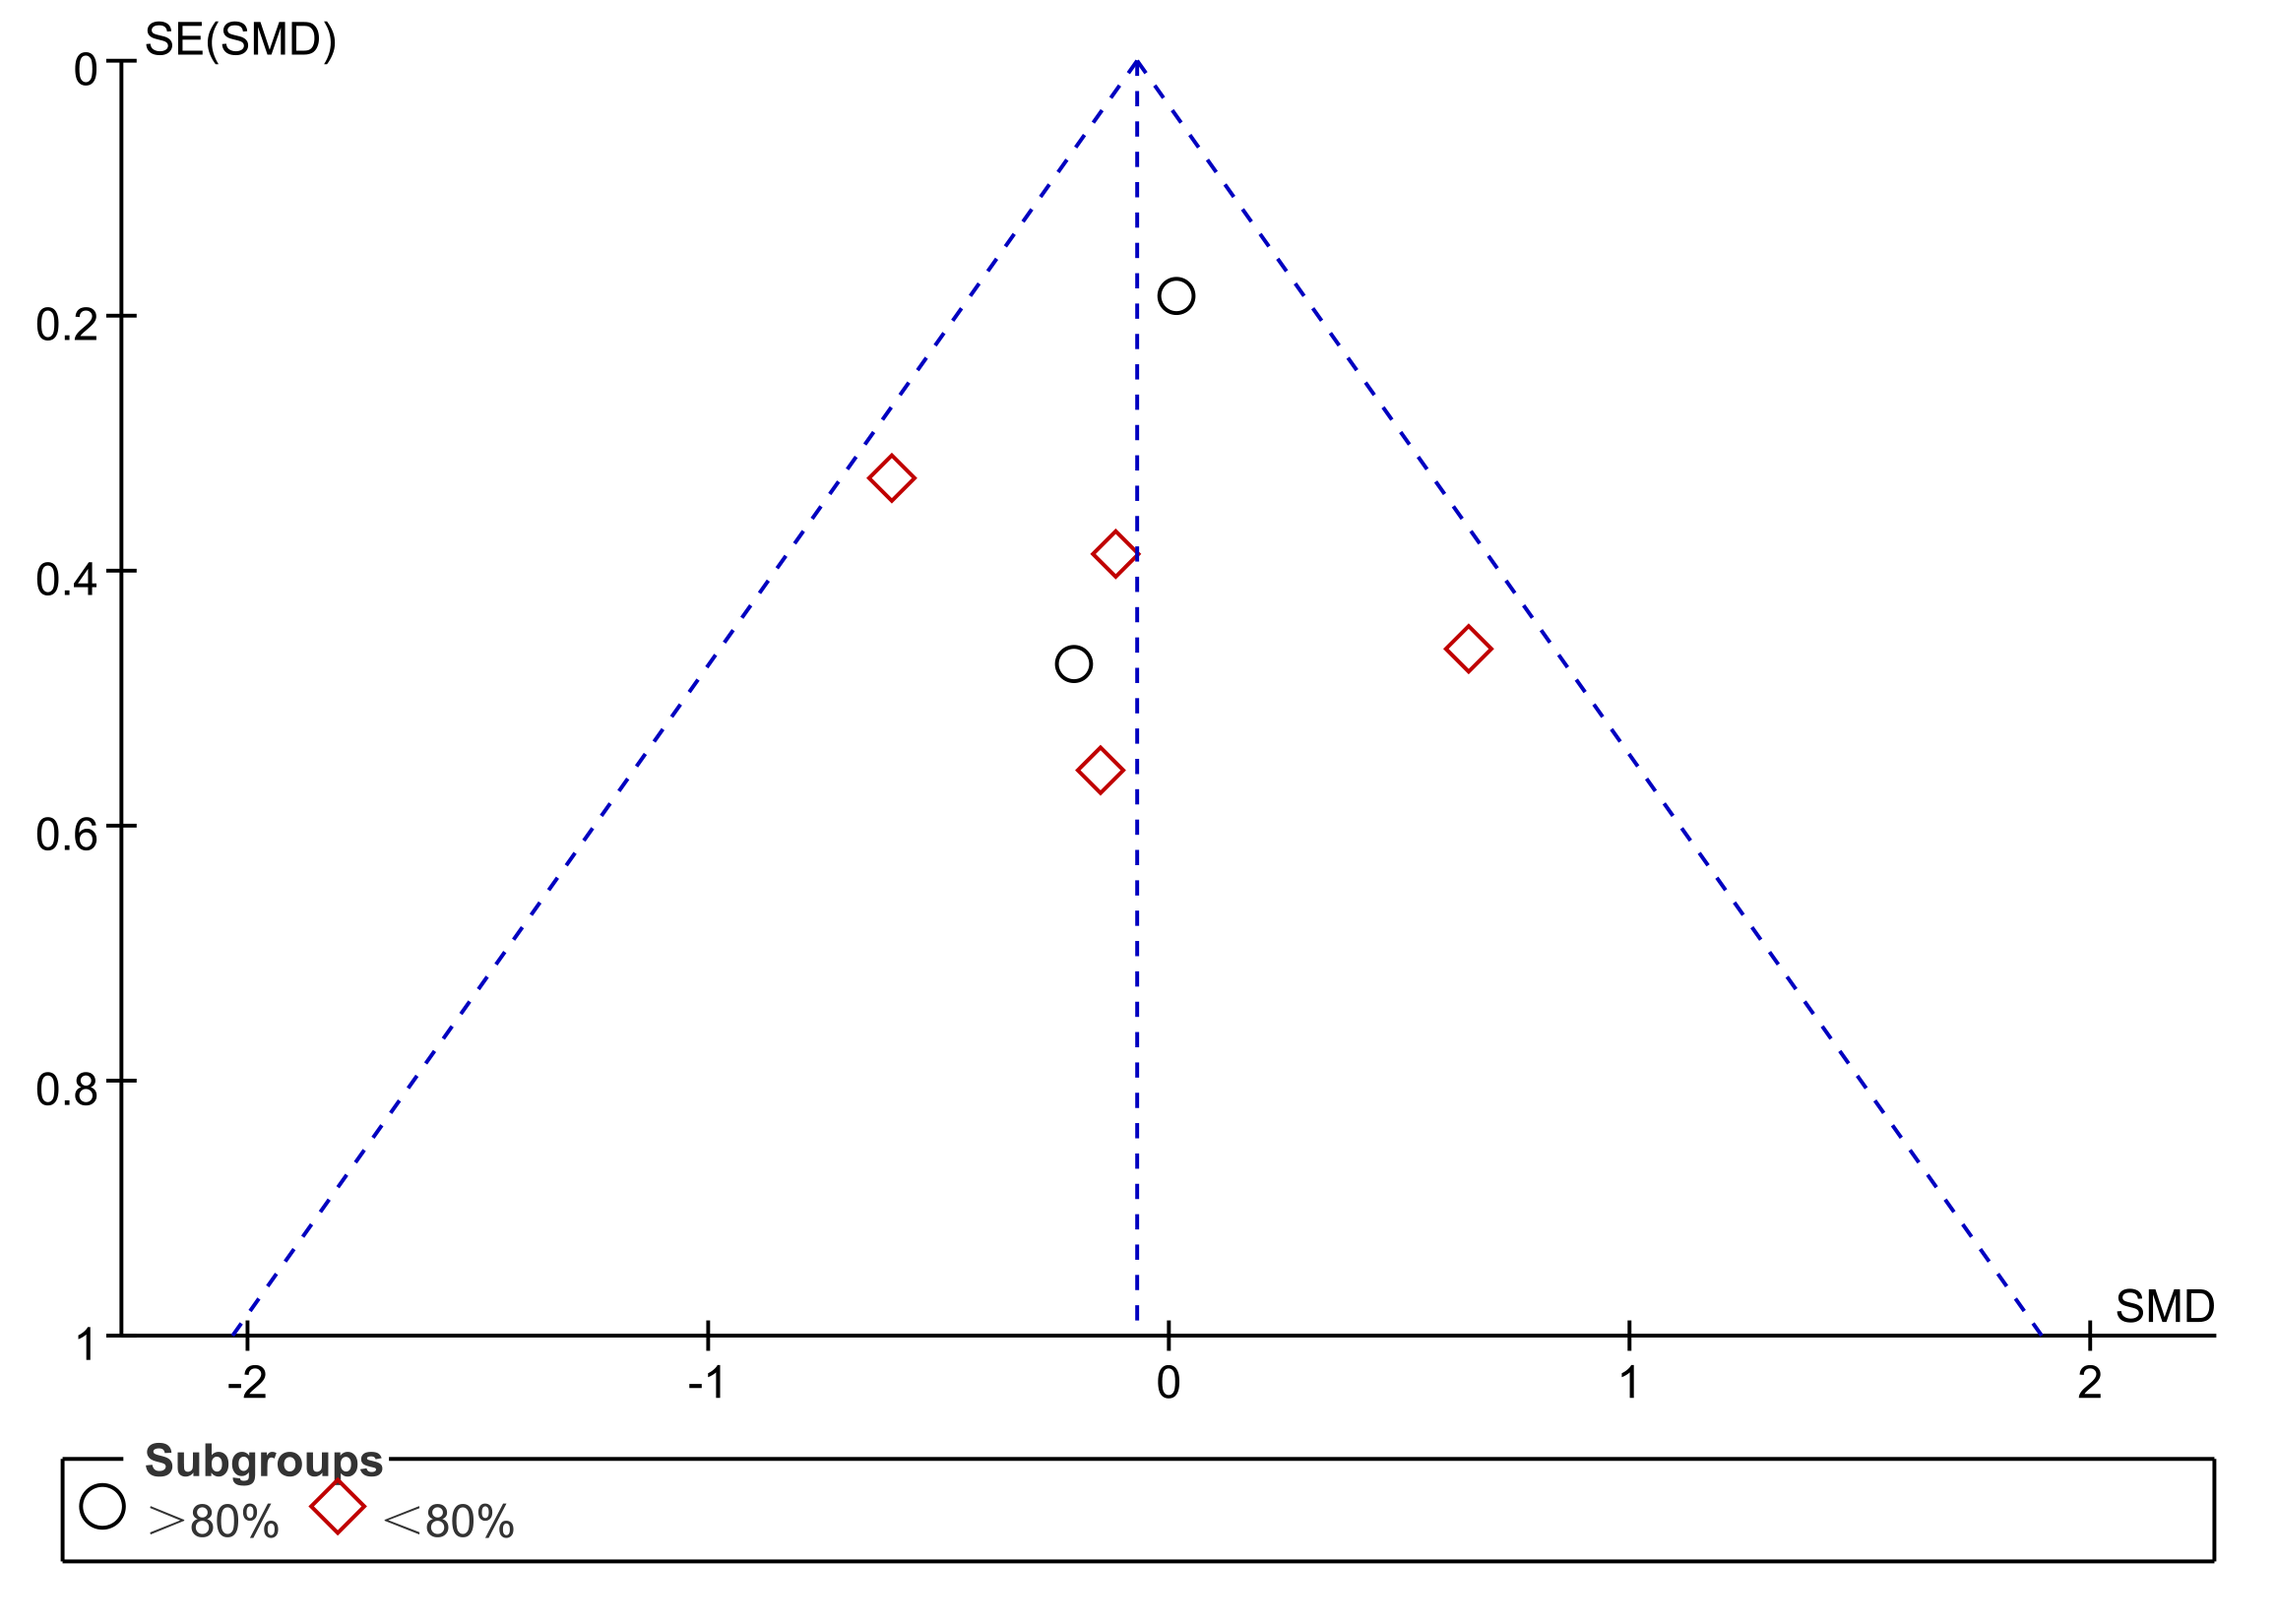


**Note:** Symmetric funnel plots showed no publication bias. >80% means studies with High adherence to ACSM recommendations . <80% means studies with low or uncertain adherence to ACSM recommendations. SE, standard error; SMD, standardized mean difference.

**Supplementary Figure S30** Sensitivity analyses of DBP


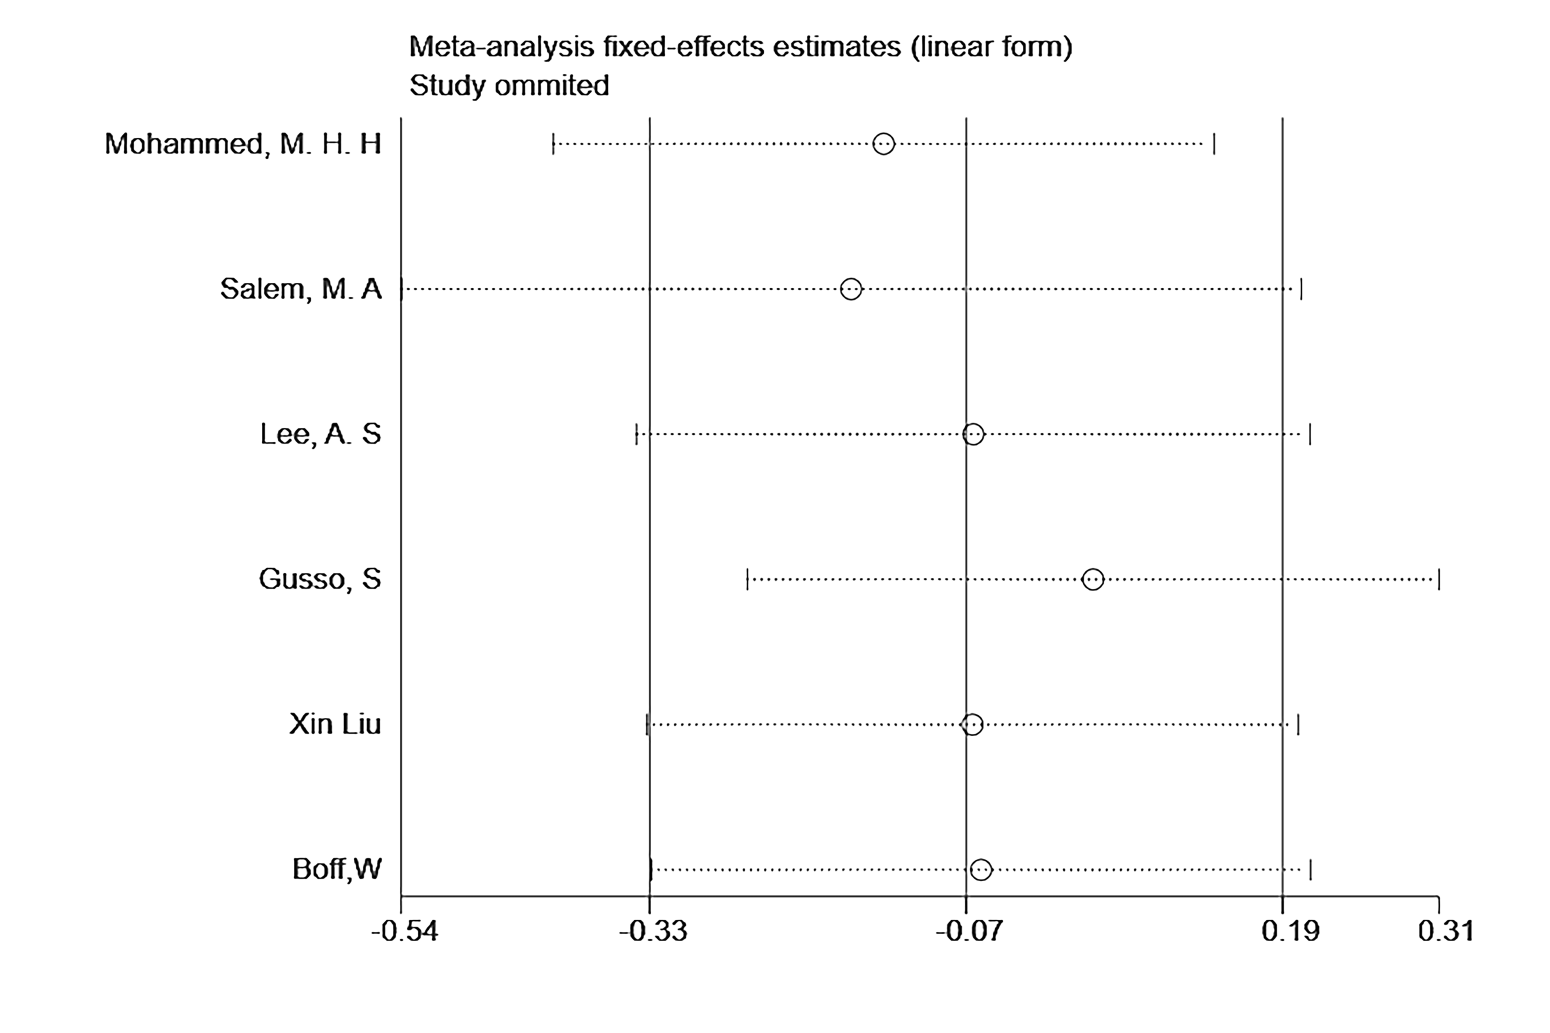


**Note:** The literature was eliminated one by one and the results showed that none of the studies had a greater impact on the overall.

**Supplementary Figure S31** Forest plot of Systolic blood pressure (SBP)


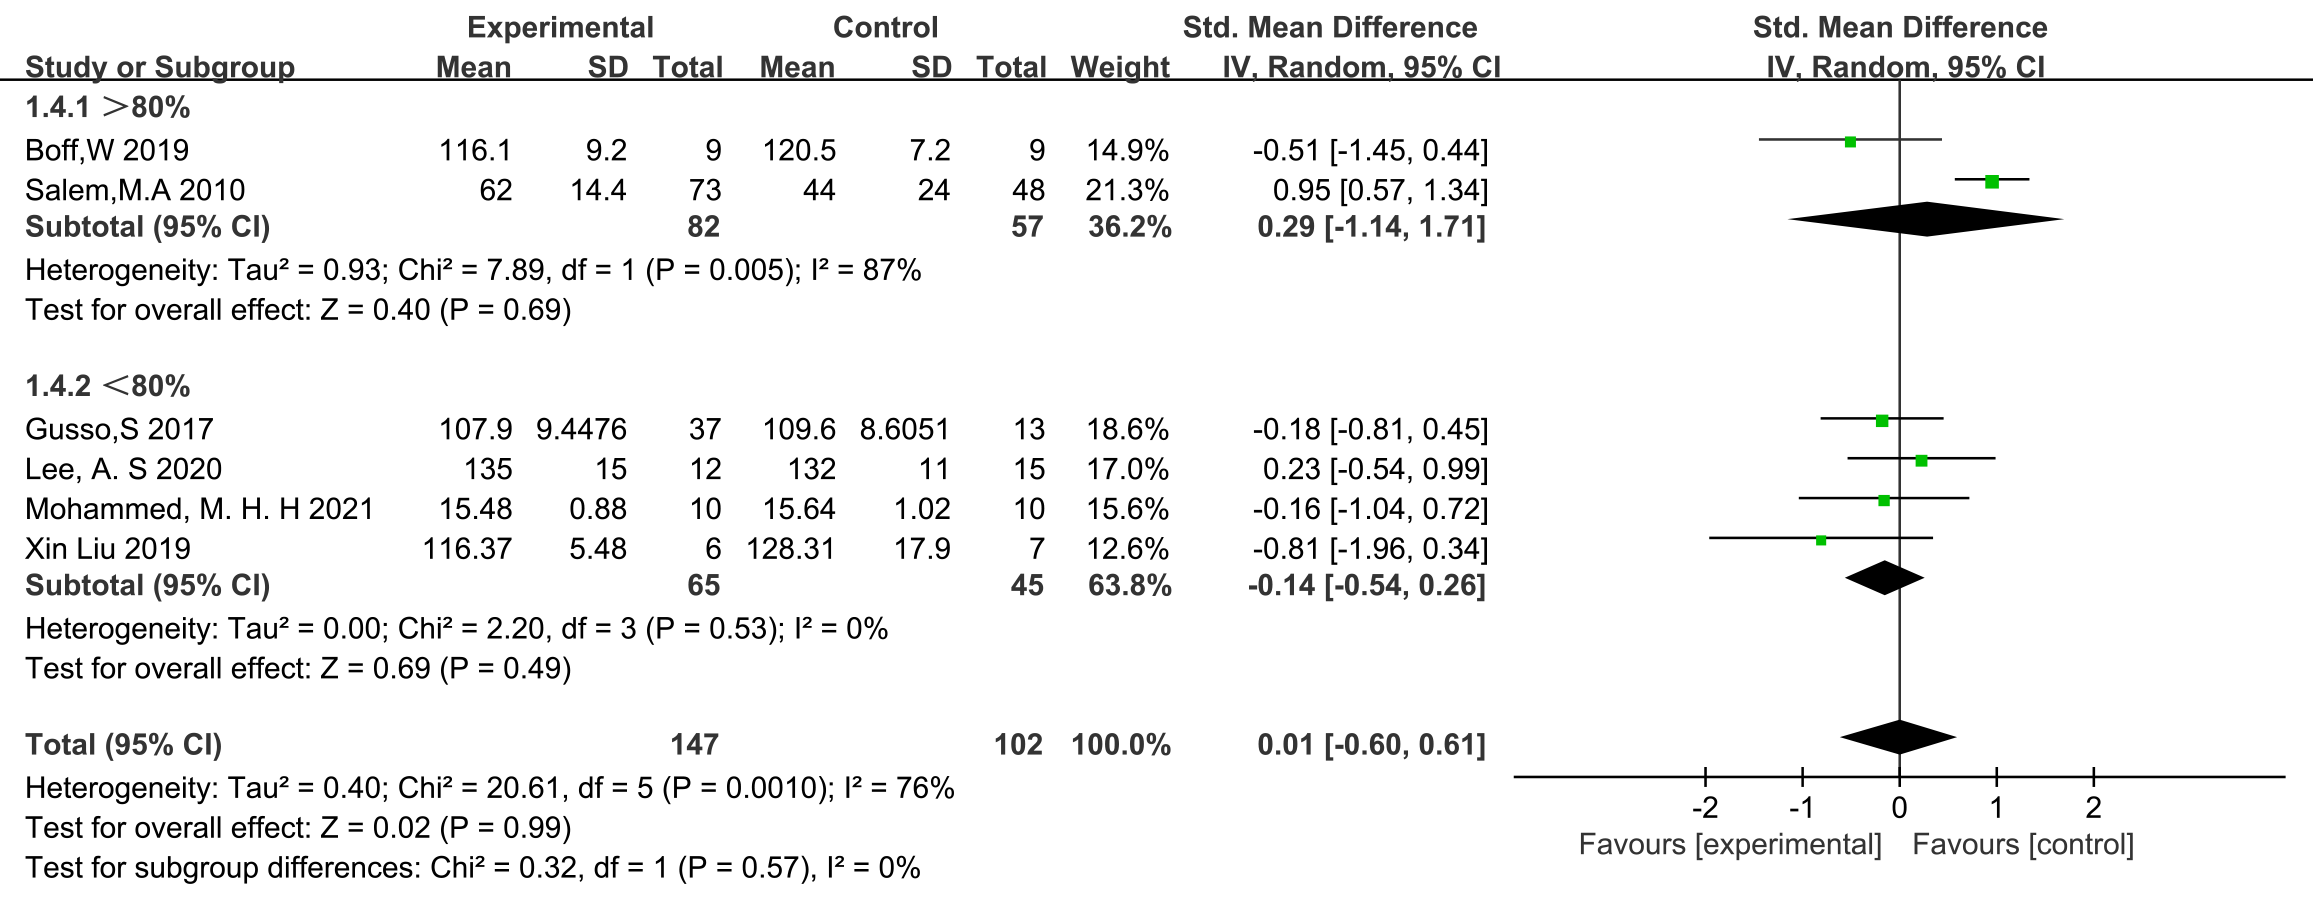


**Note:** Forest plot of Systolic blood pressure (SBP): High adherence to ACSM recommendations (>80%) vs. low or uncertain adherence to ACSM recommendations (<80%). Due to the high heterogeneity (I2 = 76%), a random effect model was used. Data are presented as standardized mean difference because the units are inconsistent between indicators.

Overal result: A total of 249 participants were included (102 in the control group and 147 in the experimental group). Exercise had no significant improvement on SBP in patients with T1DM (SMD: 0.01 [95%Cl: -0.60, 0.61, I2 = 76%, p = 0.99]).

SUBGROUP ANALYSIS: Neither the subgroup with high adherence to ACSM (SMD: 0.29 [95%Cl: -1.14, 1.71], I2 = 87%, p = 0.69) nor the subgroup with low adherence (SMD: -0.14 [95%Cl: -0.54, 0.26], I2 = 0%, p=0.49) had a significant effect on SBP.

**Supplementary Figure S32** Forest plot of SBP


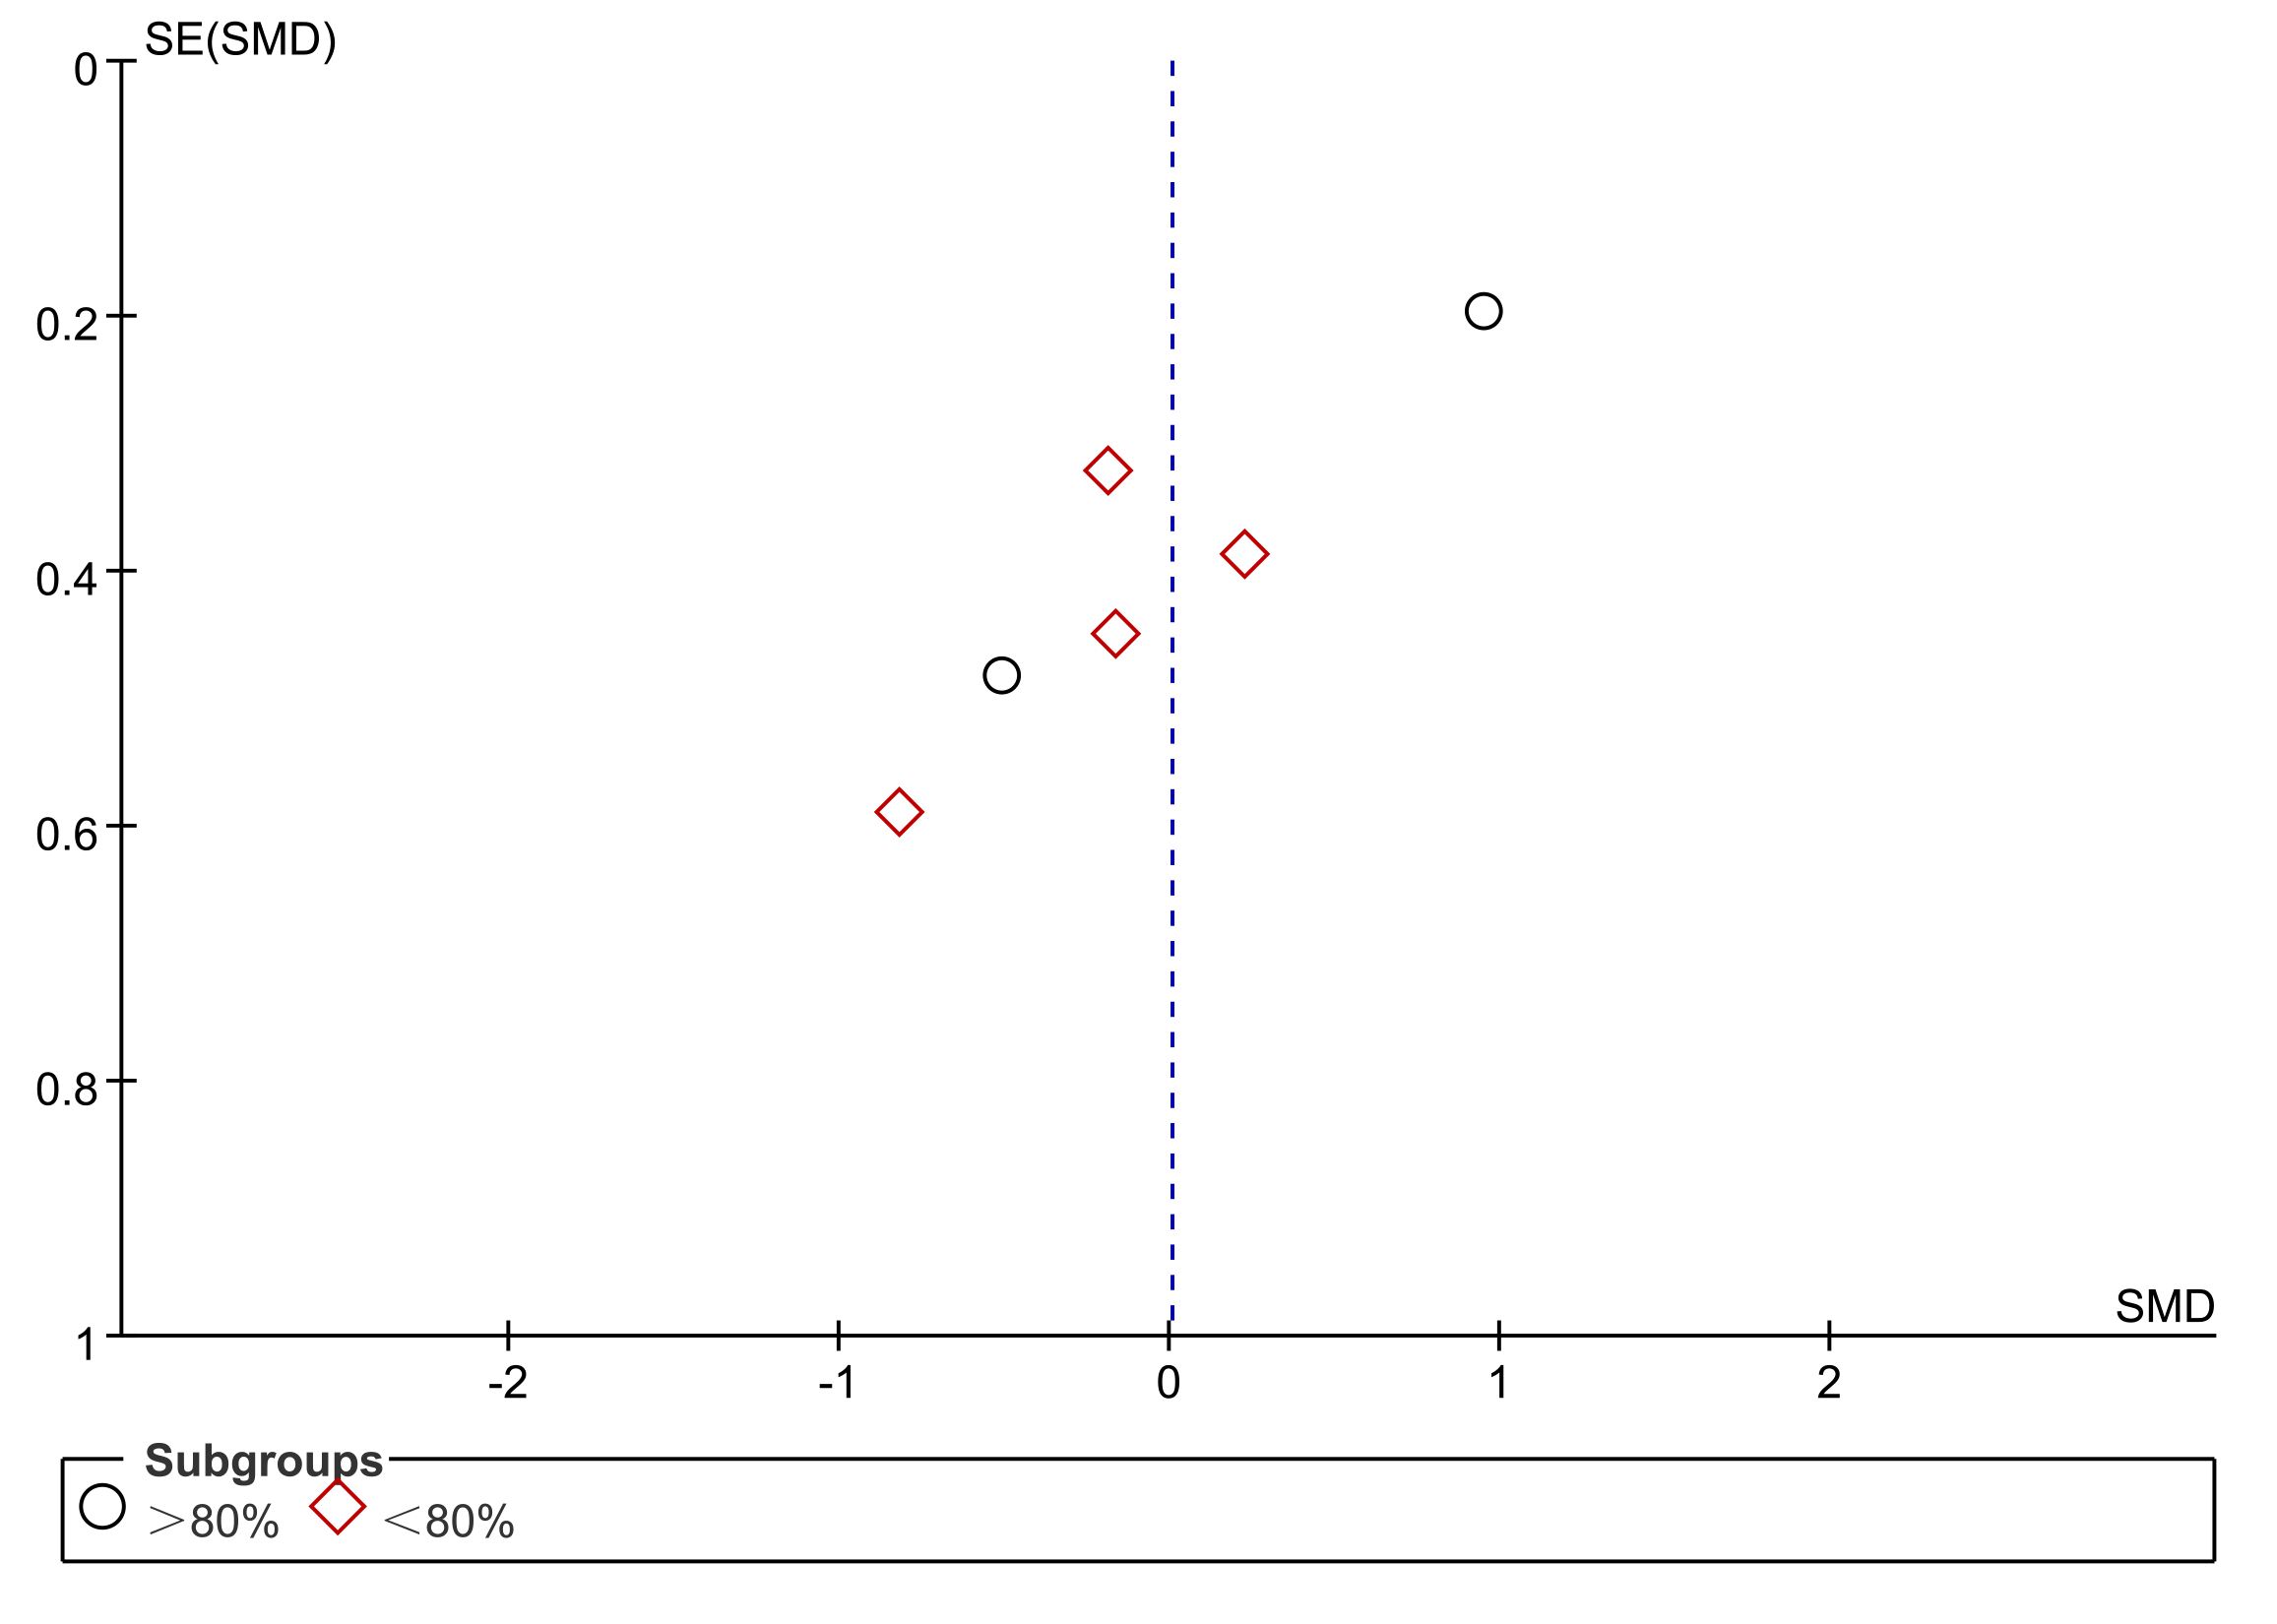


**Note:** Symmetric funnel plots showed no publication bias. >80% means studies with High adherence to ACSM recommendations . <80% means studies with low or uncertain adherence to ACSM recommendations. SE, standard error; SMD, standardized mean difference.

**Supplementary Figure S33** Sensitivity analyses of SBP


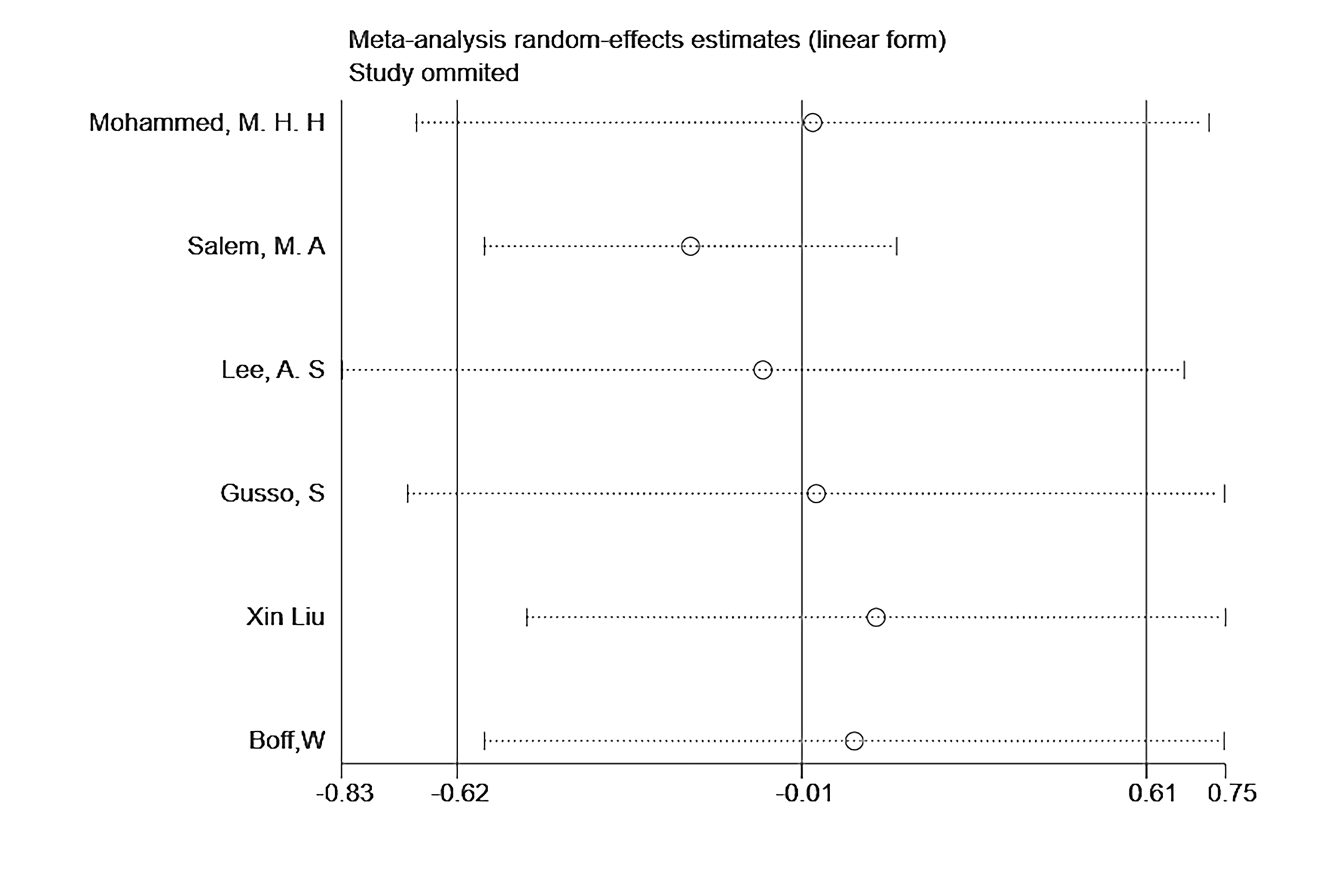


**Note:** The literature was eliminated one by one and the results showed that none of the studies had a greater impact on the overall.
